# Supplementary material for: New Benzofuranoids and Phenylpropanoids from the Mangrove Endophytic Fungus, Aspergillus sp. ZJ-68
Source: MDPI journal article supplement (doi:10.3390/md17080478), 2019-08-18
Supplement: s1 [file s1]

# Supporting Information

## New Benzofuranoids and Phenylpropanoids from the Mangrove

### Endophytic Fungus, *Aspergillus* sp. ZJ-68

Runlin Cai <sup>1</sup>, Hongming Jiang <sup>1</sup>, Zhenming Zang <sup>1</sup>, Chunyuan Li <sup>2, \*</sup> and Zhigang She <sup>1, 3, \*</sup>

<sup>1</sup> School of Chemistry, Sun Yat-sen University, Guangzhou 510275, People's Republic of China;  
cairlin@mail2.sysu.edu.cn (R.C.); jianghm7@mail2.sysu.edu.cn (H.J.);  
zangzhm@mail2.sysu.edu.cn (Z.Z.); cessshzhg@mail.sysu.edu.cn (Z. S.)

<sup>2</sup> College of Materials and Energy, South China Agricultural University, Guangzhou 510642, People's Republic of China; chunyuianli@scau.edu.cn (C.L.)

<sup>3</sup> South China Sea Bio-Resource Exploitation and Utilization Collaborative Innovation Center, Guangzhou 510006, People's Republic of China

\* Correspondence: chunyuianli@scau.edu.cn (C.L.); cessshzhg@mail.sysu.edu.cn (Z. S.);  
Tel./Fax: +86-020-84113356 (Z. S.)

### The List of Contents

| No.       | Content                                                                              | page |
|-----------|--------------------------------------------------------------------------------------|------|
| <b>1</b>  | Figure S1. HRESIMS spectrum of <b>1</b>                                              | 1    |
| <b>2</b>  | Figure S2. $^1\text{H}$ NMR spectrum of <b>1</b> in $\text{CDCl}_3$                  | 1    |
| <b>3</b>  | Figure S3. $^{13}\text{C}$ NMR spectrum of <b>1</b> in $\text{CDCl}_3$               | 2    |
| <b>4</b>  | Figure S4. DEPT spectrum of <b>1</b> in $\text{CDCl}_3$                              | 2    |
| <b>5</b>  | Figure S5. $^1\text{H}$ - $^1\text{H}$ COSY spectrum of <b>1</b> in $\text{CDCl}_3$  | 3    |
| <b>6</b>  | Figure S6. HSQC spectrum of <b>1</b> in $\text{CDCl}_3$                              | 3    |
| <b>7</b>  | Figure S7. HMBC spectrum of <b>1</b> in $\text{CDCl}_3$                              | 4    |
| <b>8</b>  | Figure S8. IR spectrum of <b>1</b>                                                   | 4    |
| <b>9</b>  | Figure S9. UV data of <b>1</b> in MeOH                                               | 5    |
| <b>10</b> | Figure S10. HRESIMS spectrum of <b>2</b>                                             | 5    |
| <b>11</b> | Figure S11. $^1\text{H}$ NMR spectrum of <b>2</b> in $\text{CDCl}_3$                 | 6    |
| <b>12</b> | Figure S12. $^{13}\text{C}$ NMR spectrum of <b>2</b> in $\text{CDCl}_3$              | 6    |
| <b>13</b> | Figure S13. DEPT spectrum of <b>2</b> in $\text{CDCl}_3$                             | 7    |
| <b>14</b> | Figure S14. $^1\text{H}$ - $^1\text{H}$ COSY spectrum of <b>2</b> in $\text{CDCl}_3$ | 7    |
| <b>15</b> | Figure S15. HSQC spectrum of <b>2</b> in $\text{CDCl}_3$                             | 8    |
| <b>16</b> | Figure S16. HMBC spectrum of <b>2</b> in $\text{CDCl}_3$                             | 8    |
| <b>17</b> | Figure S17. IR spectrum of <b>2</b>                                                  | 9    |
| <b>18</b> | Figure S18. UV data of <b>2</b> in MeOH                                              | 9    |
| <b>19</b> | Figure S19. HRESIMS spectrum of <b>3</b>                                             | 10   |
| <b>20</b> | Figure S20. $^1\text{H}$ NMR spectrum of <b>3</b> in $\text{CDCl}_3$                 | 10   |
| <b>21</b> | Figure S21. $^{13}\text{C}$ NMR spectrum of <b>3</b> in $\text{CDCl}_3$              | 11   |
| <b>22</b> | Figure S22. DEPT spectrum of <b>3</b> in $\text{CDCl}_3$                             | 11   |
| <b>23</b> | Figure S23. $^1\text{H}$ - $^1\text{H}$ COSY spectrum of <b>3</b> in $\text{CDCl}_3$ | 12   |
| <b>24</b> | Figure S24. HSQC spectrum of <b>3</b> in $\text{CDCl}_3$                             | 12   |
| <b>25</b> | Figure S25. HMBC spectrum of <b>3</b> in $\text{CDCl}_3$                             | 13   |
| <b>26</b> | Figure S26. IR spectrum of <b>3</b>                                                  | 13   |
| <b>27</b> | Figure S27. UV data of <b>3</b> in MeOH                                              | 14   |

|           |                                                                                      |    |
|-----------|--------------------------------------------------------------------------------------|----|
| <b>28</b> | Figure S28. HRESIMS spectrum of <b>4</b>                                             | 14 |
| <b>29</b> | Figure S29. $^1\text{H}$ NMR spectrum of <b>4</b> in $\text{CDCl}_3$                 | 15 |
| <b>30</b> | Figure S30. $^{13}\text{C}$ NMR spectrum of <b>4</b> in $\text{CDCl}_3$              | 15 |
| <b>31</b> | Figure S31. $^1\text{H}$ - $^1\text{H}$ COSY spectrum of <b>4</b> in $\text{CDCl}_3$ | 16 |
| <b>32</b> | Figure S32. HSQC spectrum of <b>4</b> in $\text{CDCl}_3$                             | 16 |
| <b>33</b> | Figure S33. HMBC spectrum of <b>4</b> in $\text{CDCl}_3$                             | 17 |
| <b>34</b> | Figure S34. IR spectrum of <b>4</b>                                                  | 17 |
| <b>35</b> | Figure S35. UV data of <b>4</b> in MeOH                                              | 18 |
| <b>36</b> | Figure S36. HRESIMS spectrum of <b>5</b>                                             | 18 |
| <b>37</b> | Figure S37. $^1\text{H}$ NMR spectrum of <b>5</b> in $\text{CDCl}_3$                 | 19 |
| <b>38</b> | Figure S38. $^{13}\text{C}$ NMR spectrum of <b>5</b> in $\text{CDCl}_3$              | 19 |
| <b>39</b> | Figure S39. $^1\text{H}$ - $^1\text{H}$ COSY spectrum of <b>5</b> in $\text{CDCl}_3$ | 20 |
| <b>40</b> | Figure S40. HSQC spectrum of <b>5</b> in $\text{CDCl}_3$                             | 20 |
| <b>41</b> | Figure S41. HMBC spectrum of <b>5</b> in $\text{CDCl}_3$                             | 21 |
| <b>42</b> | Figure S42. IR spectrum of <b>5</b>                                                  | 21 |
| <b>43</b> | Figure S43. UV data of <b>5</b> in MeOH                                              | 22 |
| <b>44</b> | Figure S44. HRESIMS spectrum of <b>6</b>                                             | 22 |
| <b>45</b> | Figure S45. $^1\text{H}$ NMR spectrum of <b>6</b> in acetone- $d_6$                  | 23 |
| <b>46</b> | Figure S46. $^{13}\text{C}$ NMR spectrum of <b>6</b> in acetone- $d_6$               | 23 |
| <b>47</b> | Figure S47. DEPT spectrum of <b>6</b> in acetone- $d_6$                              | 24 |
| <b>48</b> | Figure S48. $^1\text{H}$ - $^1\text{H}$ COSY spectrum of <b>6</b> in acetone- $d_6$  | 24 |
| <b>49</b> | Figure S49. HSQC spectrum of <b>6</b> in acetone- $d_6$                              | 25 |
| <b>50</b> | Figure S50. HMBC spectrum of <b>6</b> in acetone- $d_6$                              | 25 |
| <b>51</b> | Figure S51. IR spectrum of <b>6</b>                                                  | 26 |
| <b>52</b> | Figure S52. UV data of <b>6</b> in MeOH                                              | 26 |
| <b>53</b> | Figure S53. HRESIMS spectrum of <b>7</b>                                             | 27 |
| <b>54</b> | Figure S54. $^1\text{H}$ NMR spectrum of <b>7</b> in methanol- $d_4$                 | 27 |
| <b>55</b> | Figure S55. $^{13}\text{C}$ NMR spectrum of <b>7</b> in methanol- $d_4$              | 28 |
| <b>56</b> | Figure S56. DEPT spectrum of <b>7</b> in methanol- $d_4$                             | 28 |

|           |                                                                                                   |    |
|-----------|---------------------------------------------------------------------------------------------------|----|
| <b>57</b> | Figure S57. $^1\text{H}$ - $^1\text{H}$ COSY spectrum of <b>7</b> in methanol- $d_4$              | 29 |
| <b>58</b> | Figure S58. HSQC spectrum of <b>7</b> in methanol- $d_4$                                          | 29 |
| <b>59</b> | Figure S59. HMBC spectrum of <b>7</b> in methanol- $d_4$                                          | 30 |
| <b>60</b> | Figure S60. NOESY spectrum of <b>7</b> in methanol- $d_4$                                         | 30 |
| <b>61</b> | Figure S61. IR spectrum of <b>7</b>                                                               | 31 |
| <b>62</b> | Figure S62. UV data of <b>7</b> in MeOH                                                           | 31 |
| <b>63</b> | Preparation of MTPA esters of <b>1</b> by the modified Mosher's method                            | 32 |
| <b>64</b> | Figure S63. ESIMS spectrum of ( <i>S</i> )-MTPA ester ( <b>1a</b> )                               | 32 |
| <b>65</b> | Figure S64. ESIMS spectrum of ( <i>R</i> )-MTPA ester ( <b>1b</b> )                               | 33 |
| <b>66</b> | Figure S65. $^1\text{H}$ NMR spectrum of ( <i>S</i> )-MTPA ester ( <b>1a</b> ) in $\text{CDCl}_3$ | 33 |
| <b>68</b> | Figure S66. $^1\text{H}$ NMR spectrum of ( <i>R</i> )-MTPA ester ( <b>1b</b> ) in $\text{CDCl}_3$ | 34 |
| <b>69</b> | The $^1\text{H}$ and $^{13}\text{C}$ NMR data and HRMS data of compounds <b>8–14</b>              | 35 |
| <b>70</b> | The rDNA sequencing data of <i>Aspergillus</i> sp. ZJ-68                                          | 37 |
| <b>71</b> | Figure S67. Simple picture and microscopic picture of <i>Aspergillus</i> sp. ZJ-68                | 37 |
| <b>72</b> | Figure S68. The chiral HPLC separation of ( $\pm$ )-penicisochroman A                             | 38 |
| <b>73</b> | ECD calculation details (Methods and Results)                                                     | 39 |

**Figure S1.** HRESIMS spectrum of **1**

1903A1188-1 #4-10 RT: 0.04-0.09 AV: 7 NL: 1.10E8  
T: FTMS + c ESI Full ms [150.0000-1500.0000]

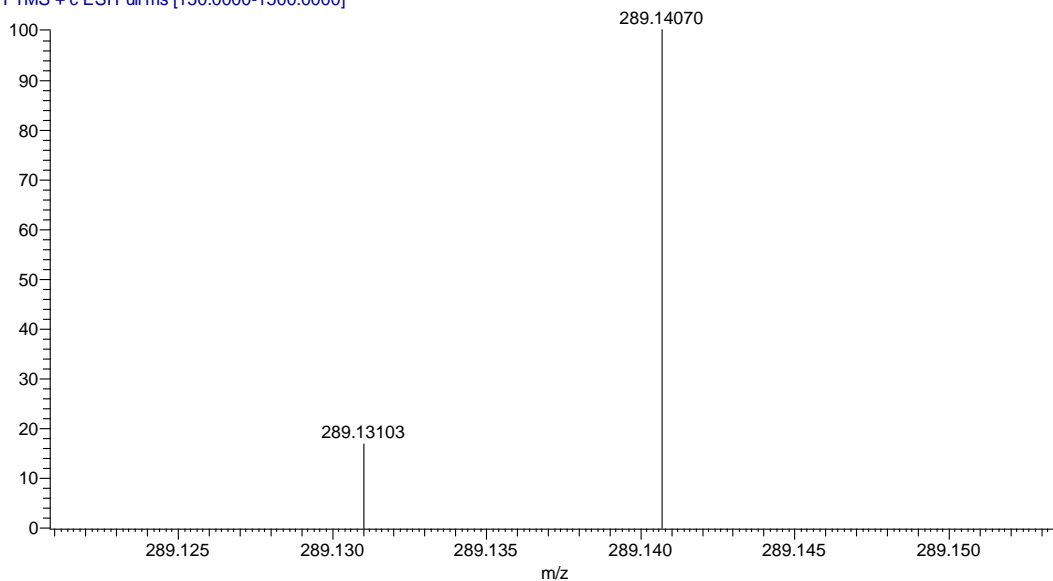

| m/z       | Theo. Mass | Delta (mmu) | RDB equiv. | Composition                                       |
|-----------|------------|-------------|------------|---------------------------------------------------|
| 289.14070 | 289.14103  | -0.33       | 4.5        | C <sub>15</sub> H <sub>22</sub> O <sub>4</sub> Na |

**Figure S2.** <sup>1</sup>H NMR spectrum of **1** in CDCl<sub>3</sub>

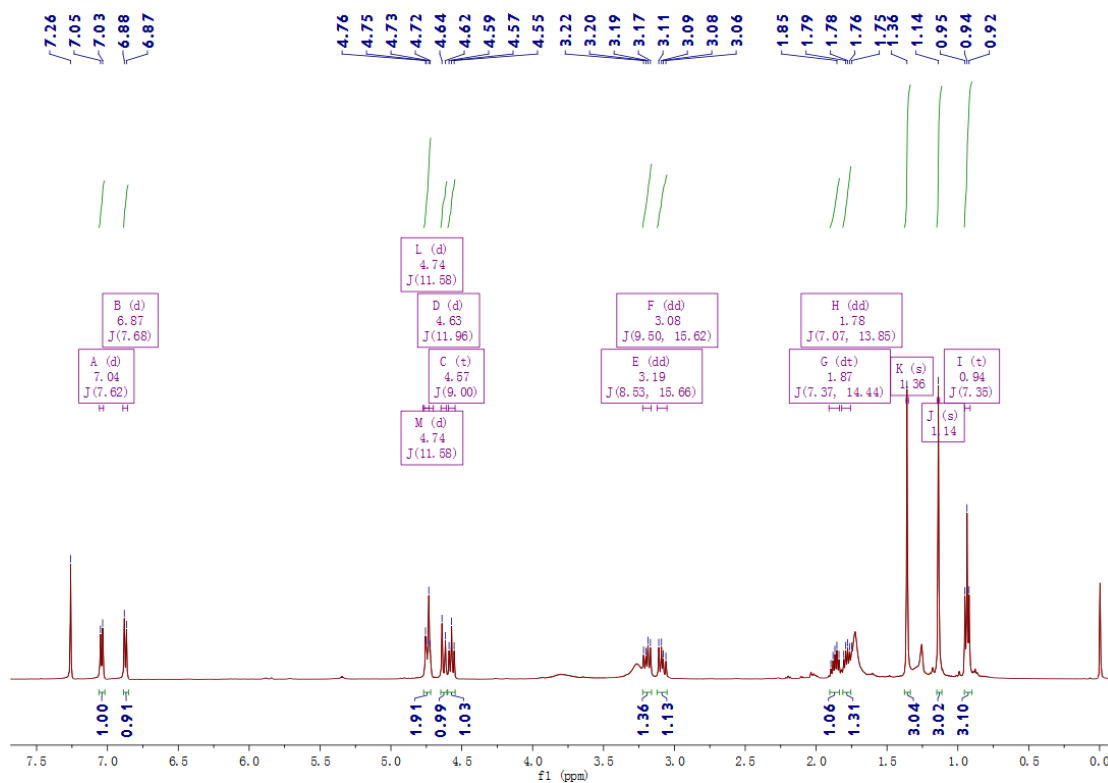

**Figure S3.**  $^{13}\text{C}$  NMR spectrum of **1** in  $\text{CDCl}_3$

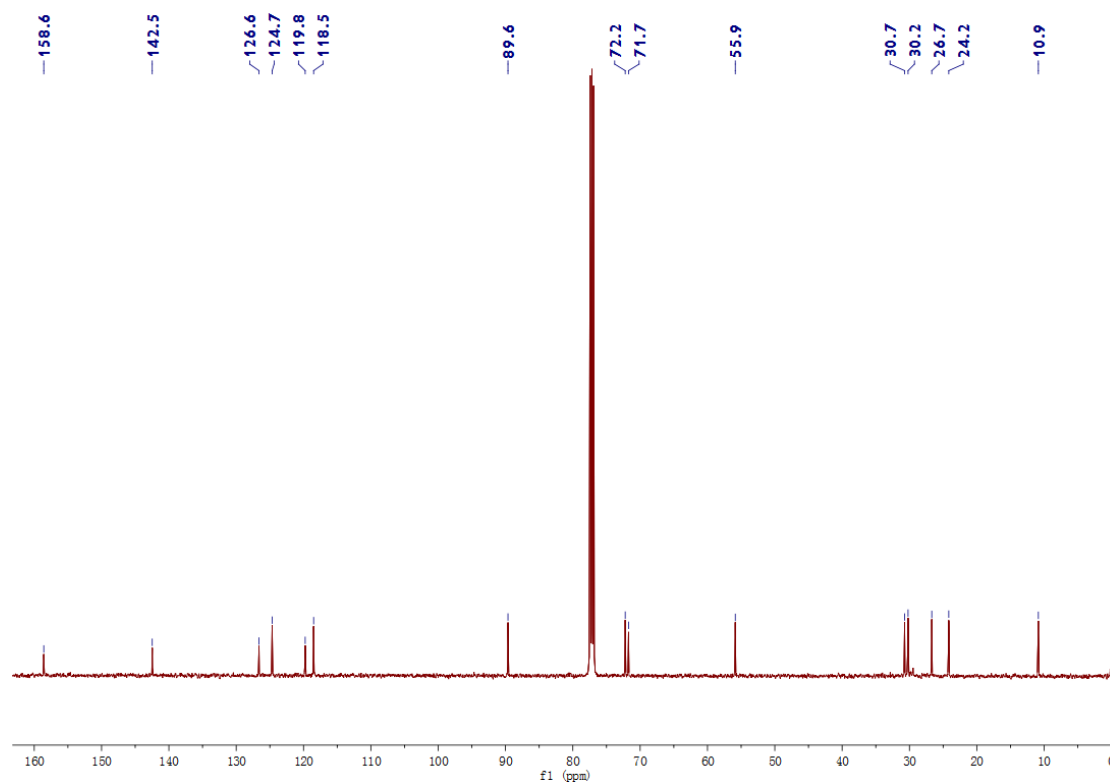

**Figure S4.** DEPT spectrum of **1** in  $\text{CDCl}_3$

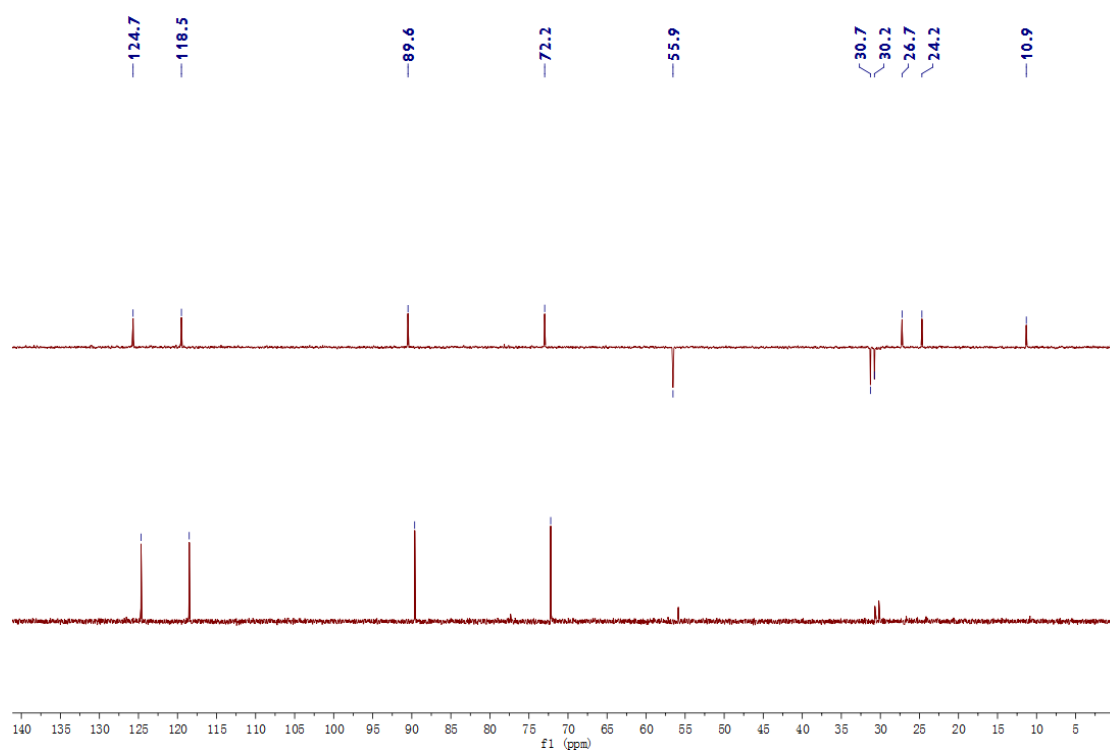

**Figure S5.**  $^1\text{H}$ - $^1\text{H}$  COSY spectrum of **1** in  $\text{CDCl}_3$

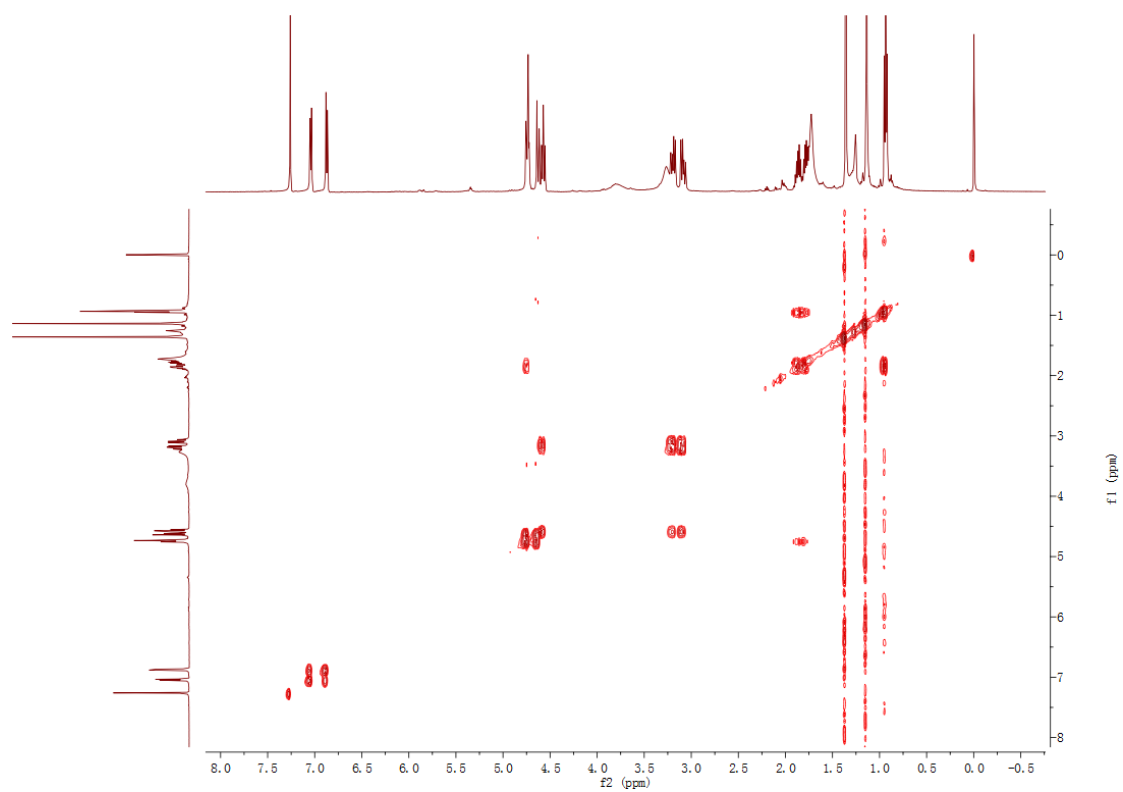

**Figure S6.** HSQC spectrum of **1** in  $\text{CDCl}_3$

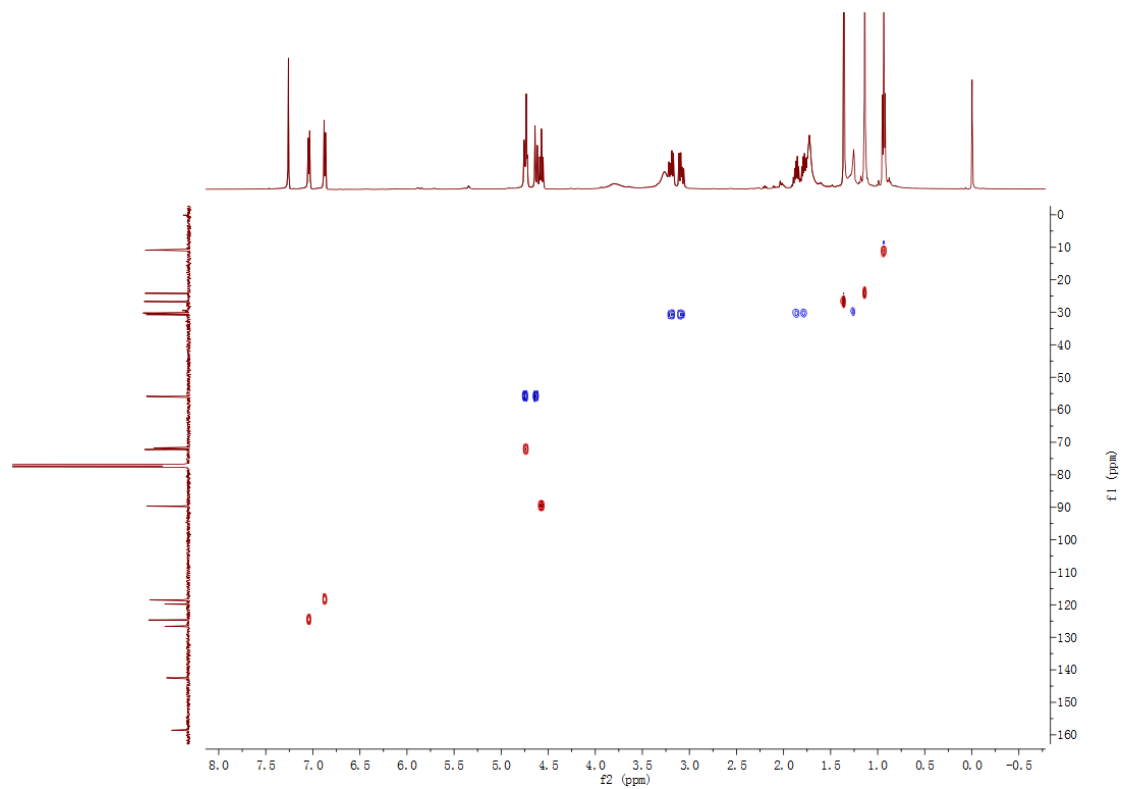

**Figure S7.** HMBC spectrum of **1** in CDCl<sub>3</sub>

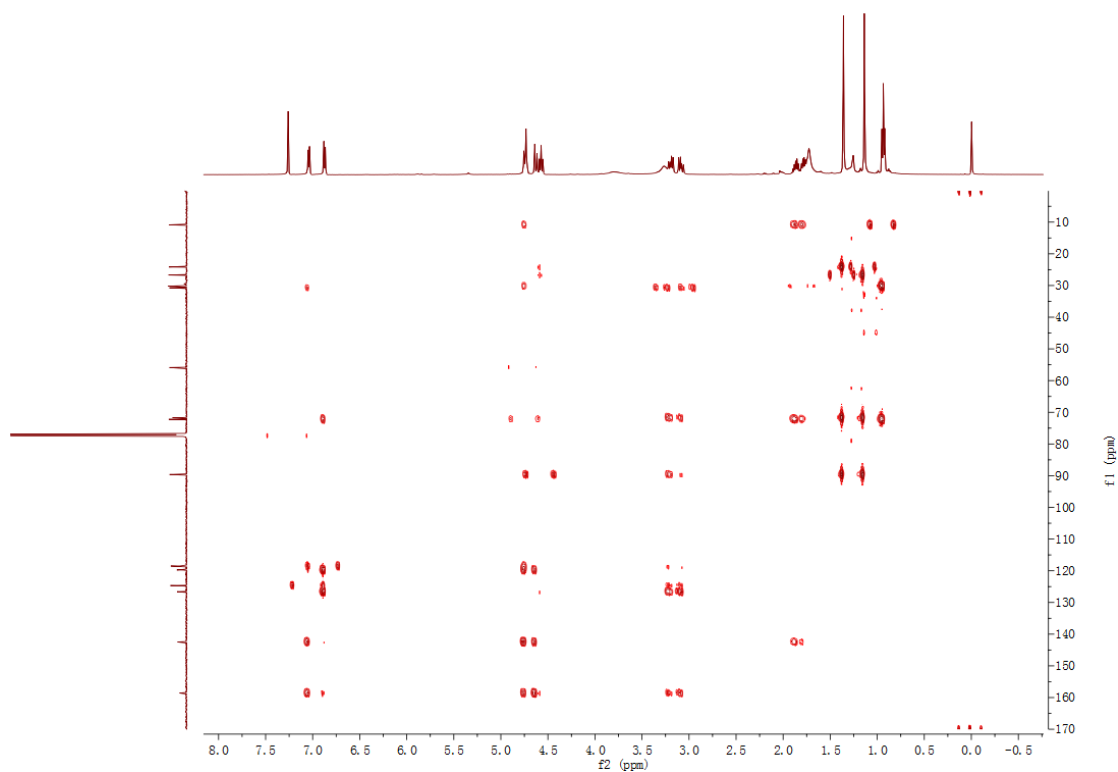

**Figure S8.** IR spectrum of **1**

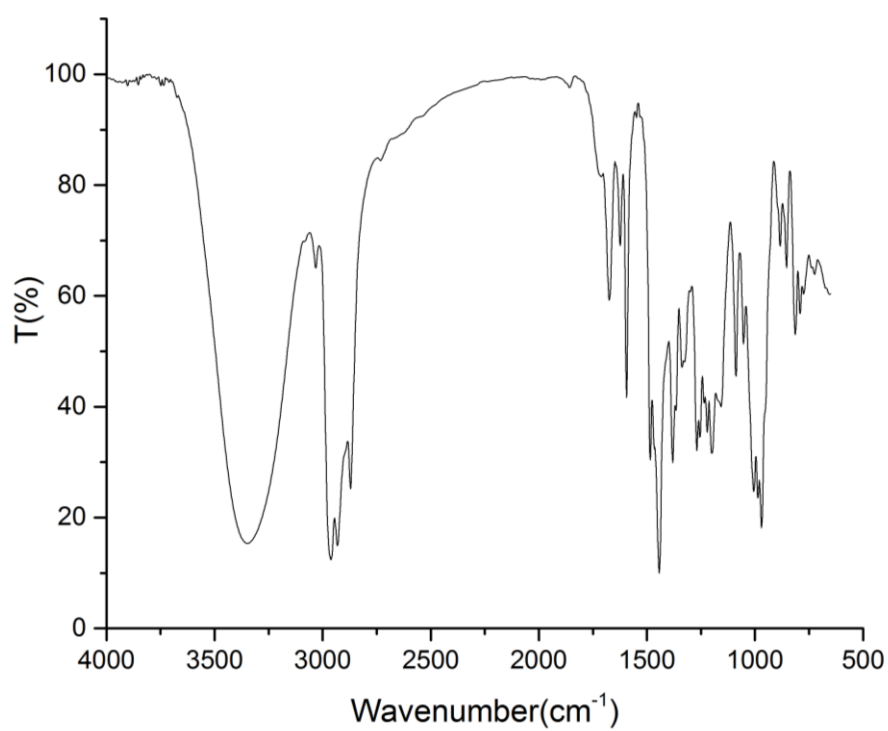

**Figure S9.** UV data of **1** in MeOH

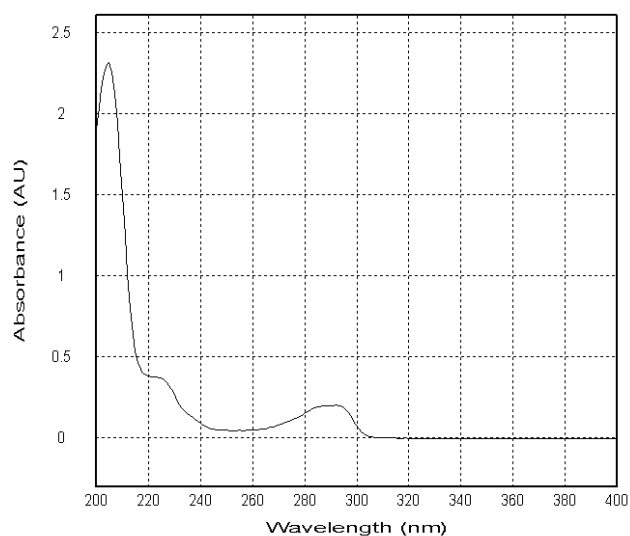

**Figure S10.** HRESIMS spectrum of **2**

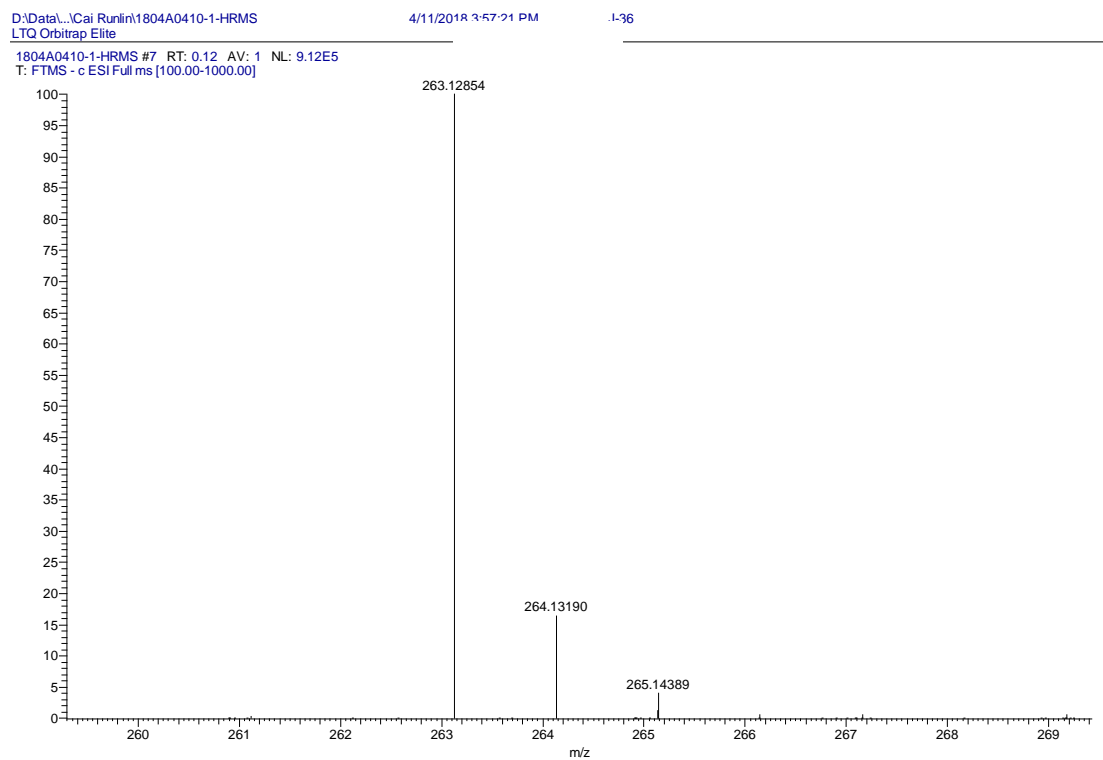

SPECTRUM -  
simulation :

| m/z       | Theo. Mass | Delta (ppm) | RDB equiv. | Composition                                    |
|-----------|------------|-------------|------------|------------------------------------------------|
| 263.12854 | 263.12888  | -1.3        | 6.5        | C <sub>15</sub> H <sub>19</sub> O <sub>4</sub> |

**Figure S11.**  $^1\text{H}$  NMR spectrum of **2** in  $\text{CDCl}_3$

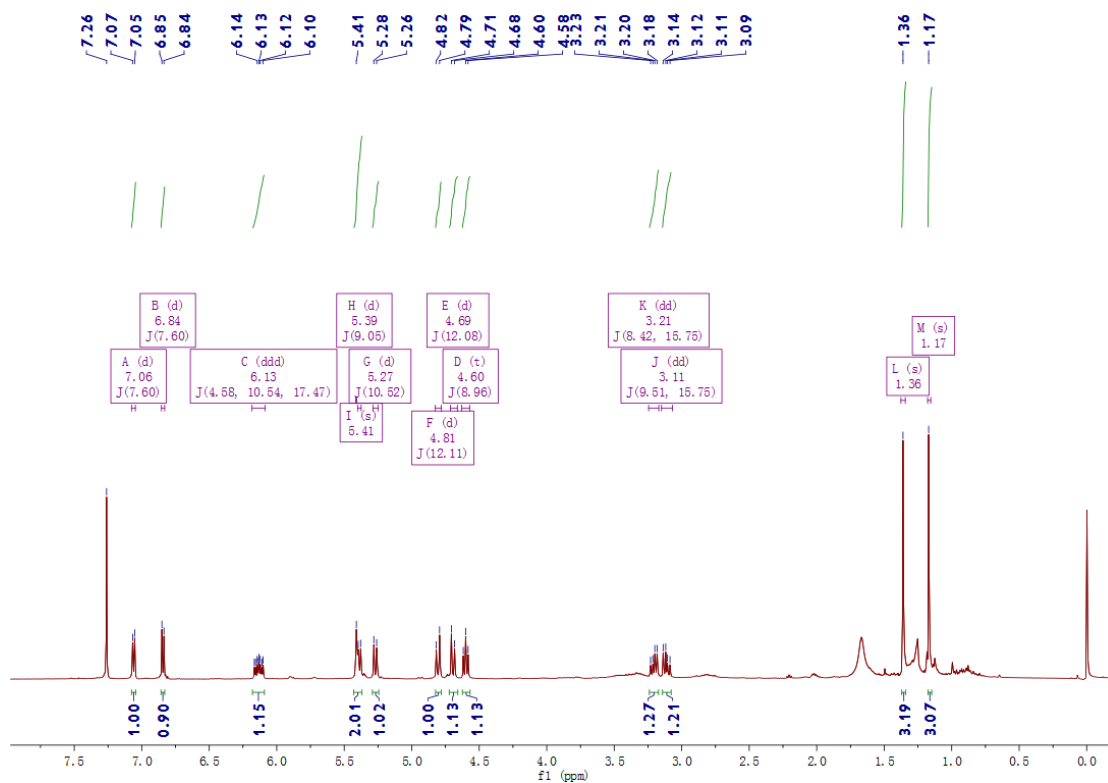

**Figure S12.**  $^{13}\text{C}$  NMR spectrum of **2** in  $\text{CDCl}_3$

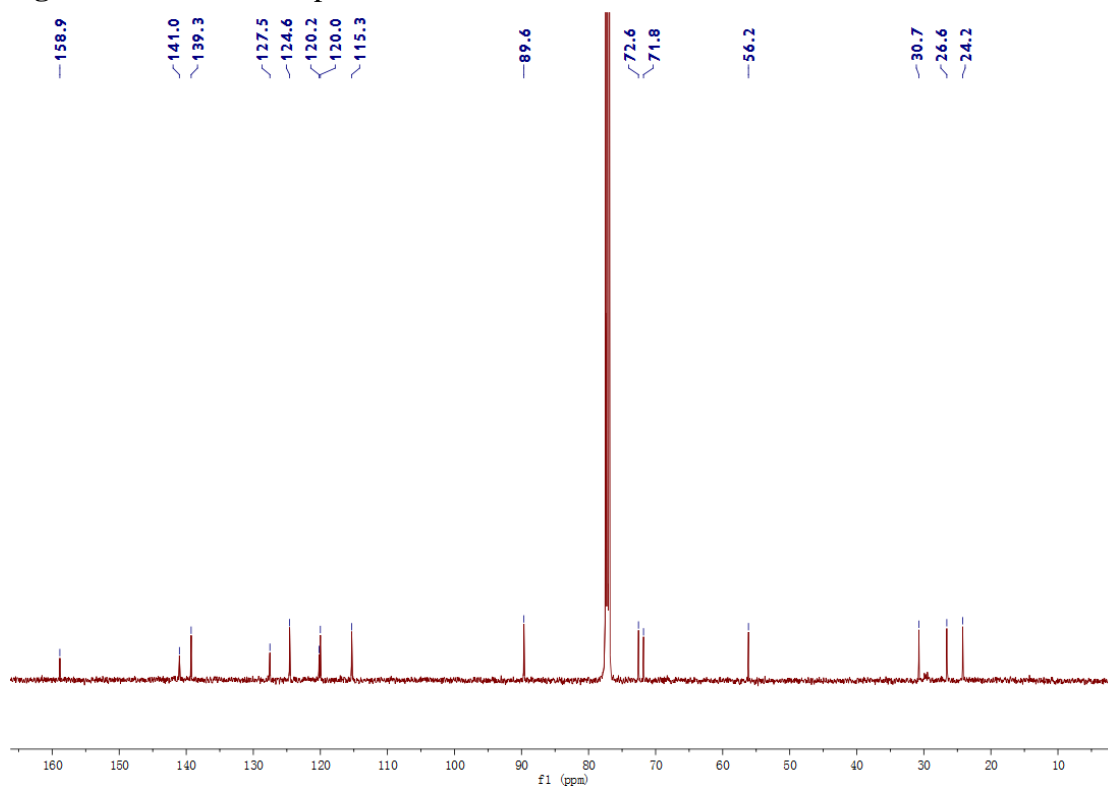

**Figure S13.** DEPT spectrum of **2** in  $\text{CDCl}_3$

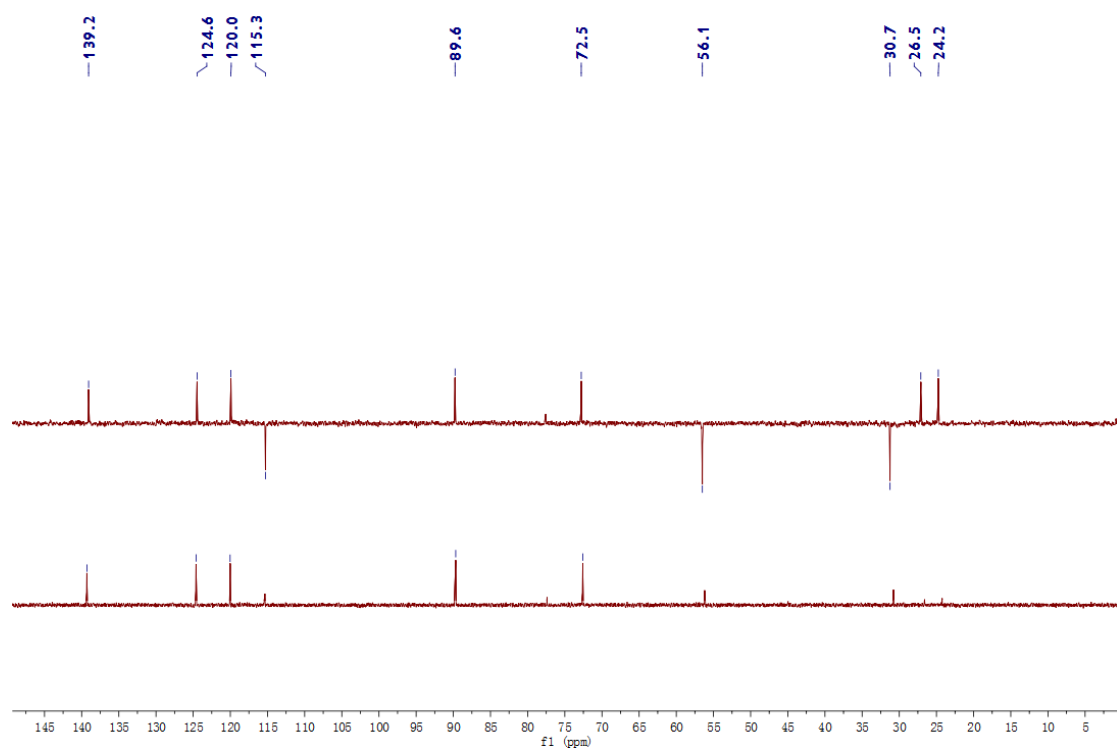

**Figure S14.**  $^1\text{H}$ - $^1\text{H}$  COSY spectrum of **2** in  $\text{CDCl}_3$

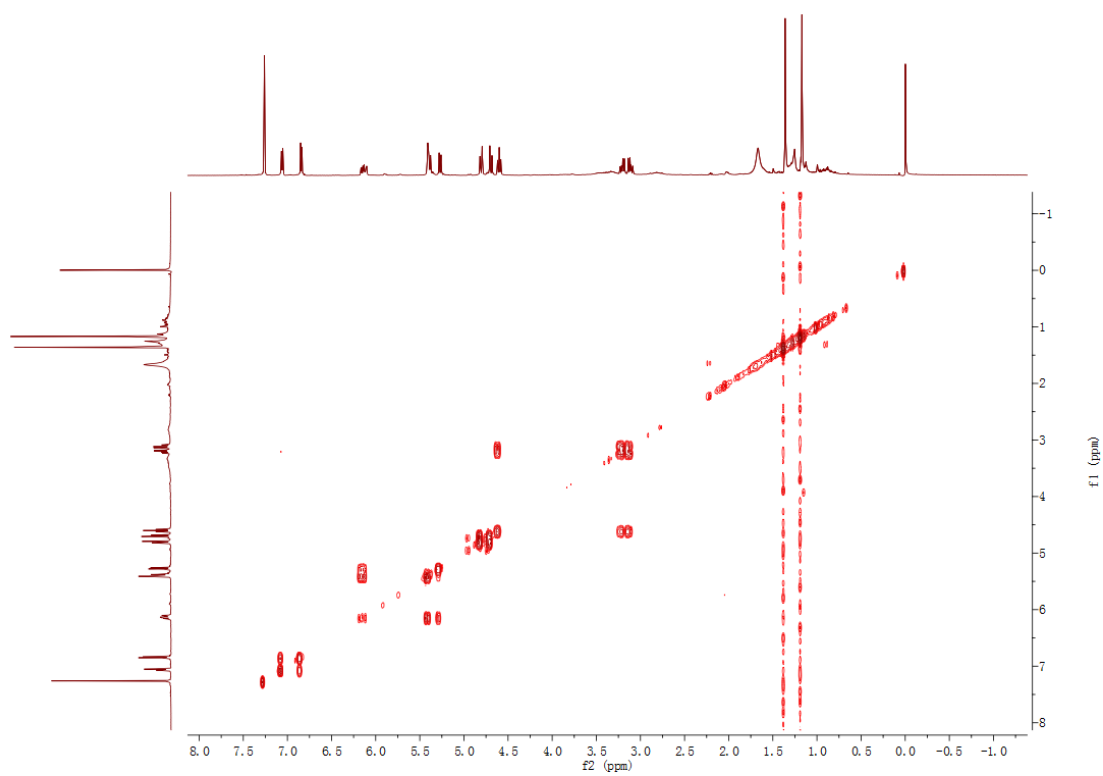

**Figure S15.** HSQC spectrum of **2** in CDCl<sub>3</sub>

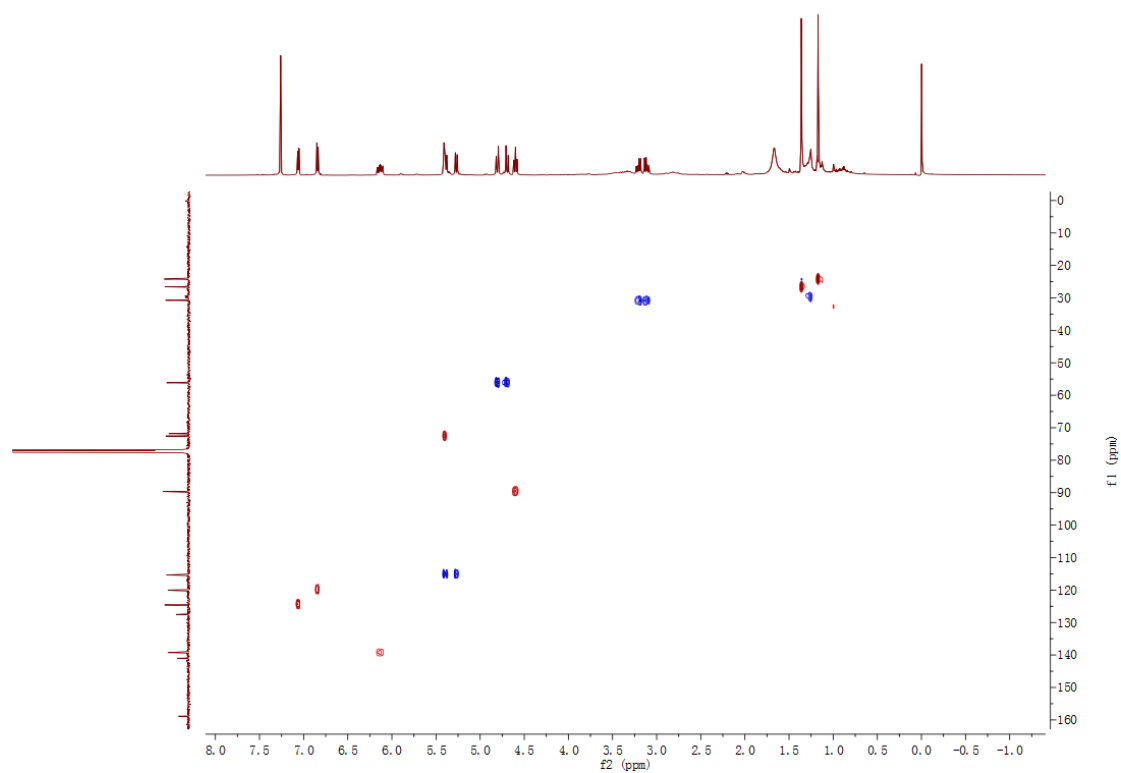

**Figure S16.** HMBC spectrum of **2** in CDCl<sub>3</sub>

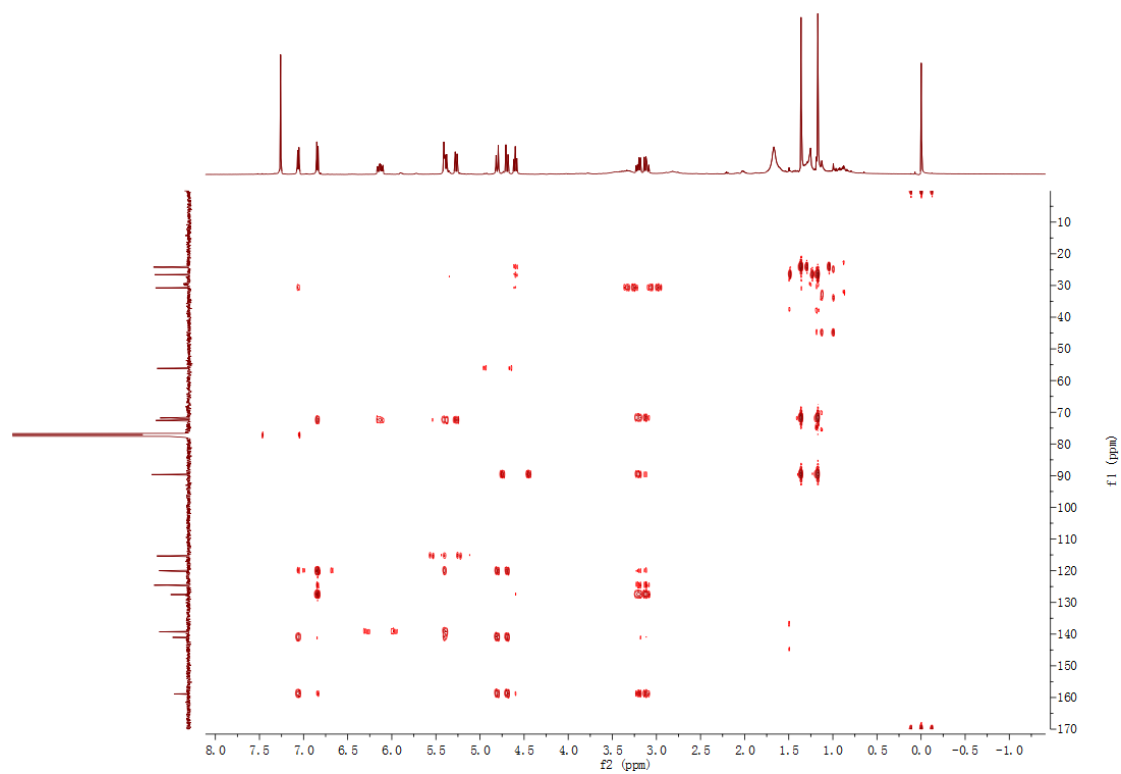

**Figure S17.** IR spectrum of **2**

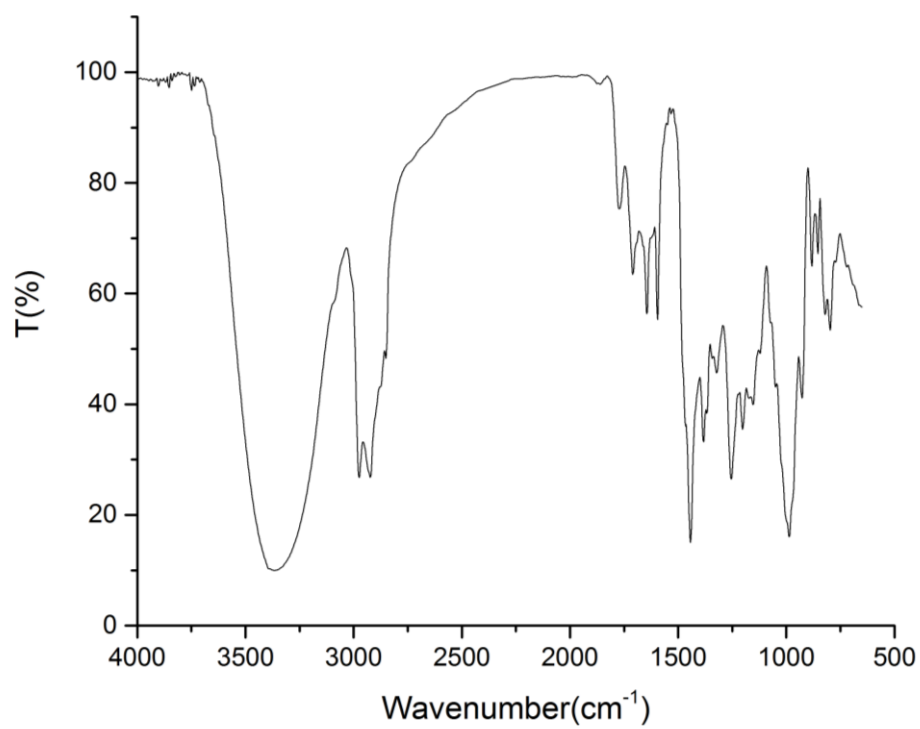

**Figure S18.** UV data of **2** in MeOH

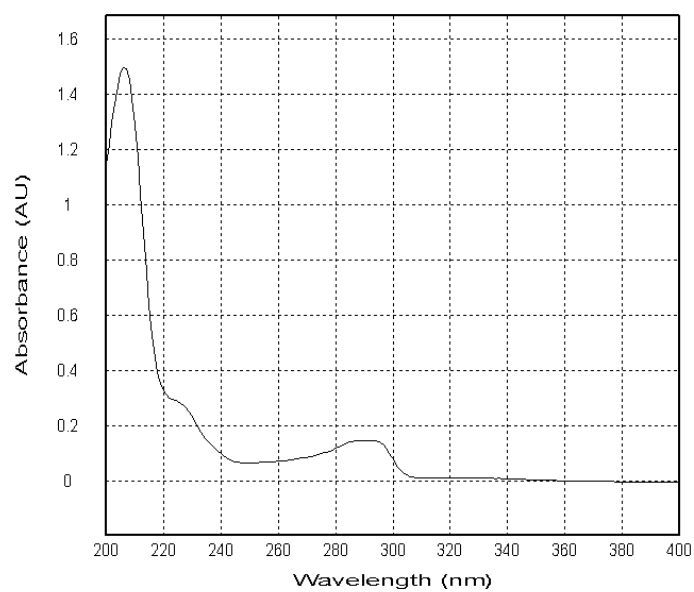

**Figure S19.** HRESIMS spectrum of **3**

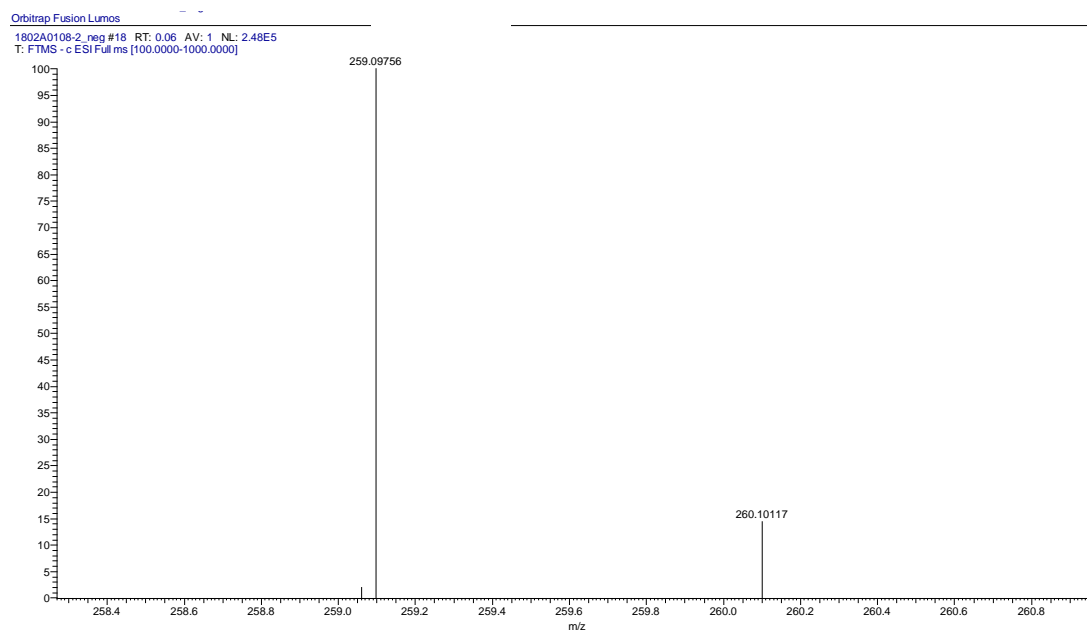

SPECTRUM -  
simulation :

| m/z       | Theo. Mass | Delta (ppm) | RDB equiv. | Composition                                    |
|-----------|------------|-------------|------------|------------------------------------------------|
| 259.09756 | 259.09758  | -0.09       | 8.5        | C <sub>15</sub> H <sub>15</sub> O <sub>4</sub> |

**Figure S20.** <sup>1</sup>H NMR spectrum of **3** in CDCl<sub>3</sub>

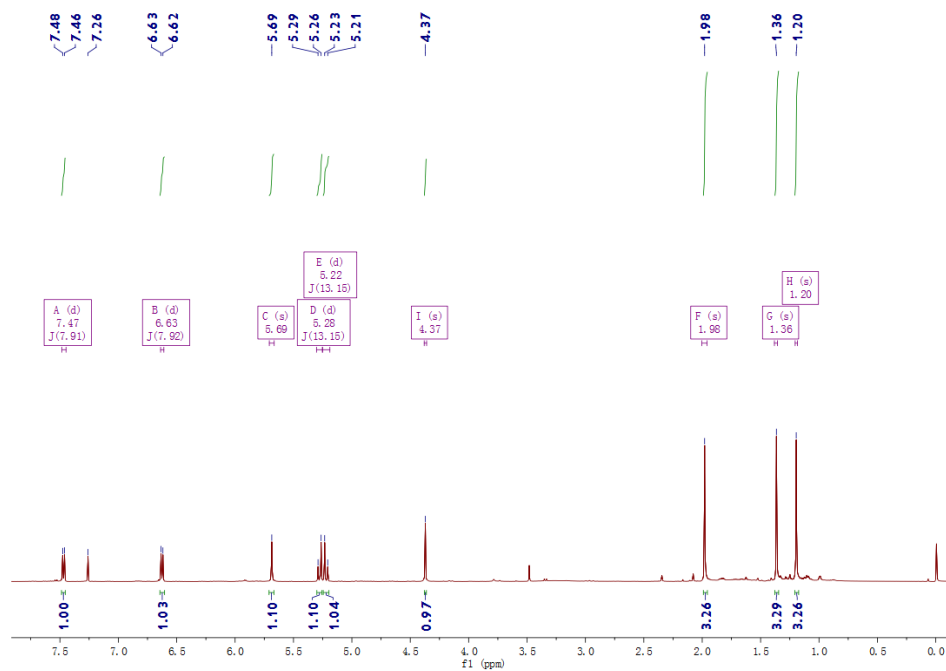

**Figure S21.**  $^{13}\text{C}$  NMR spectrum of **3** in  $\text{CDCl}_3$

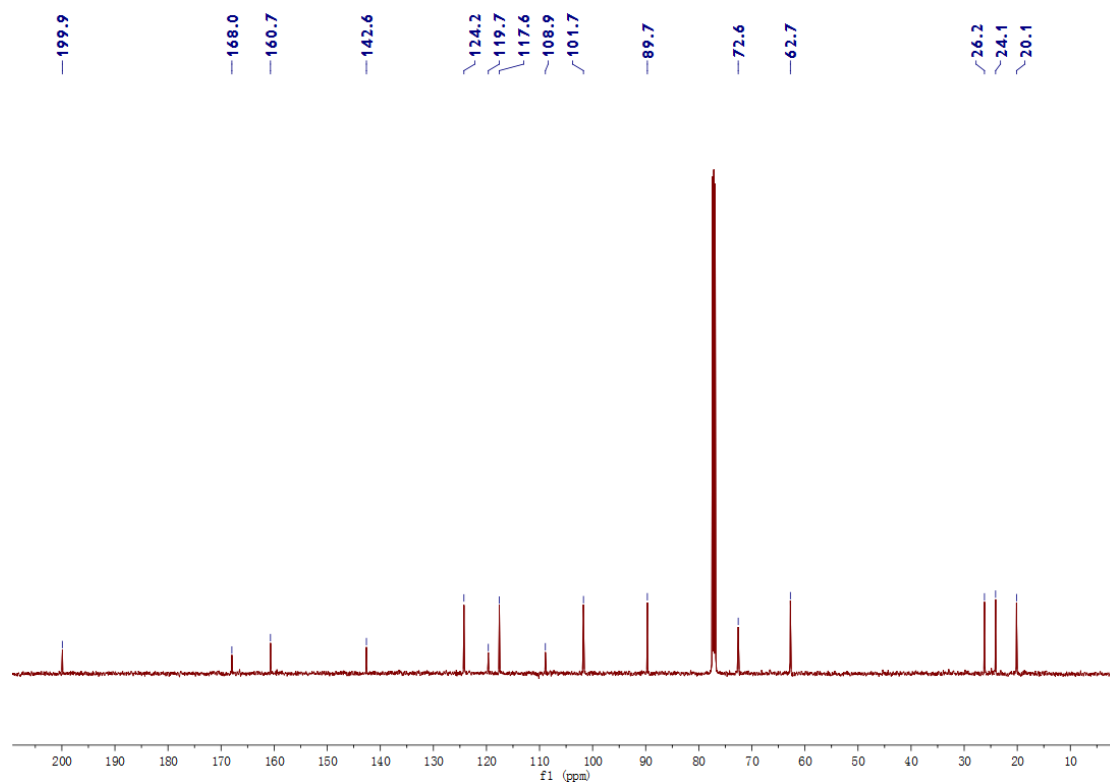

**Figure S22.** DEPT spectrum of **3** in  $\text{CDCl}_3$

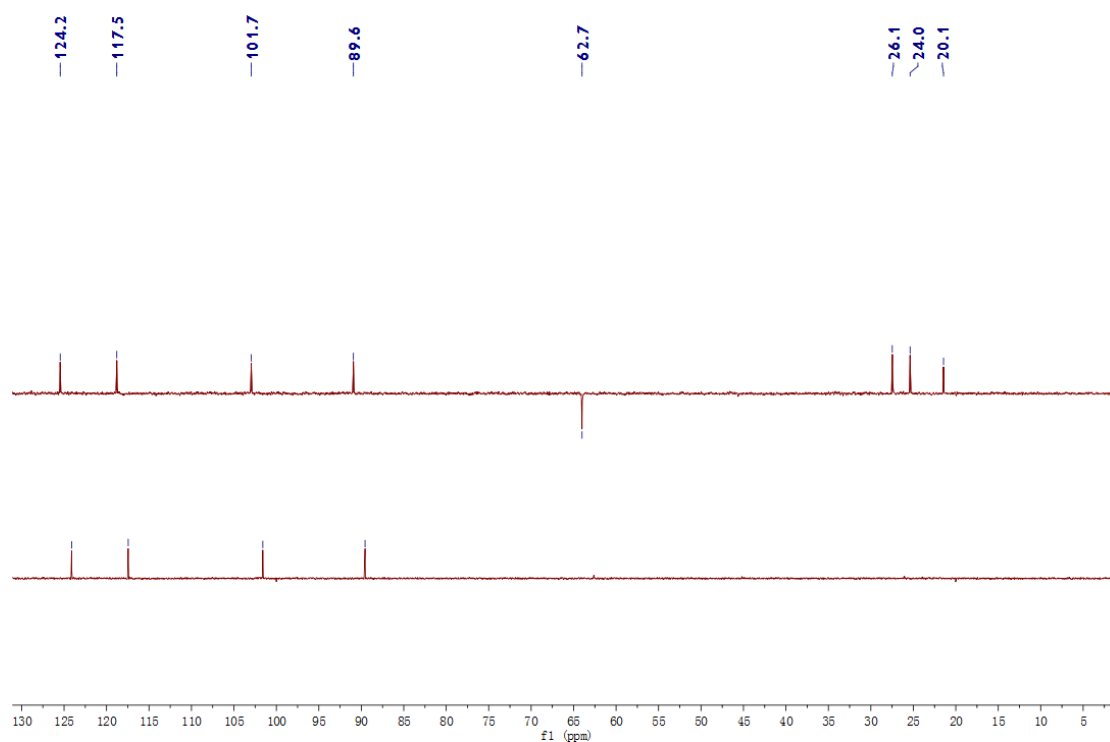

**Figure S23.**  $^1\text{H}$ - $^1\text{H}$  COSY spectrum of **3** in  $\text{CDCl}_3$

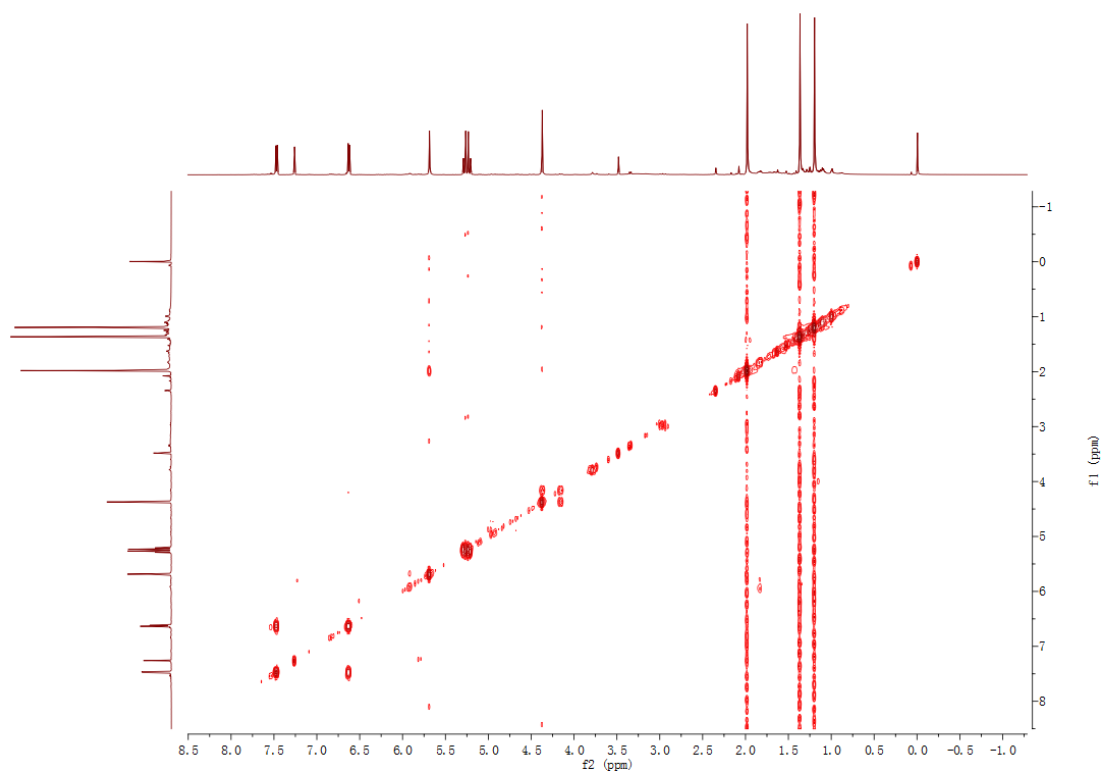

**Figure S24.** HSQC spectrum of **3** in  $\text{CDCl}_3$

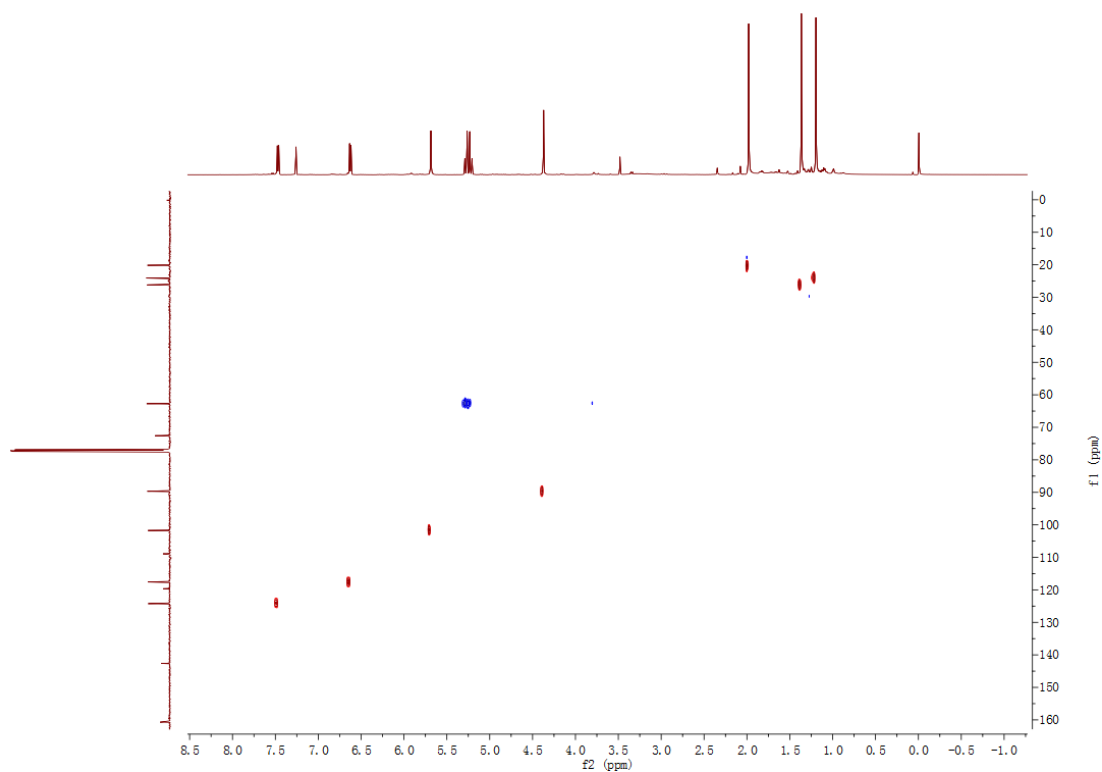

**Figure S25.** HMBC spectrum of **3** in CDCl<sub>3</sub>

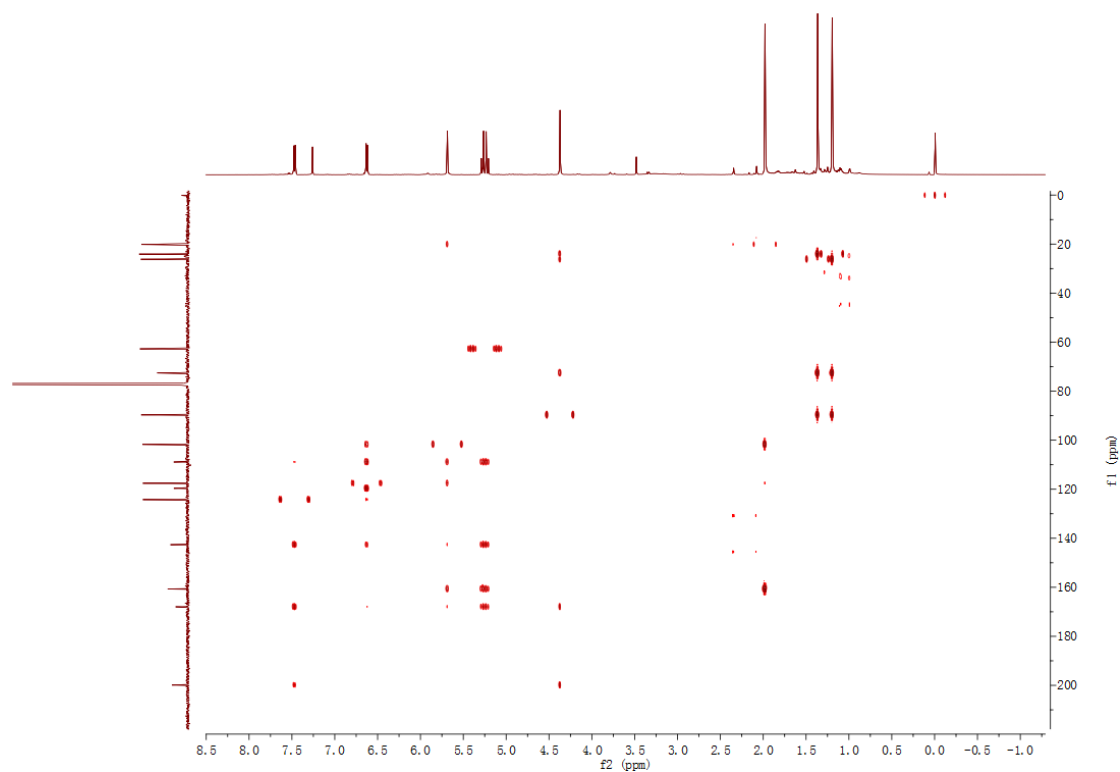

**Figure S26.** IR spectrum of **3**

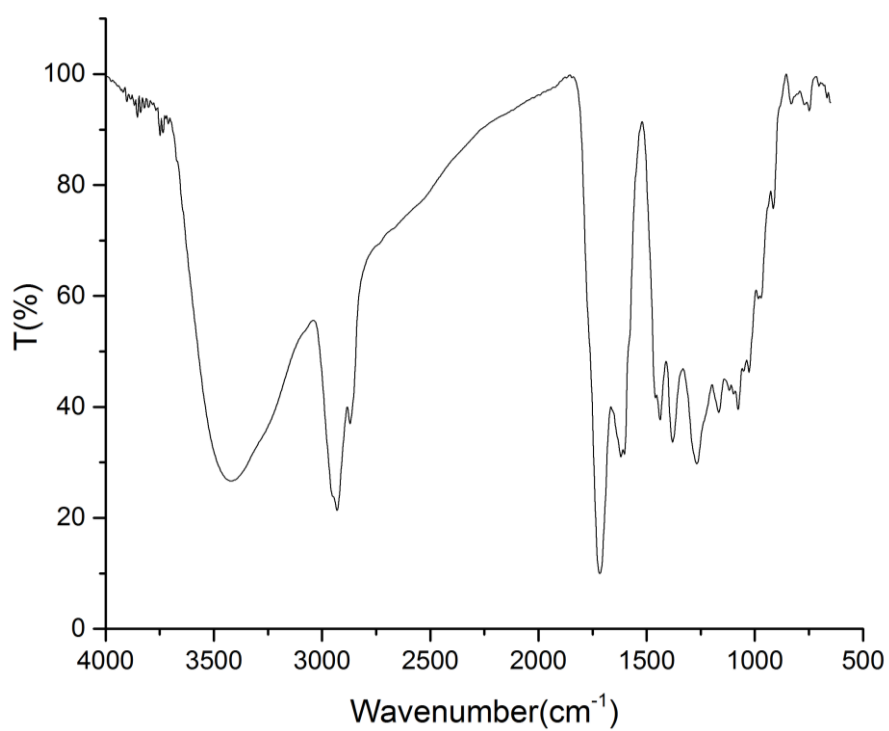

**Figure S27.** UV data of **3** in MeOH

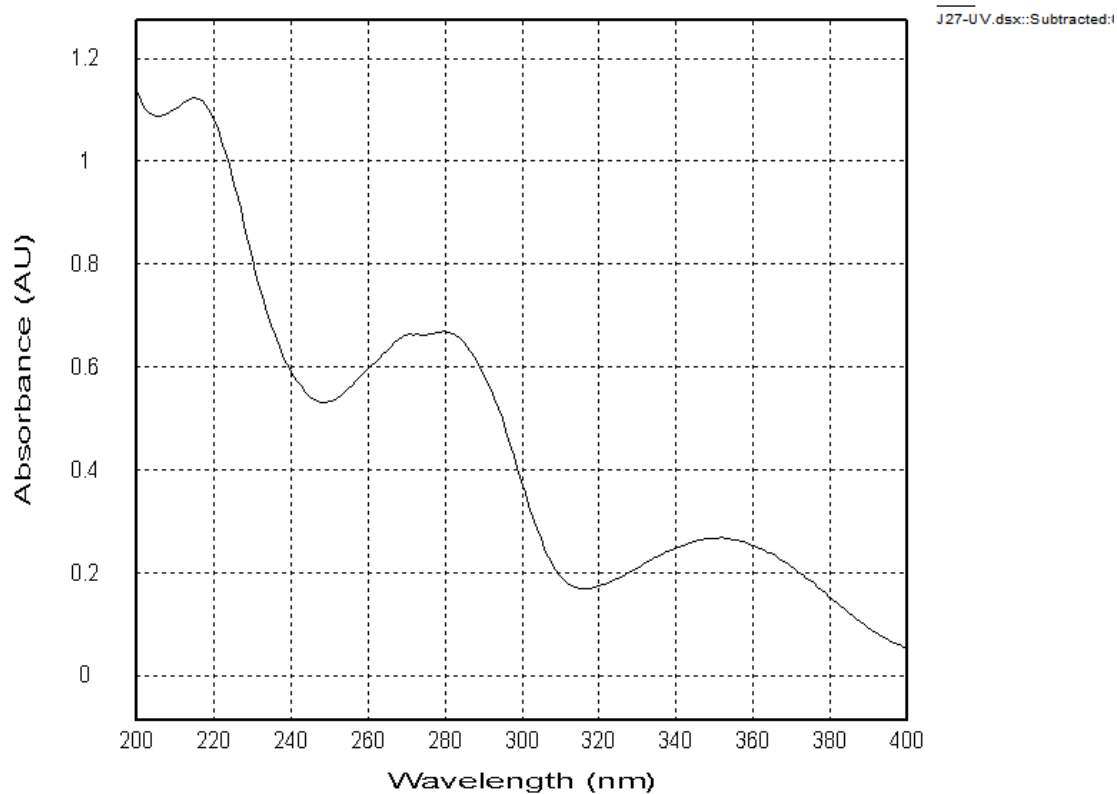

**Figure S28.** HRESIMS spectrum of **4**

1812A1539-2 #5-8 RT: 0.04-0.06 AV: 2 NL: 1.57E8  
F: FTMS + c APCI Full ms [100.0000-1000.0000]

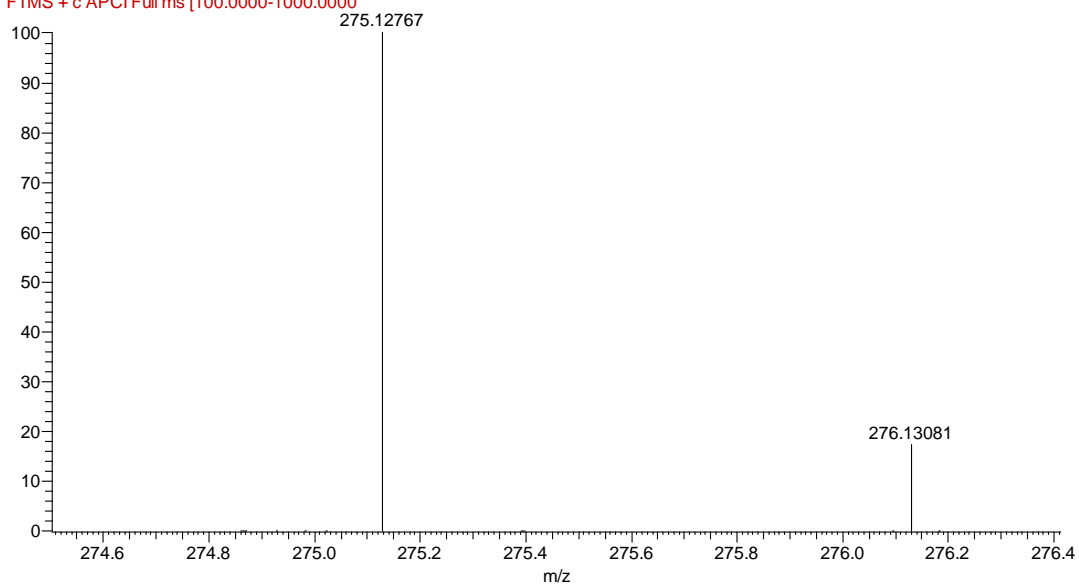

| m/z       | Theo. Mass | Delta (mmu) | RDB equiv. | Composition                                    |
|-----------|------------|-------------|------------|------------------------------------------------|
| 275.12767 | 275.12779  | -0.12       | 7.5        | C <sub>16</sub> H <sub>19</sub> O <sub>4</sub> |

**Figure S29.**  $^1\text{H}$  NMR spectrum of **4** in  $\text{CDCl}_3$

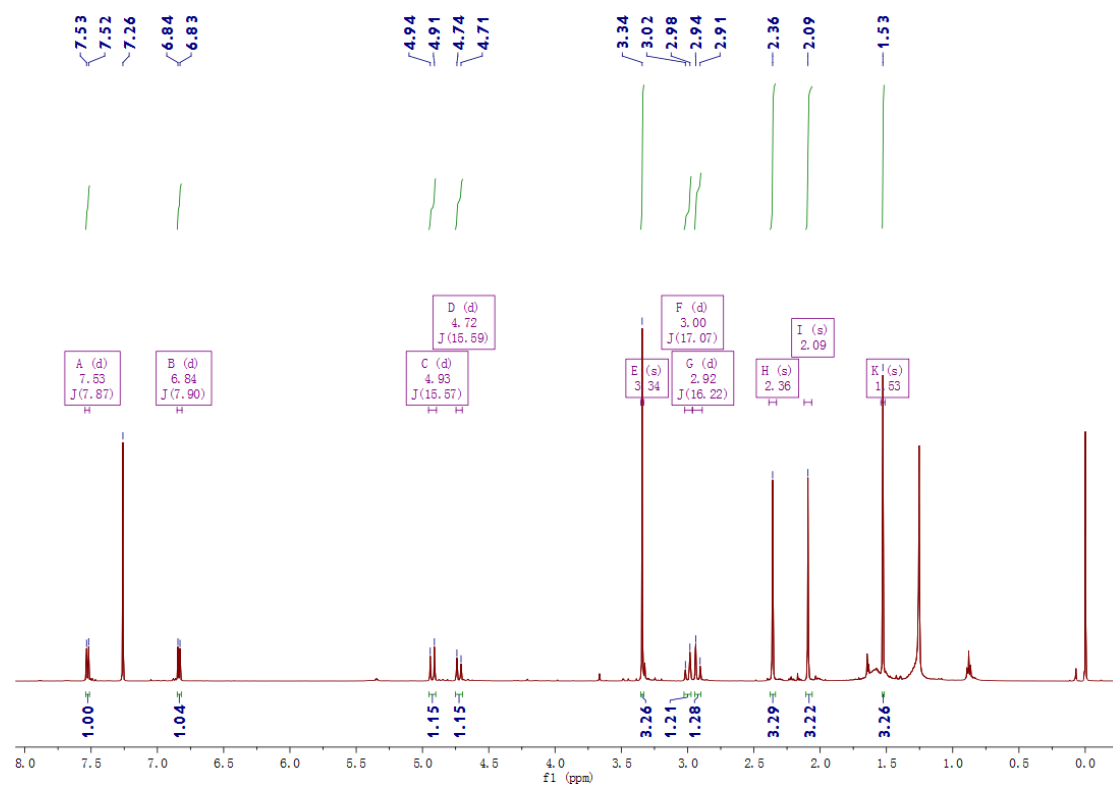

**Figure S30.**  $^{13}\text{C}$  NMR spectrum of **4** in  $\text{CDCl}_3$

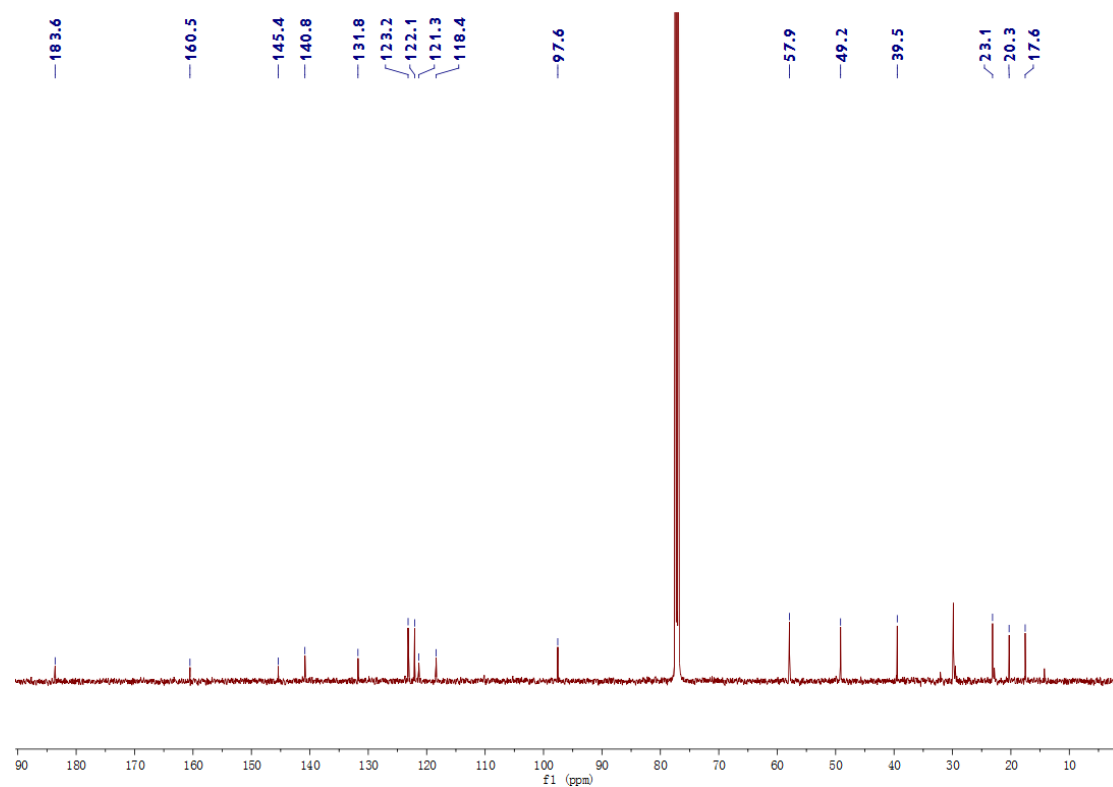

**Figure S31.**  $^1\text{H}$ - $^1\text{H}$  COSY spectrum of **4** in  $\text{CDCl}_3$

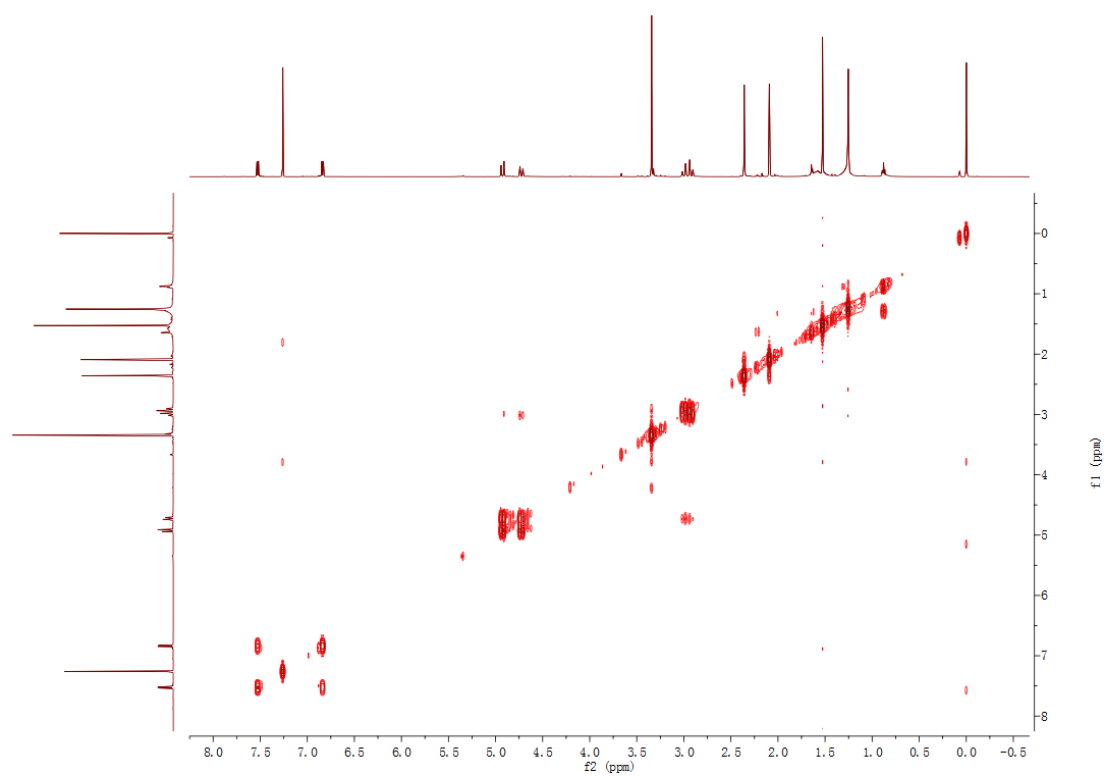

**Figure S32.** HSQC spectrum of **4** in  $\text{CDCl}_3$

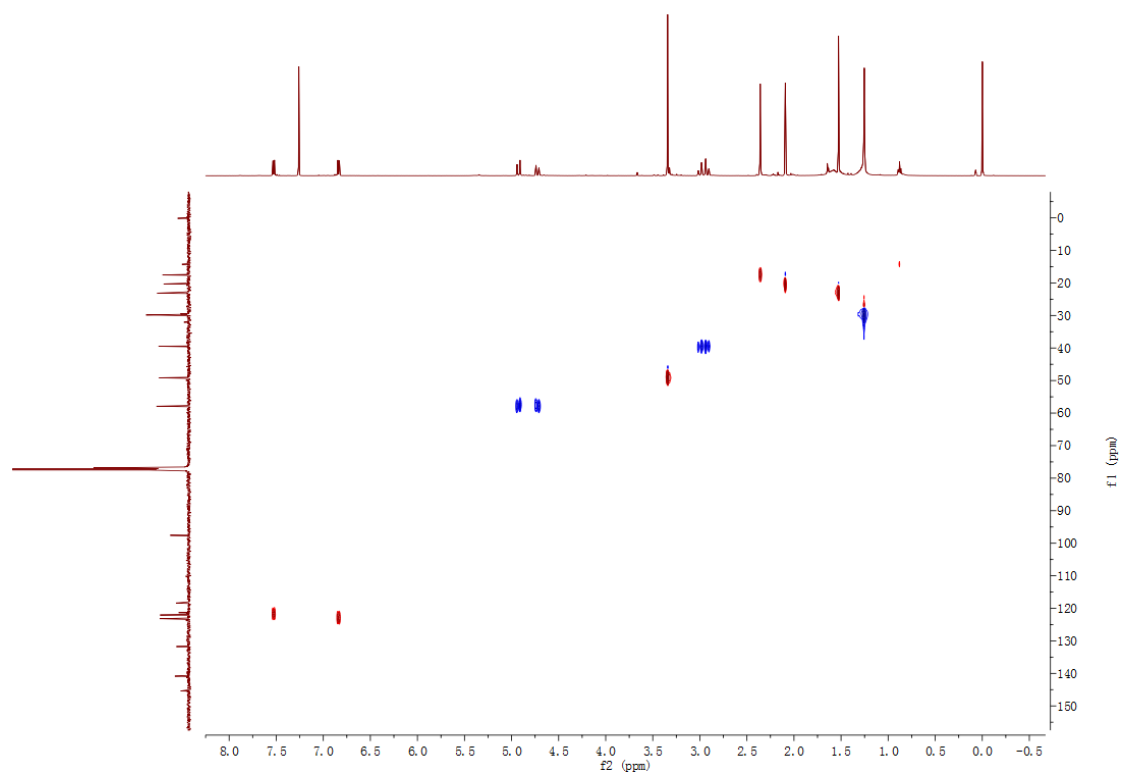

**Figure S33.** HMBC spectrum of **4** in  $\text{CDCl}_3$

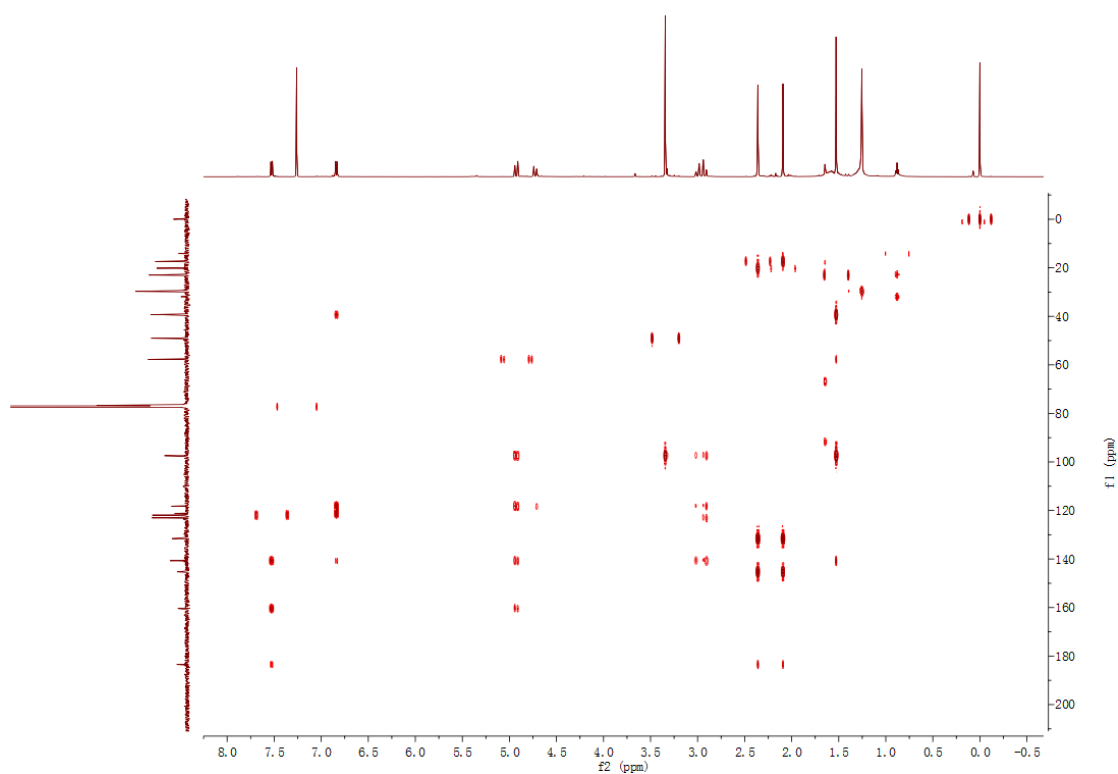

**Figure S34.** IR spectrum of **4**

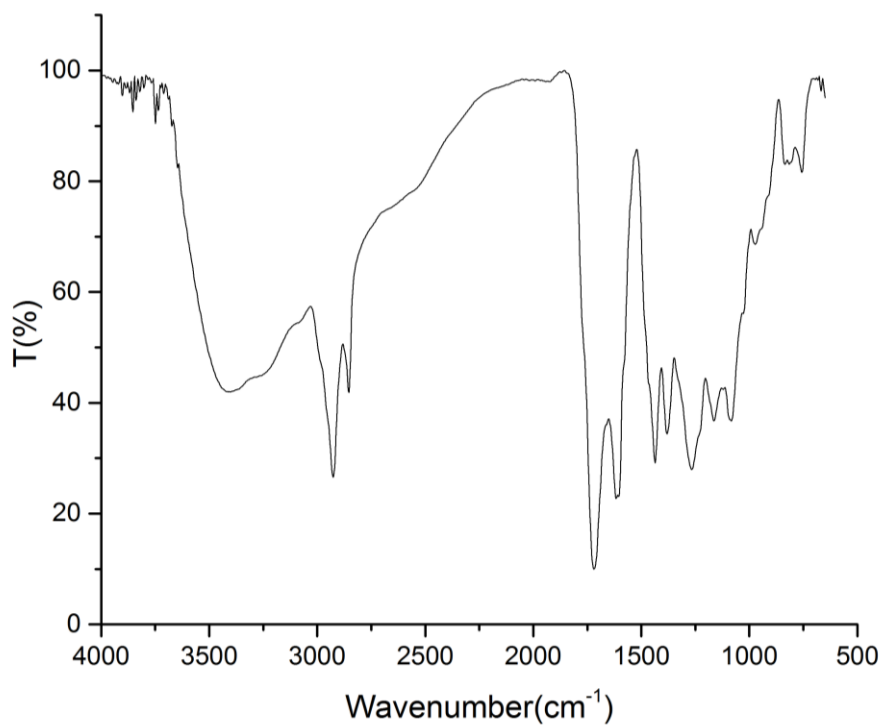

**Figure S35.** UV data of **4** in MeOH

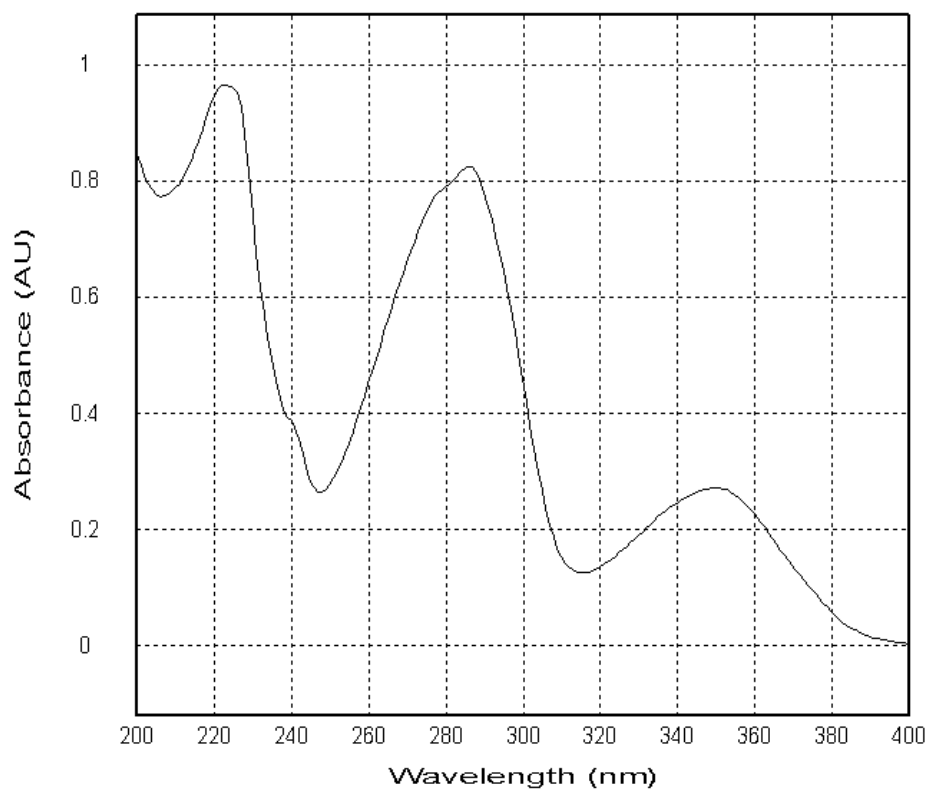

**Figure S36.** HRESIMS spectrum of **5**

1812A1539-3 #5-7 RT: 0.04-0.06 AV: 2 NL: 2.44E8  
F: FTMS + c APCI Full ms [100.0000-1000.0000]

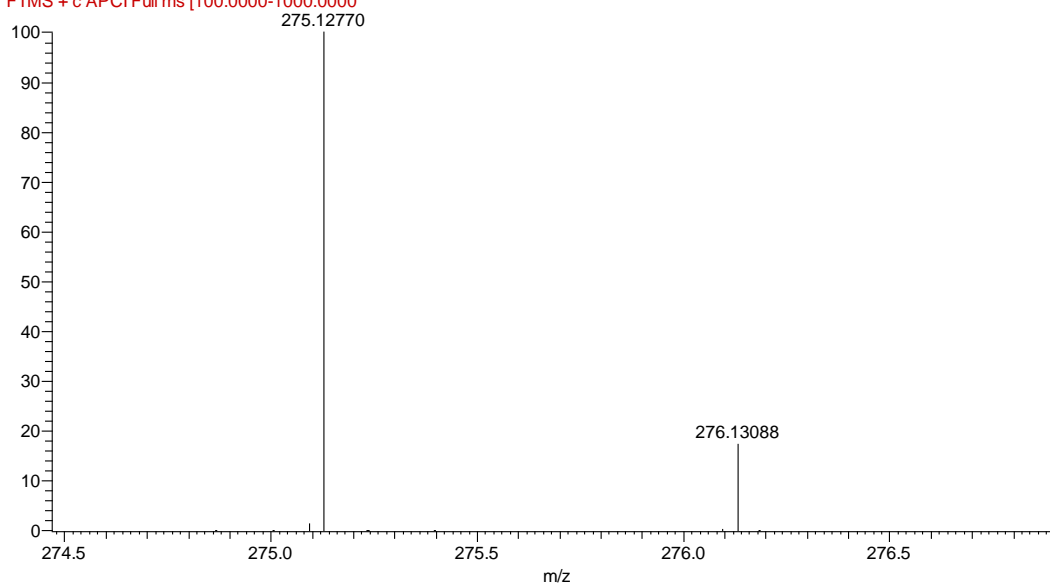

| m/z       | Theo. Mass | Delta (mmu) | RDB equiv. | Composition                                    |
|-----------|------------|-------------|------------|------------------------------------------------|
| 275.12770 | 275.12779  | -0.09       | 7.5        | C <sub>16</sub> H <sub>19</sub> O <sub>4</sub> |

**Figure S37.**  $^1\text{H}$  NMR spectrum of **5** in  $\text{CDCl}_3$

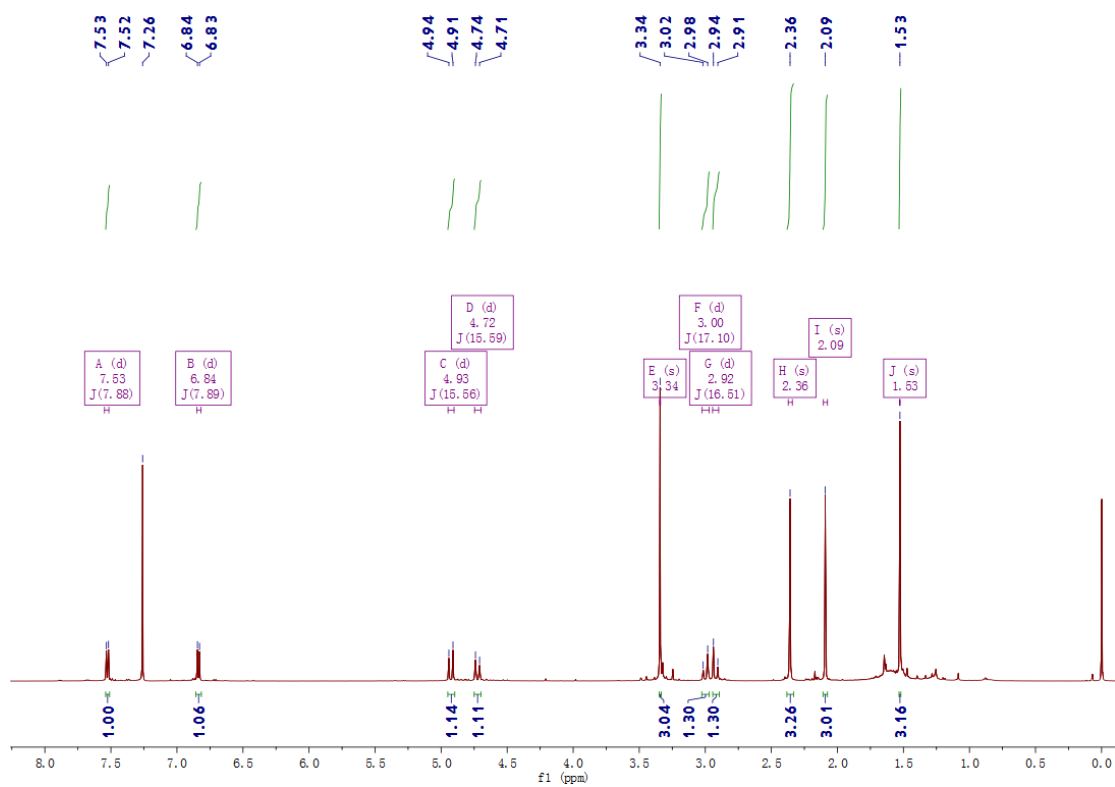

**Figure S38.**  $^{13}\text{C}$  NMR spectrum of **5** in  $\text{CDCl}_3$

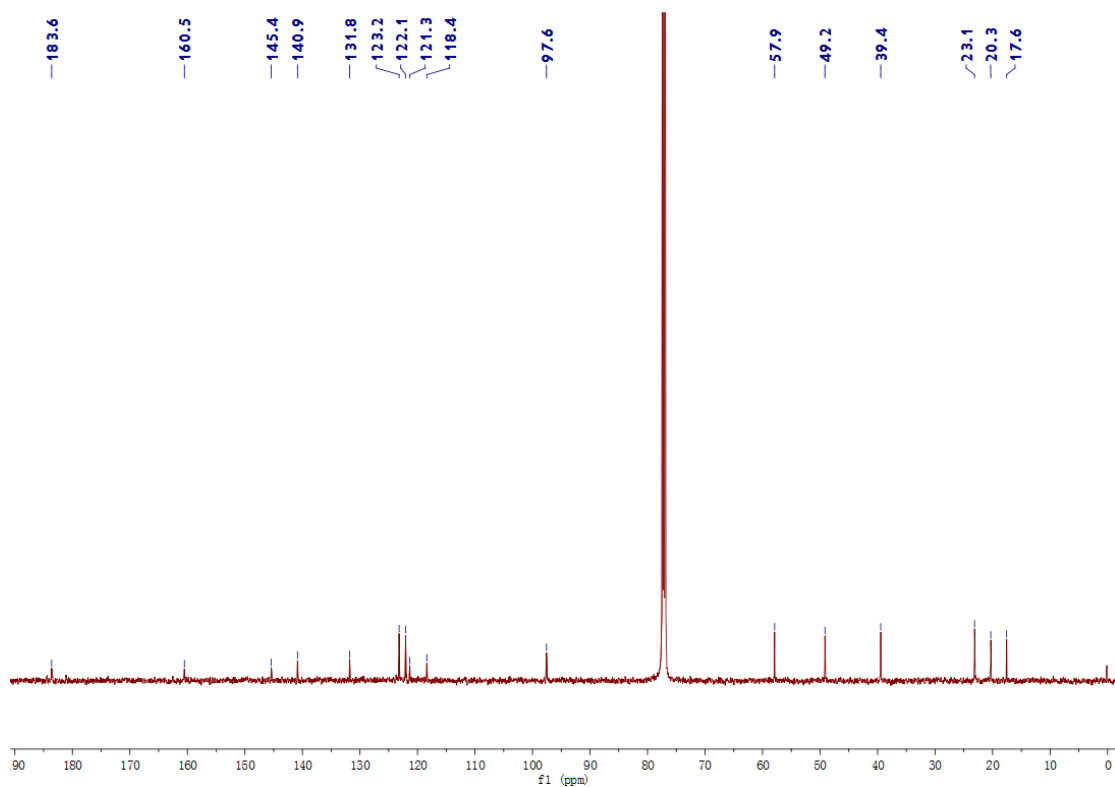

**Figure S39.**  $^1\text{H}$ - $^1\text{H}$  COSY spectrum of **5** in  $\text{CDCl}_3$

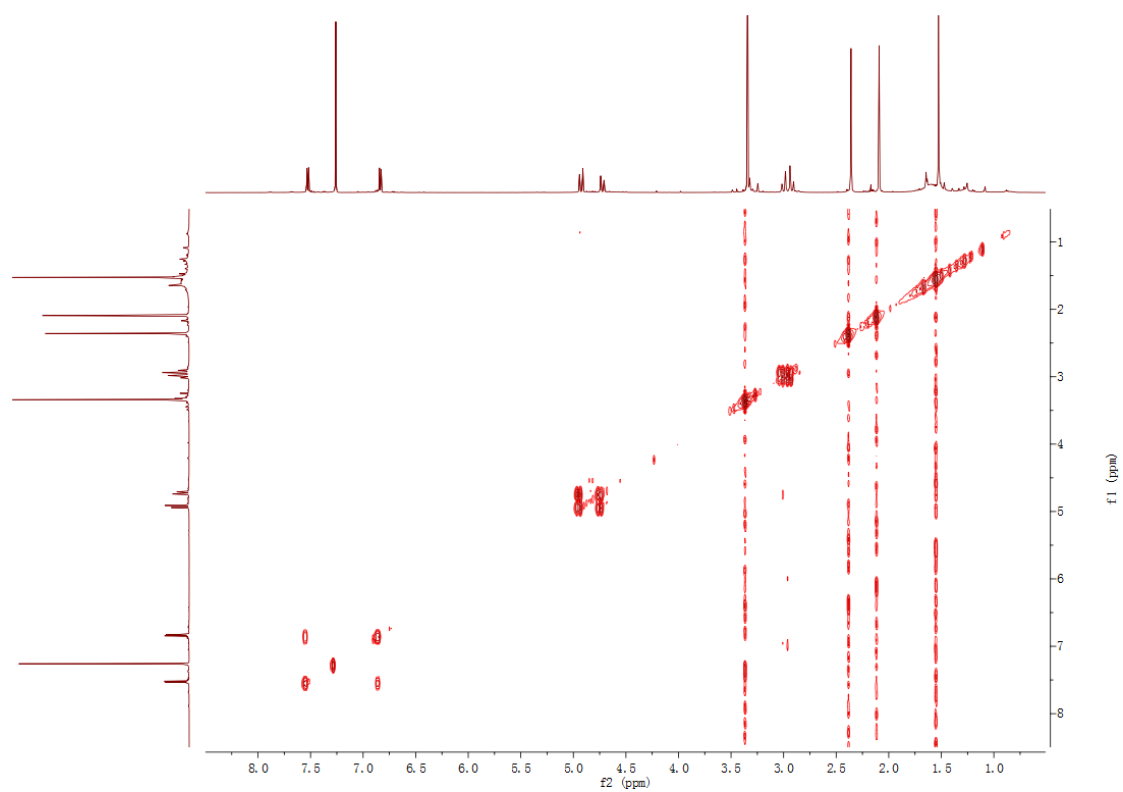

**Figure S40.** HSQC spectrum of **5** in  $\text{CDCl}_3$

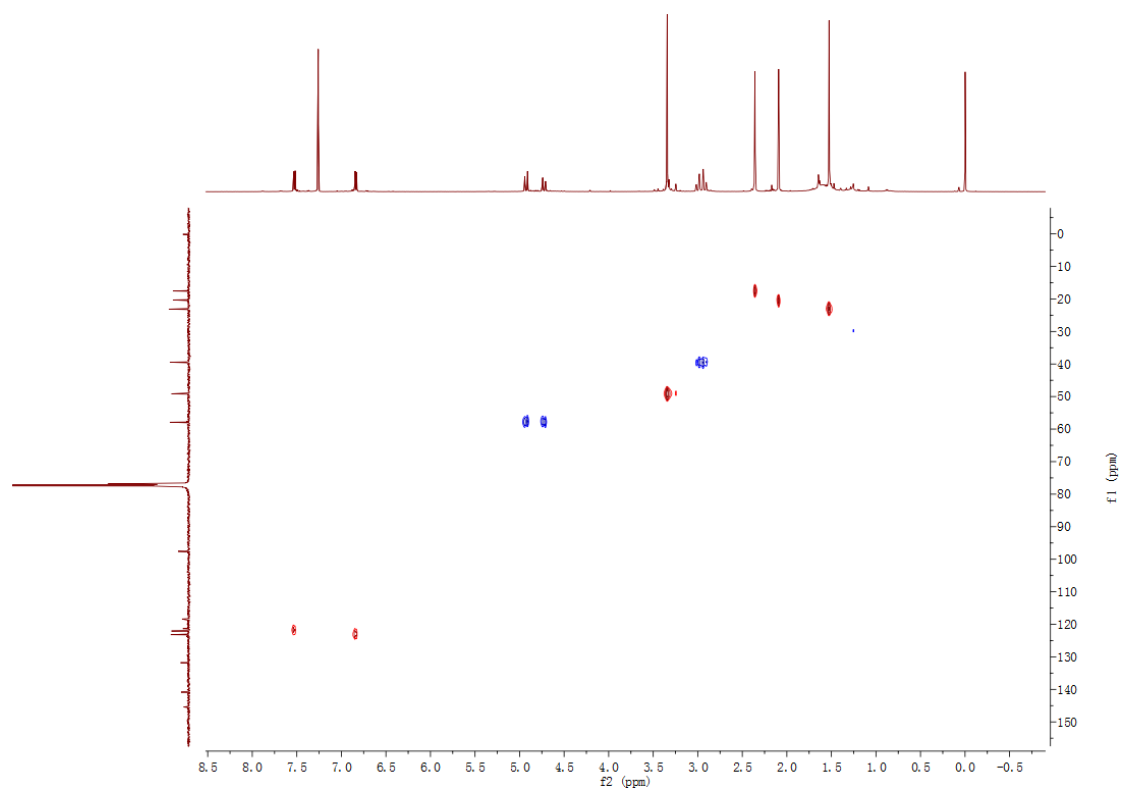

**Figure S41.** HMBC spectrum of **5** in CDCl<sub>3</sub>

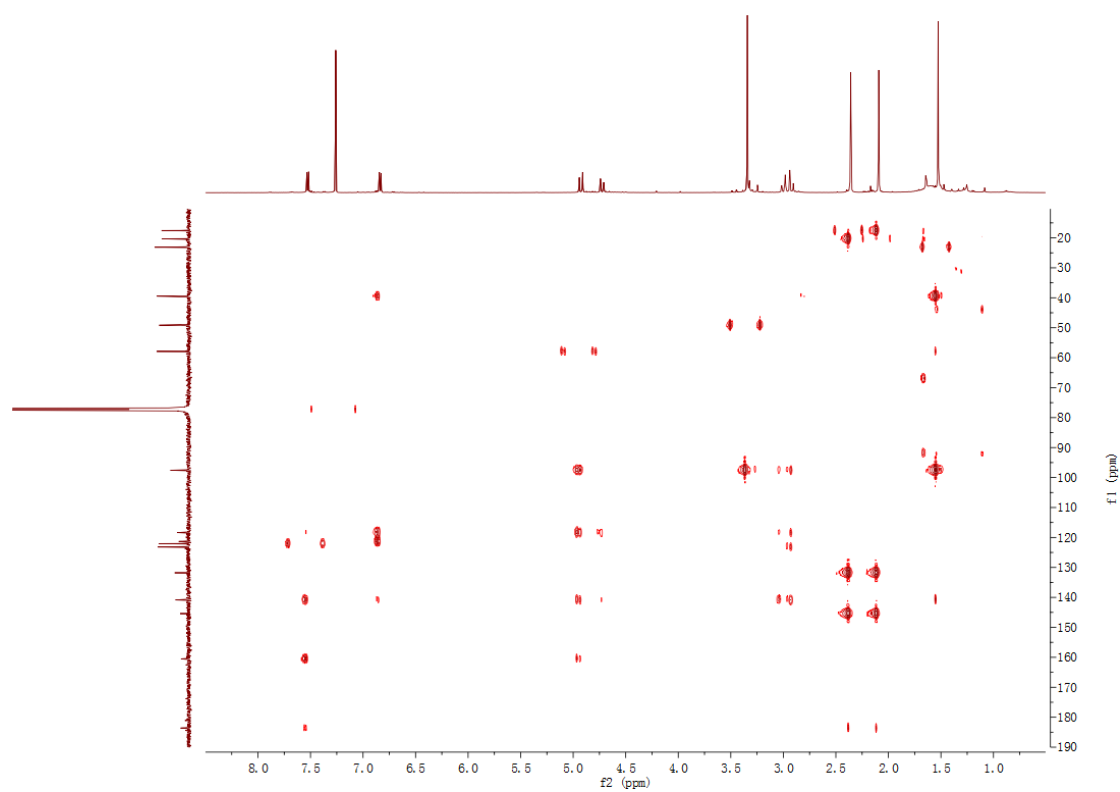

**Figure S42.** IR spectrum of **5**

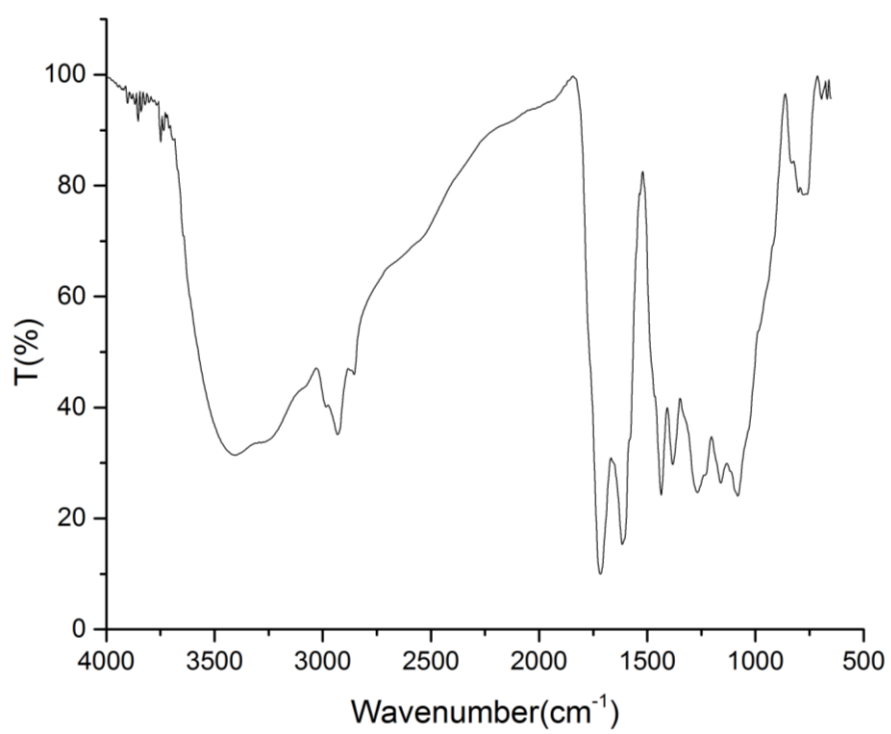

**Figure S43.** UV data of **5** in MeOH

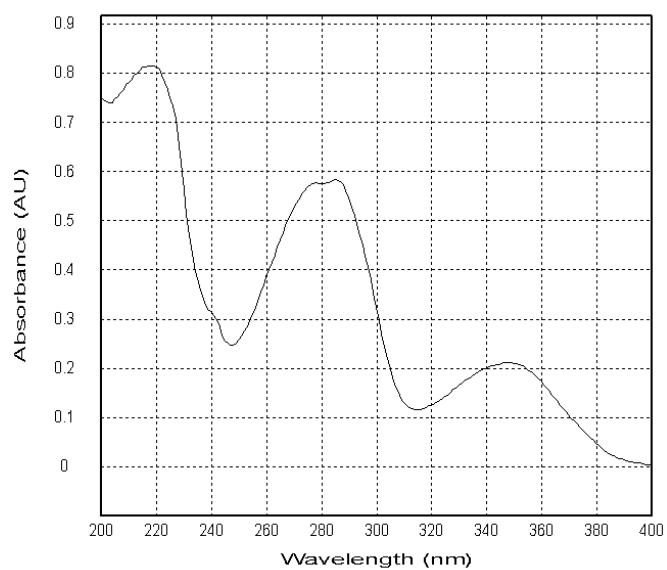

**Figure S44.** HRESIMS spectrum of **6**

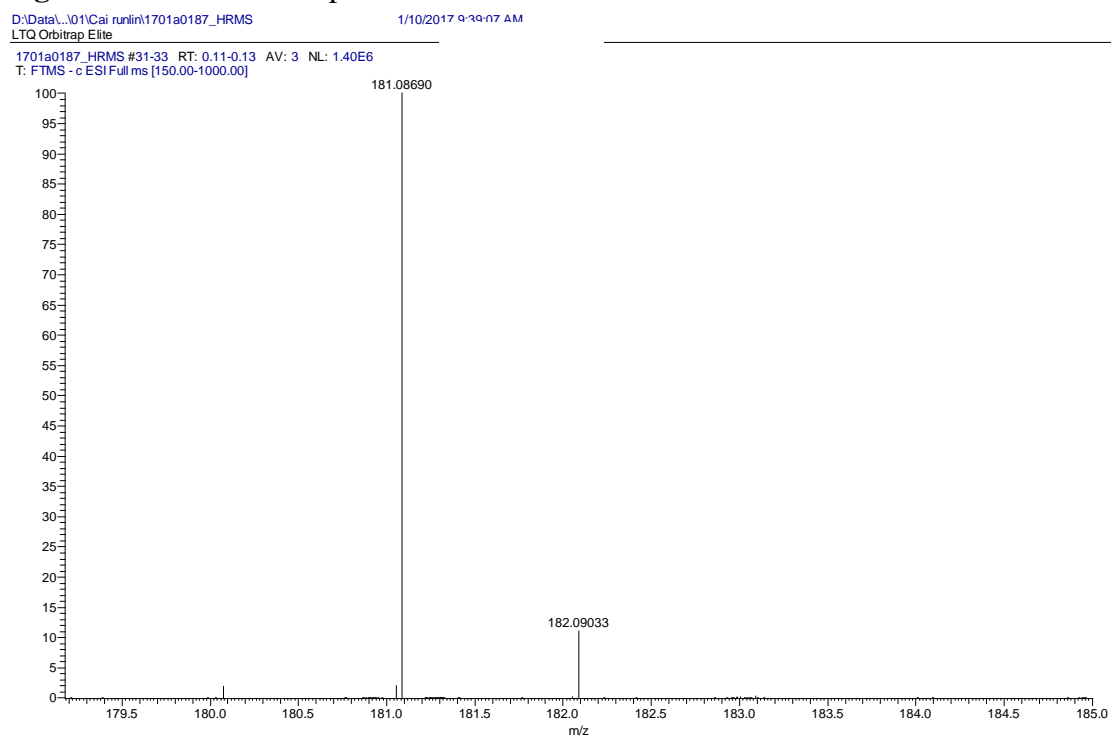

SPECTRUM - simulation :

| m/z       | Theo. Mass | Delta (ppm) | RDB equiv. | Composition                                    |
|-----------|------------|-------------|------------|------------------------------------------------|
| 181.08690 | 181.08702  | -0.65       | 4.5        | C <sub>10</sub> H <sub>13</sub> O <sub>3</sub> |

**Figure S45.**  $^1\text{H}$  NMR spectrum of **6** in acetone- $d_6$

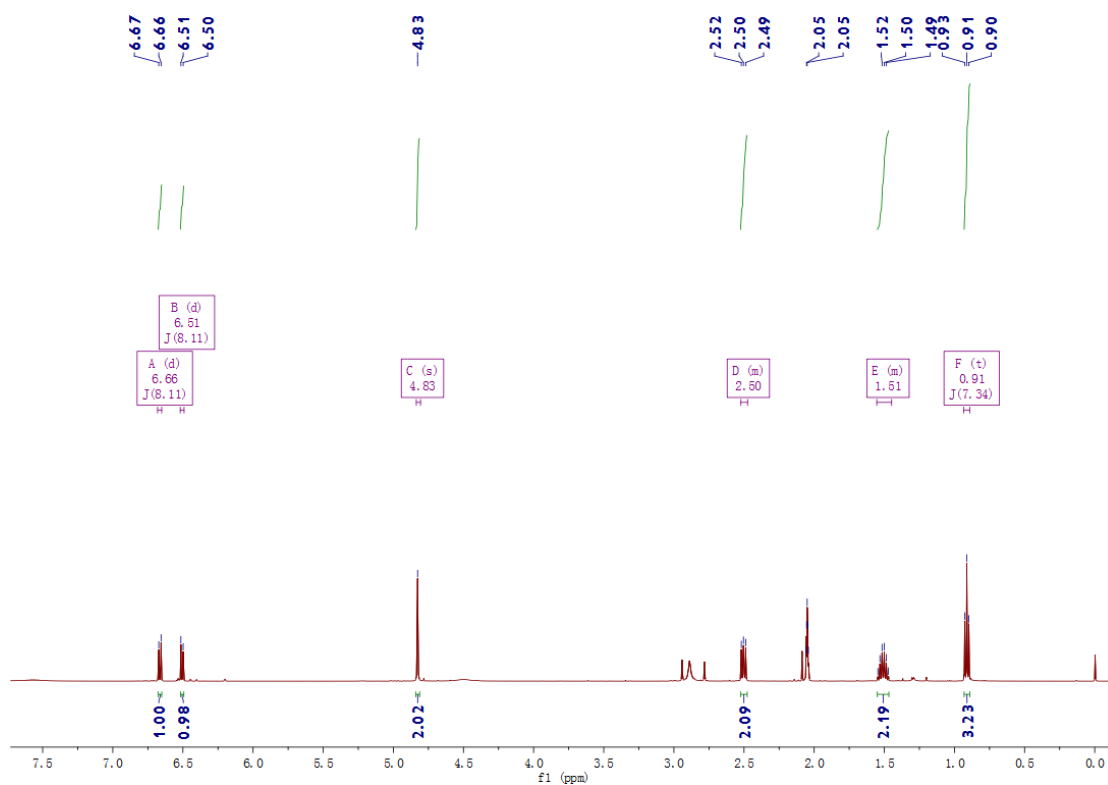

**Figure S46.**  $^{13}\text{C}$  NMR spectrum of **6** in acetone- $d_6$

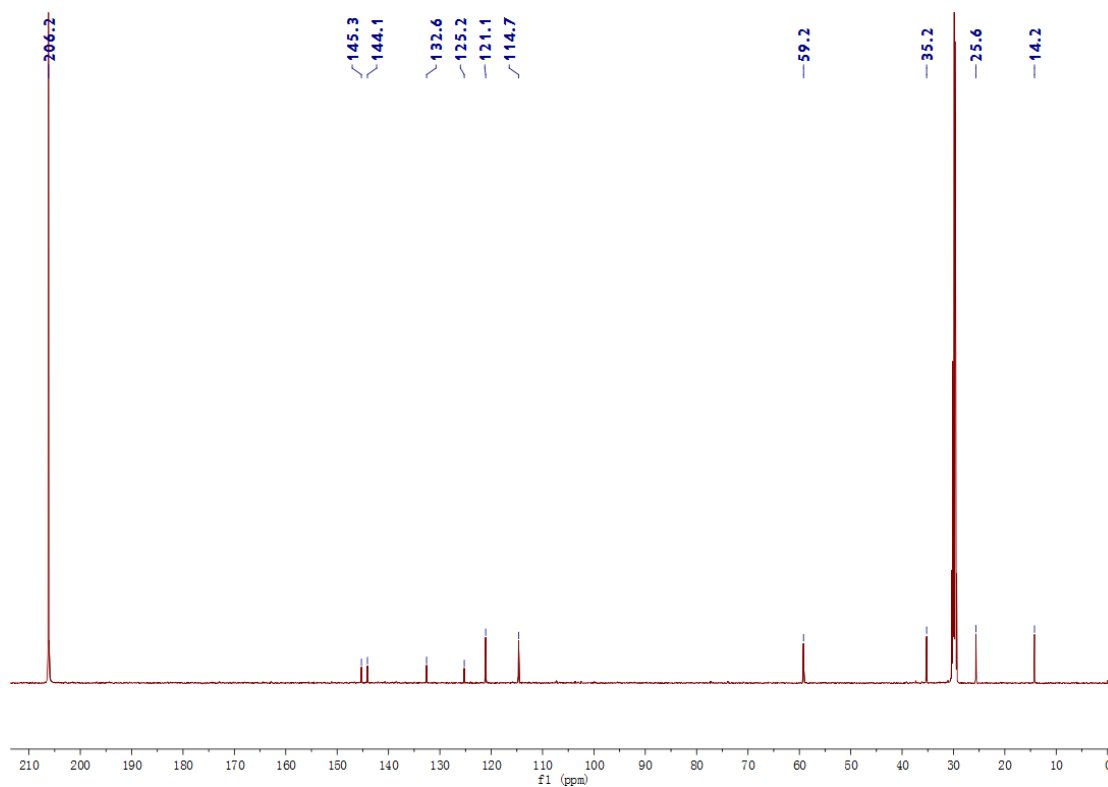

**Figure S47.** DEPT spectrum of **6** in acetone- $d_6$

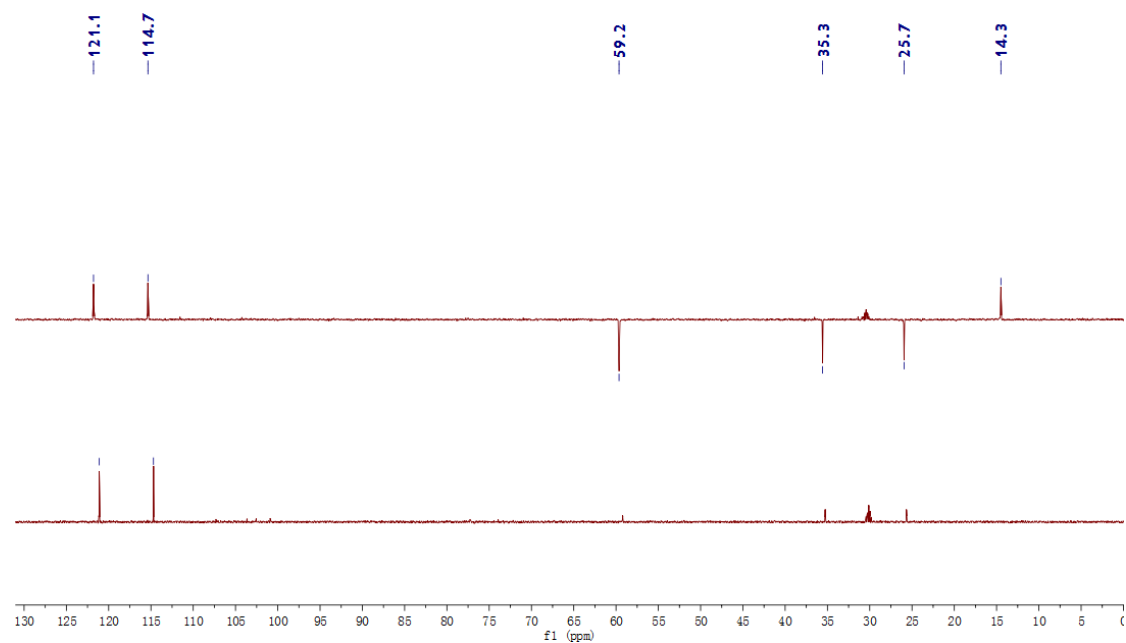

**Figure S48.**  $^1\text{H}$ - $^1\text{H}$  COSY spectrum of **6** in acetone- $d_6$

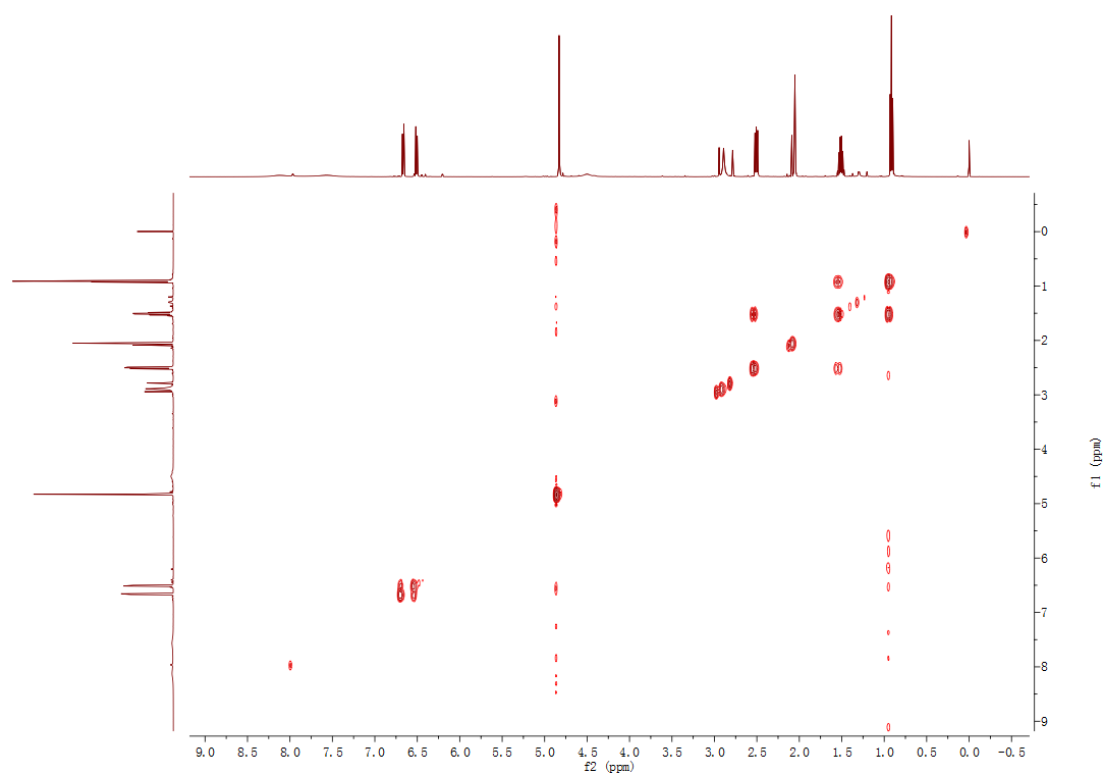

**Figure S49.** HSQC spectrum of **6** in acetone- $d_6$

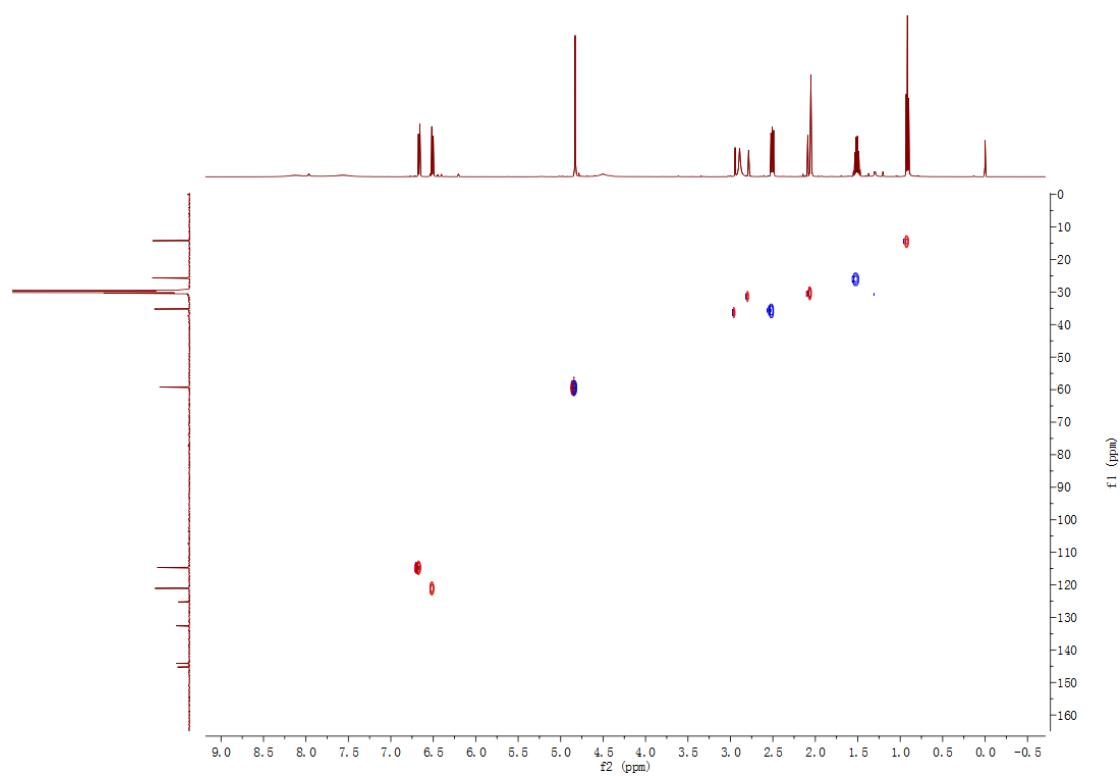

**Figure S50.** HMBC spectrum of **6** in acetone- $d_6$

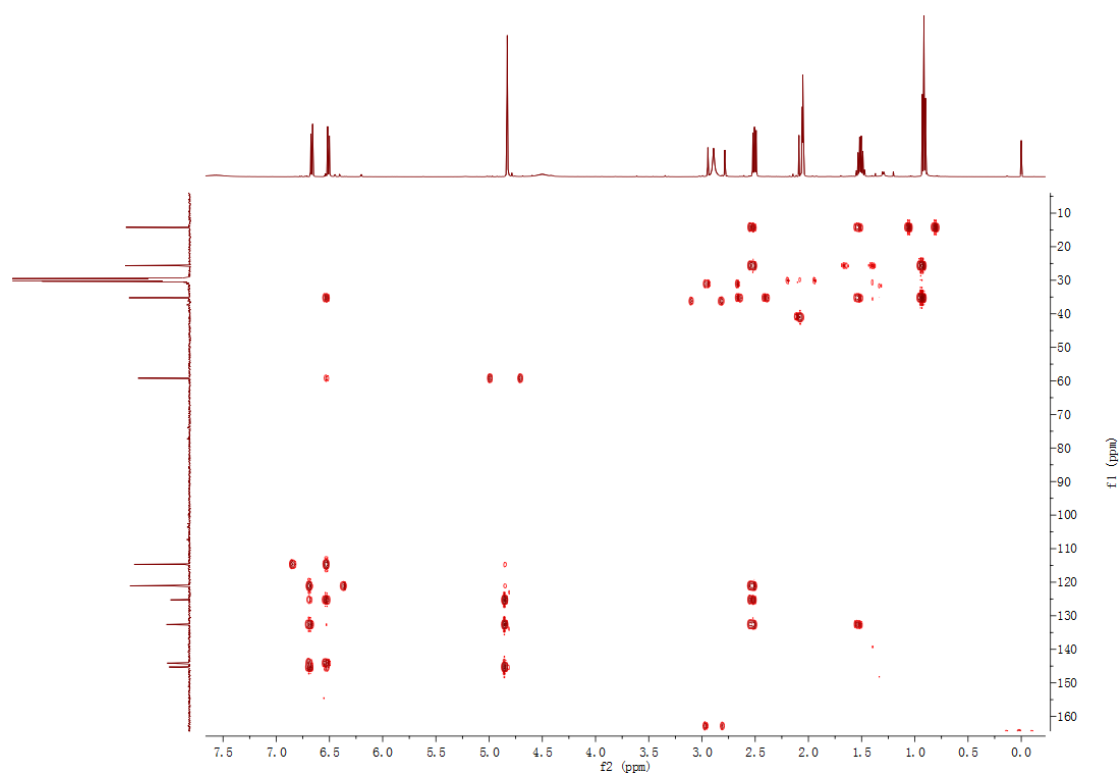

**Figure S51.** IR spectrum of **6**

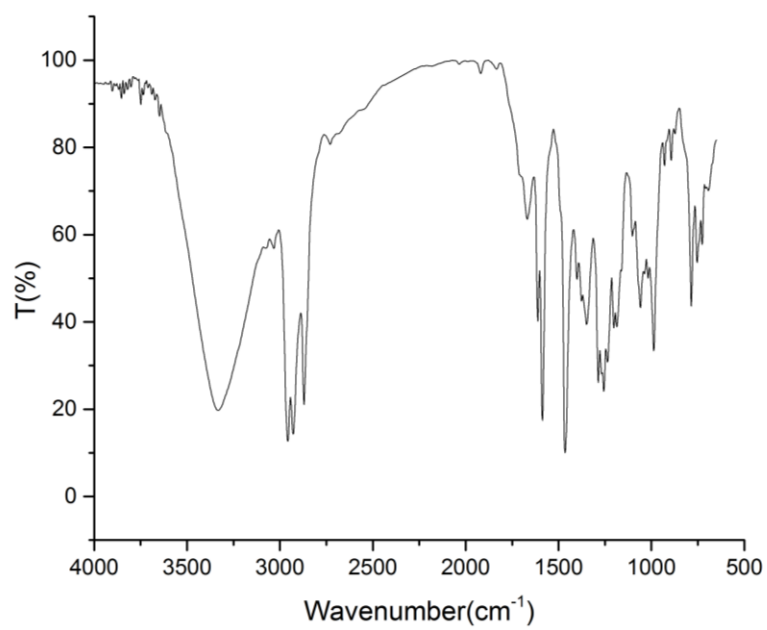

**Figure S52.** UV data of **6** in MeOH

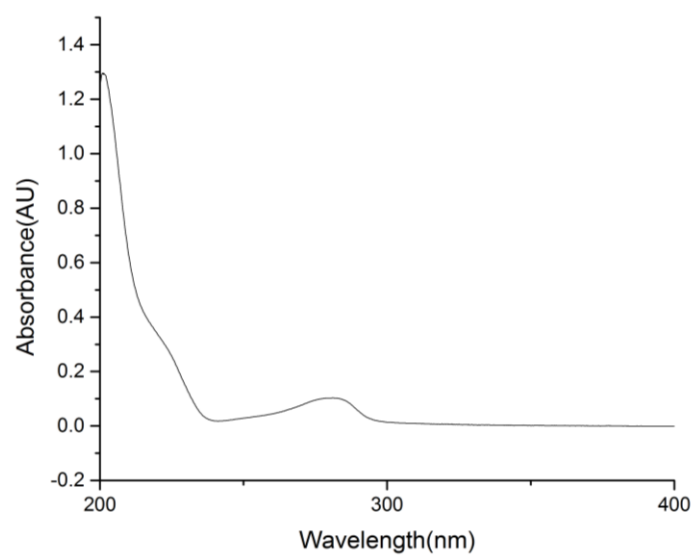

**Figure S53.** HRESIMS spectrum of **7**

1903A1296-3 #4-12 RT: 0.04-0.11 AV: 9 NL: 9.93E7  
T: FTMS + c ESI Full ms [150.0000-1500.0000]

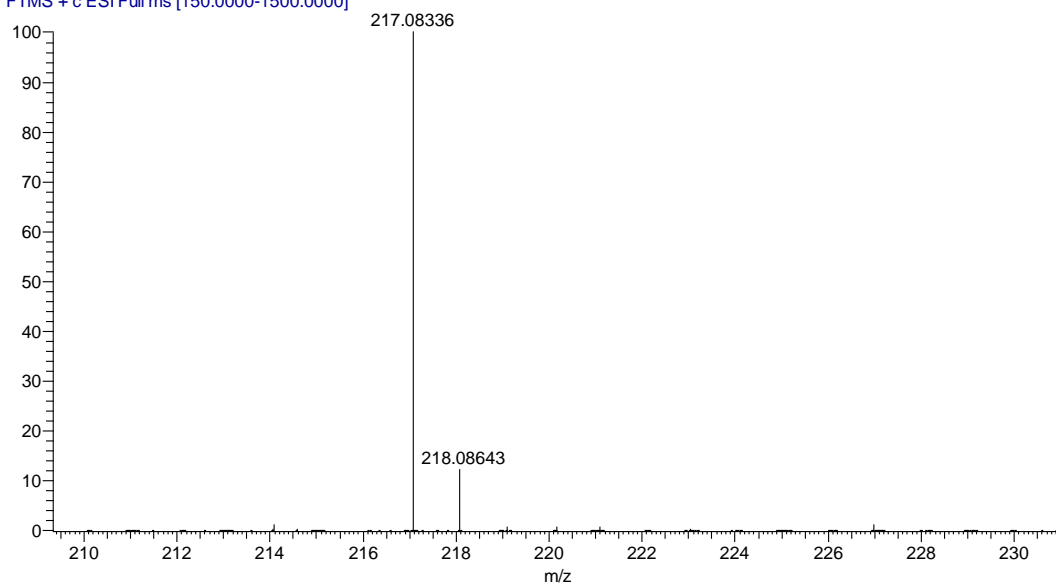

| m/z       | Theo. Mass | Delta (mmu) | RDB equiv. | Composition                                       |
|-----------|------------|-------------|------------|---------------------------------------------------|
| 217.08336 | 217.08352  | -0.16       | 4.5        | C <sub>11</sub> H <sub>14</sub> O <sub>3</sub> Na |

**Figure S54.** <sup>1</sup>H NMR spectrum of **7** in methanol-*d*<sub>4</sub>

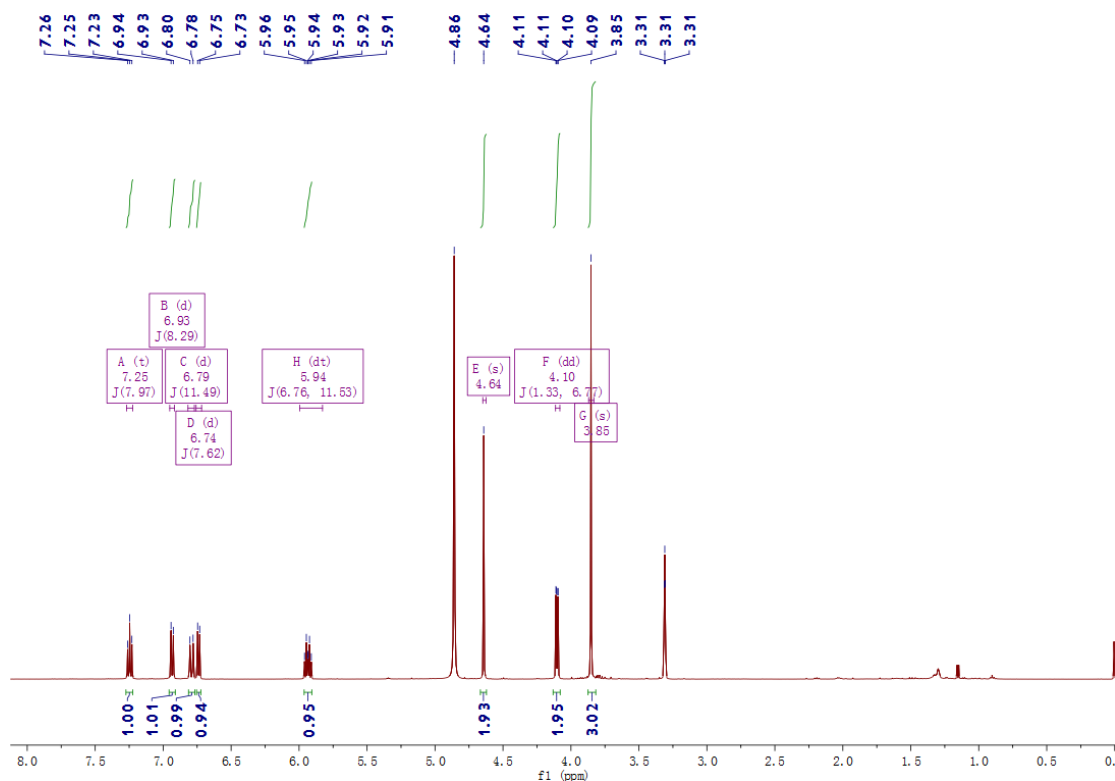

**Figure S55.**  $^{13}\text{C}$  NMR spectrum of **7** in methanol- $d_4$

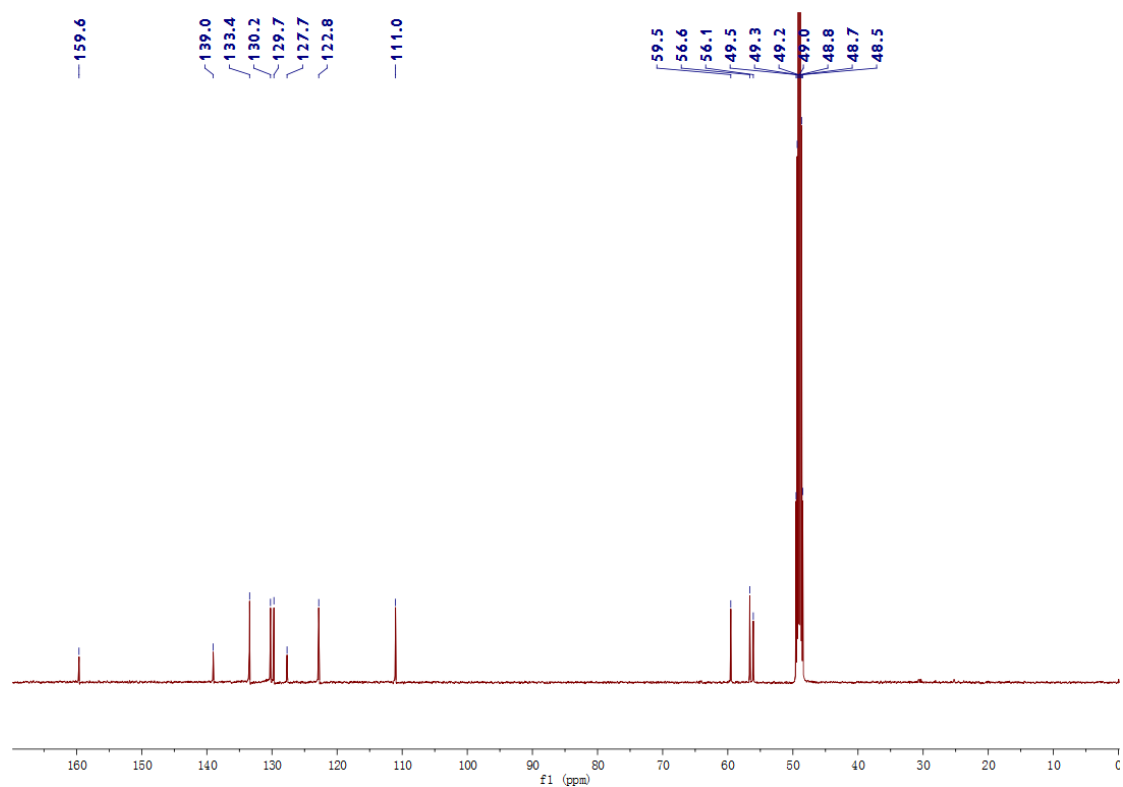

**Figure S56.** DEPT spectrum of **7** in methanol- $d_4$

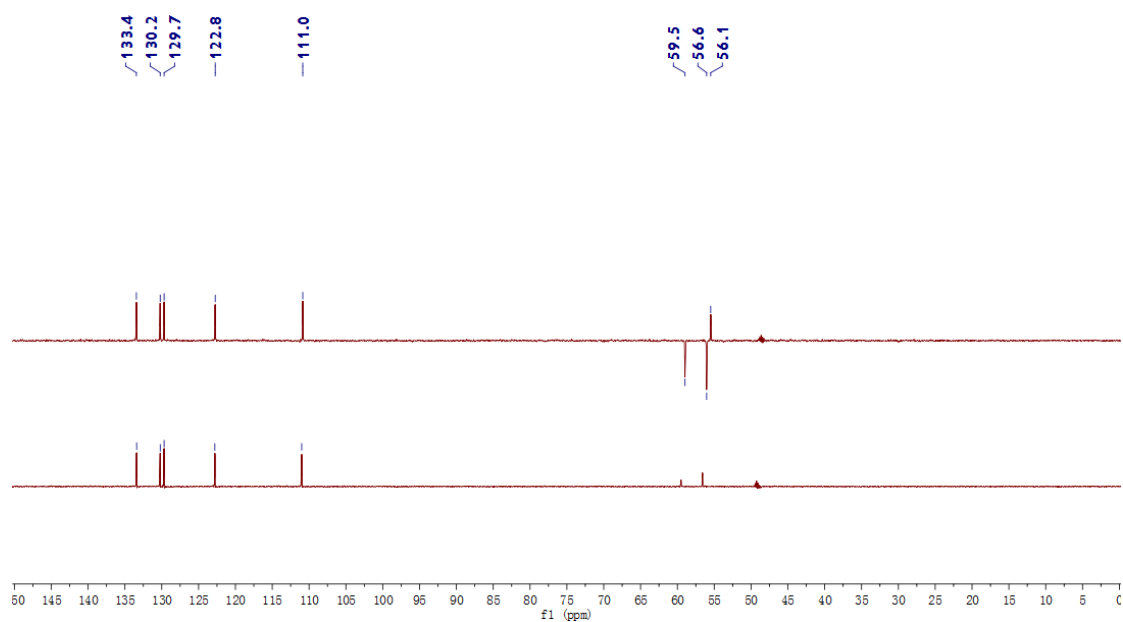

**Figure S57.**  $^1\text{H}$ - $^1\text{H}$  COSY spectrum of **7** in methanol- $d_4$

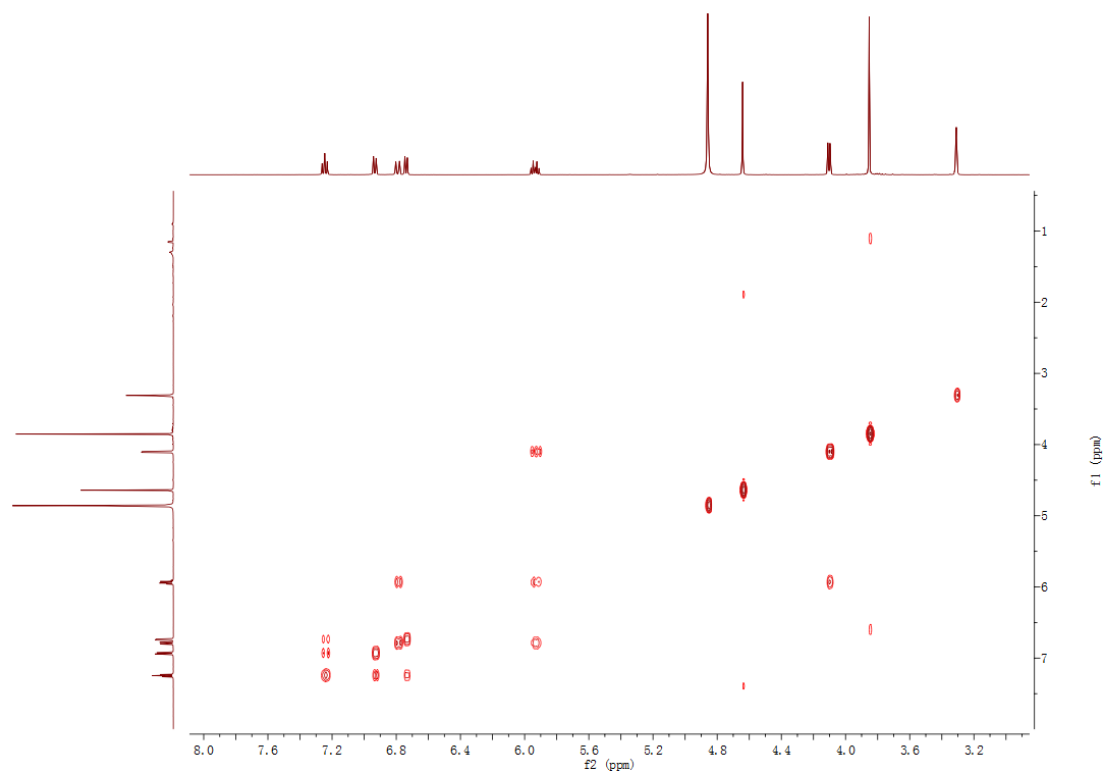

**Figure S58.** HSQC spectrum of **7** in methanol- $d_4$

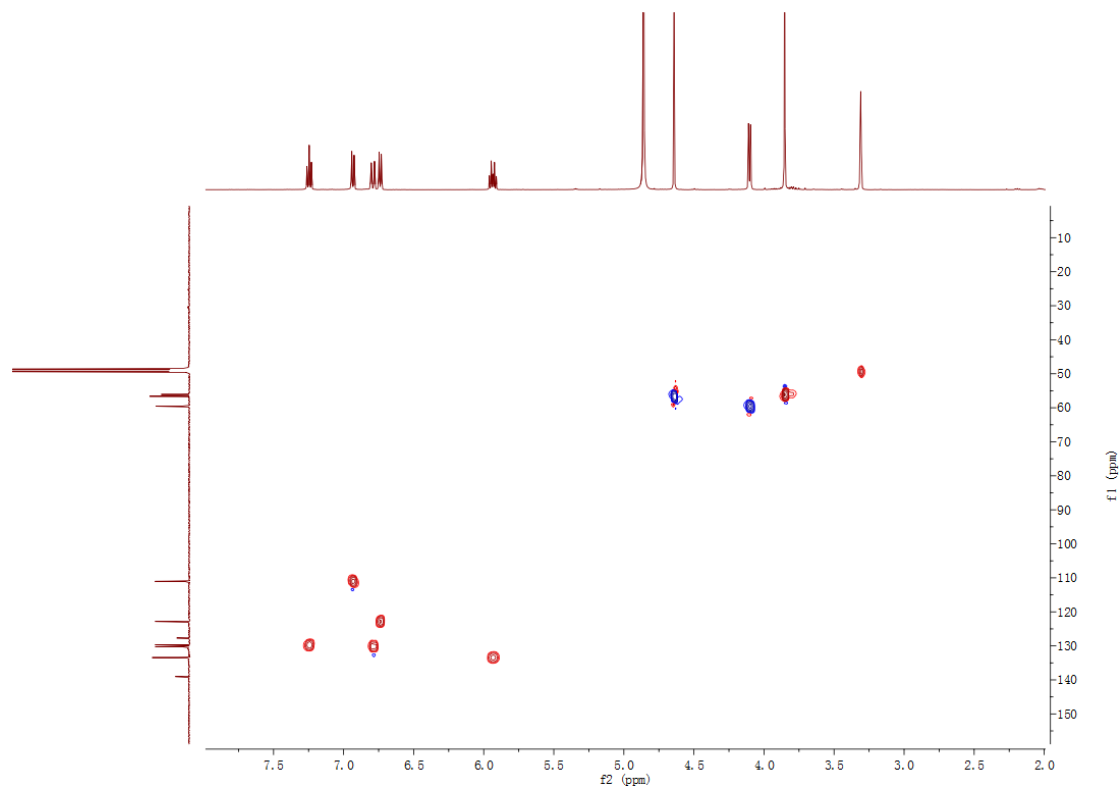

**Figure S59.** HMBC spectrum of **7** in methanol- $d_4$

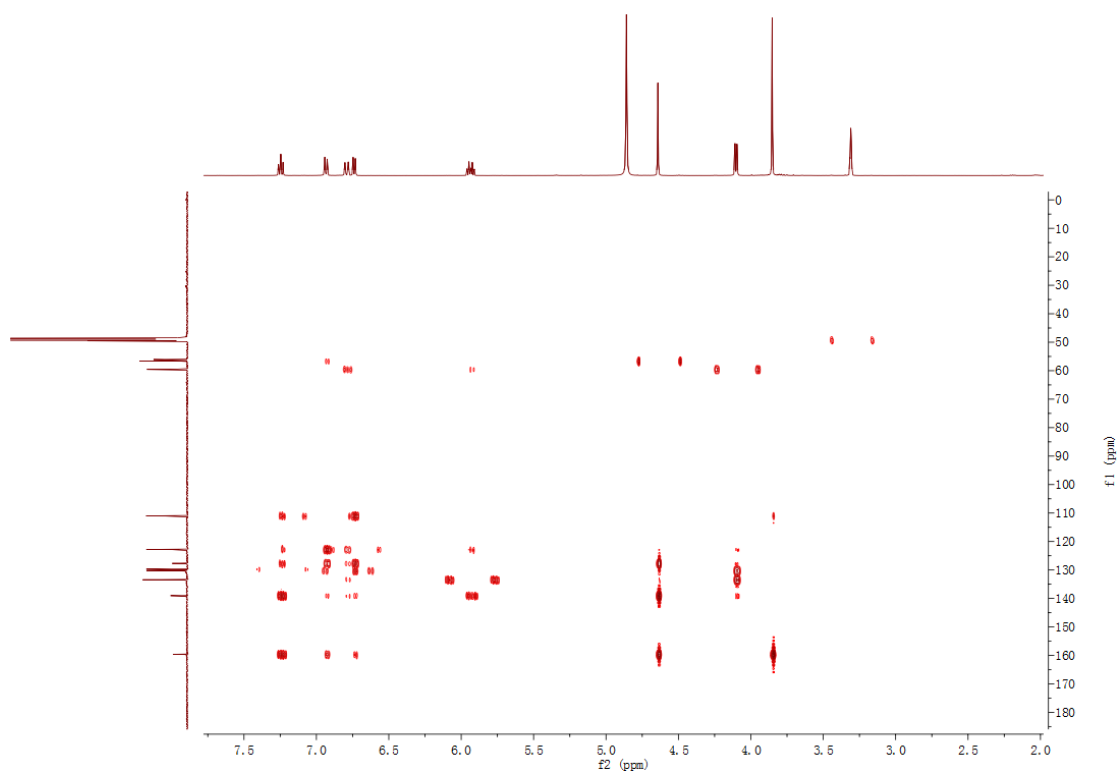

**Figure S60.** NOESY spectrum of **7** in methanol- $d_4$

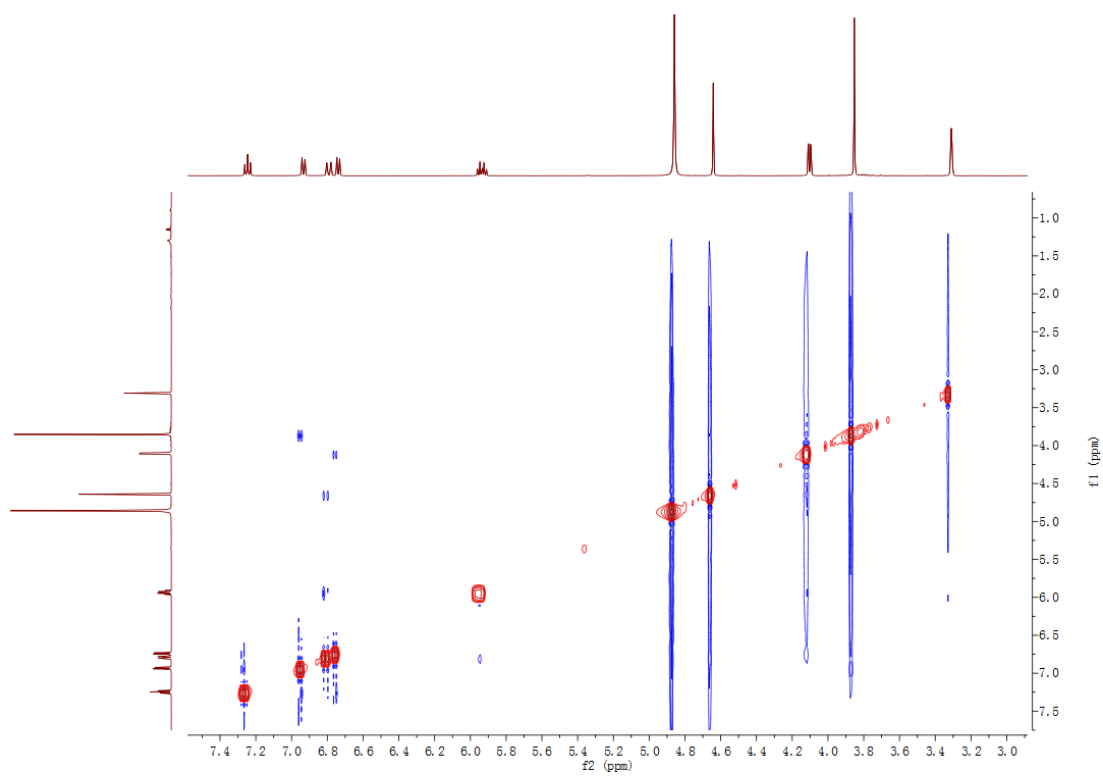

**Figure S61.** IR spectrum of **7**

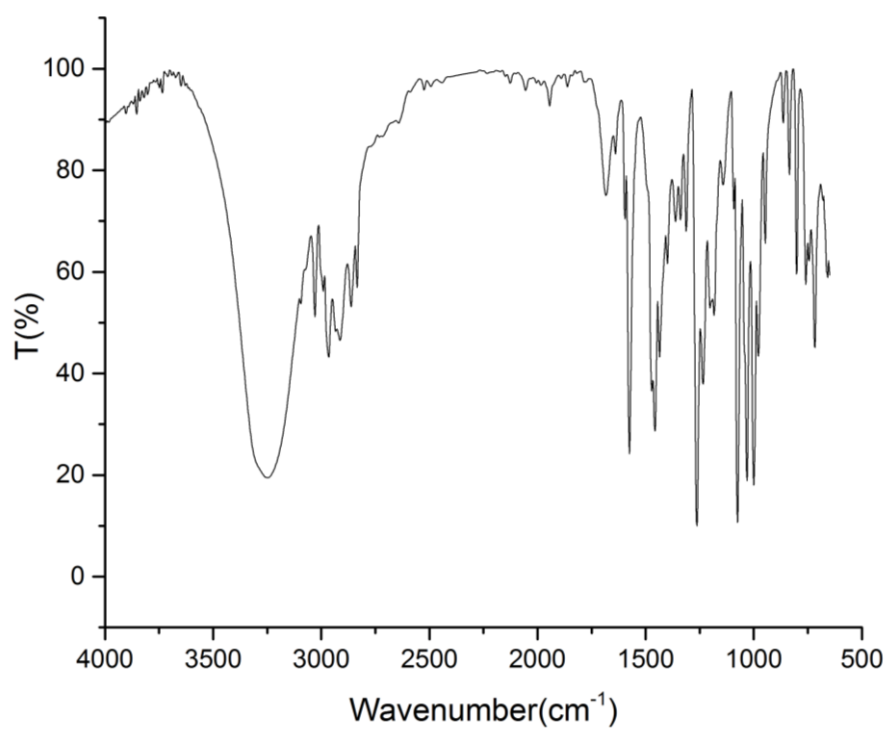

**Figure S62.** UV data of **7** in MeOH

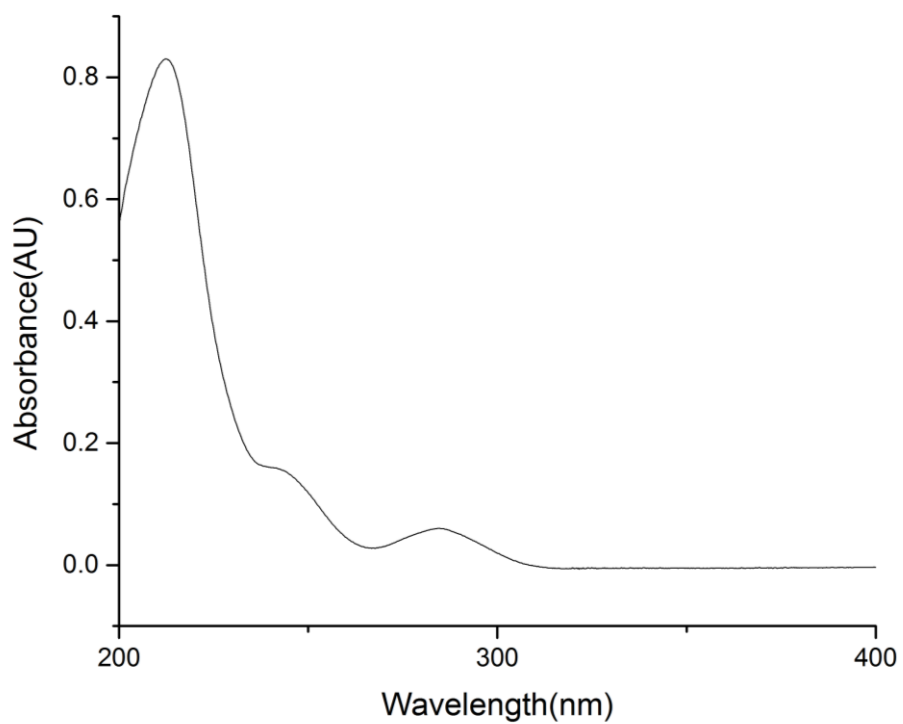

### Preparation of MTPA esters of **1** by the modified Mosher's method

Compound **1** (4.1 mg) was reacted with (–)- $\alpha$ -methoxy- $\alpha$ -(trifluoromethyl)phenylacetyl chloride ((–)-MTPA-Cl, 20  $\mu$ L) in anhydrous pyridine (400  $\mu$ L) for 8 h at room temperature. Then the solvent from reaction mixture was removed under reduced pressure to furnish a residue, which was purified by preparative TLC (with CH<sub>2</sub>Cl<sub>2</sub> eluant) to give (*S*)-MTPA ester (**1a**, 3.8 mg). Through a same procedure, (*R*)-MTPA ester (**1b**, 3.7 mg) was obtained from **1** (4.2 mg) using (+)-MTPA-Cl.

**(*S*)-MTPA ester for 1a:** <sup>1</sup>H NMR (CDCl<sub>3</sub>, 400 MHz)  $\delta_{\text{H}}$  7.04 (1H, d,  $J$  = 7.7 Hz, H-4), 6.60 (1H, d,  $J$  = 7.7 Hz, H-5), 5.81 (1H, dd,  $J$  = 5.1, 8.7 Hz, H-6), 5.63 (1H, d,  $J$  = 12.0 Hz, H-9a), 5.33 (1H, d,  $J$  = 12.0 Hz, H-9b), 4.60 (1H, t,  $J$  = 9.1 Hz, H-2), 3.22 (1H, dd,  $J$  = 8.9, 16.6 Hz, H-3a), 3.11 (1H, dd,  $J$  = 9.4, 16.6 Hz, H-3b), 1.64 (2H, m, H-7), 1.33 (3H, s, H-13), 1.19 (3H, s, H-12), 0.75 (3H, t,  $J$  = 7.3 Hz, H-10); ESIMS  $m/z$  716.05 [M+NH<sub>4</sub><sup>+</sup>]<sup>+</sup>.

**(*R*)-MTPA ester for 1b:** <sup>1</sup>H NMR (CDCl<sub>3</sub>, 400 MHz)  $\delta_{\text{H}}$  7.14 (1H, d,  $J$  = 7.7 Hz, H-4), 6.85 (1H, d,  $J$  = 7.7 Hz, H-5), 6.00 (1H, dd,  $J$  = 4.9, 8.8 Hz, H-6), 5.66 (1H, d,  $J$  = 12.0 Hz, H-9a), 5.48 (1H, d,  $J$  = 12.0 Hz, H-9b), 4.62 (1H, t,  $J$  = 9.1 Hz, H-2), 3.22 (1H, dd,  $J$  = 8.3, 16.3 Hz, H-3a), 3.13 (1H, dd,  $J$  = 9.4, 16.3 Hz, H-3b), 1.55 (2H, m, H-7), 1.35 (3H, s, H-13), 1.19 (3H, s, H-12), 0.72 (3H, t,  $J$  = 7.3 Hz, H-10); ESIMS  $m/z$  716.05 [M+NH<sub>4</sub><sup>+</sup>]<sup>+</sup>.

**Figure S63.** ESIMS spectrum of (*S*)-MTPA ester (**1a**)

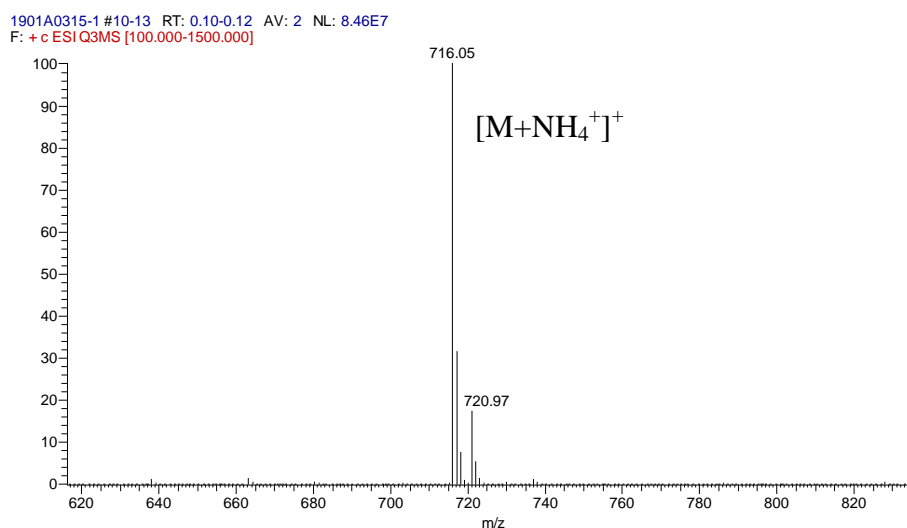

**Figure S64.** ESIMS spectrum of (*R*)-MTPA ester (**1b**)

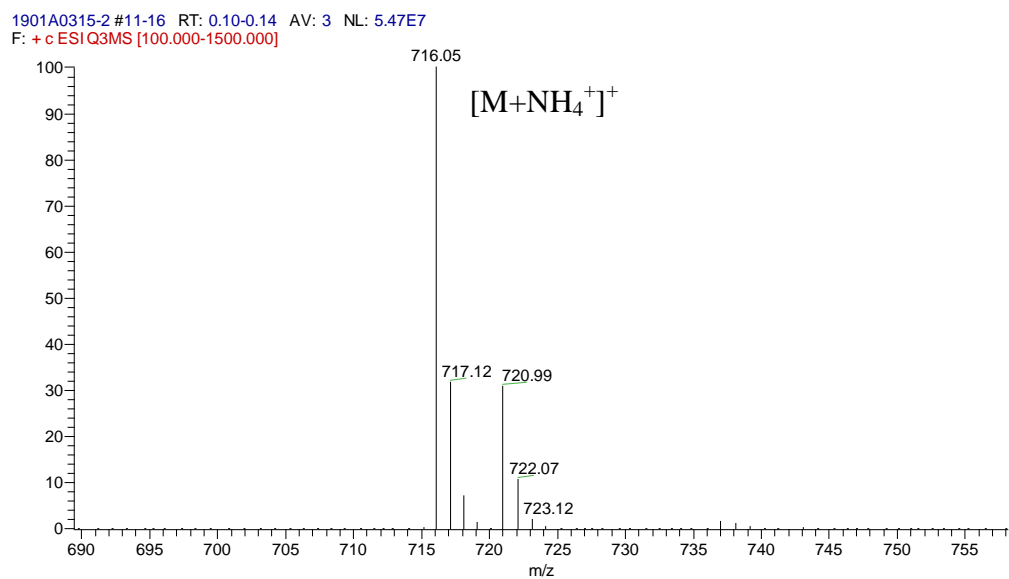

**Figure S65.**  $^1\text{H}$  NMR spectrum of (*S*)-MTPA ester (**1a**) in  $\text{CDCl}_3$

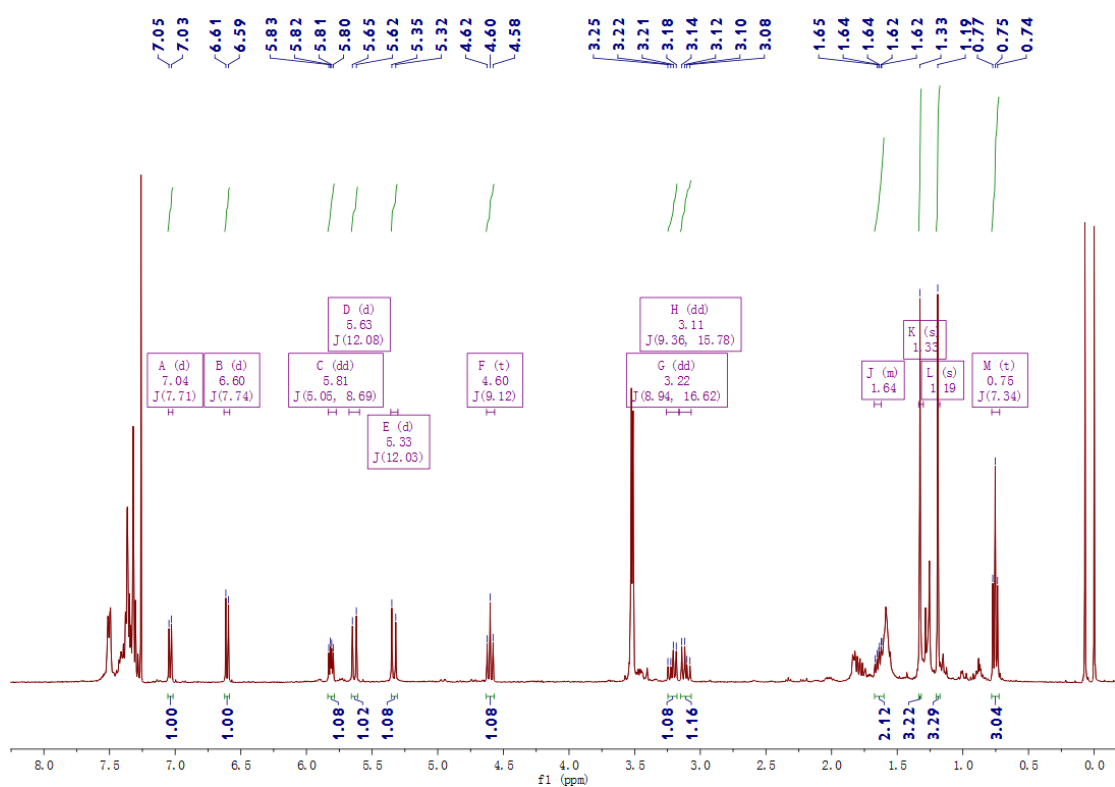

**Figure S66.**  $^1\text{H}$  NMR spectrum of (*R*)-MTPA ester (**1b**) in  $\text{CDCl}_3$

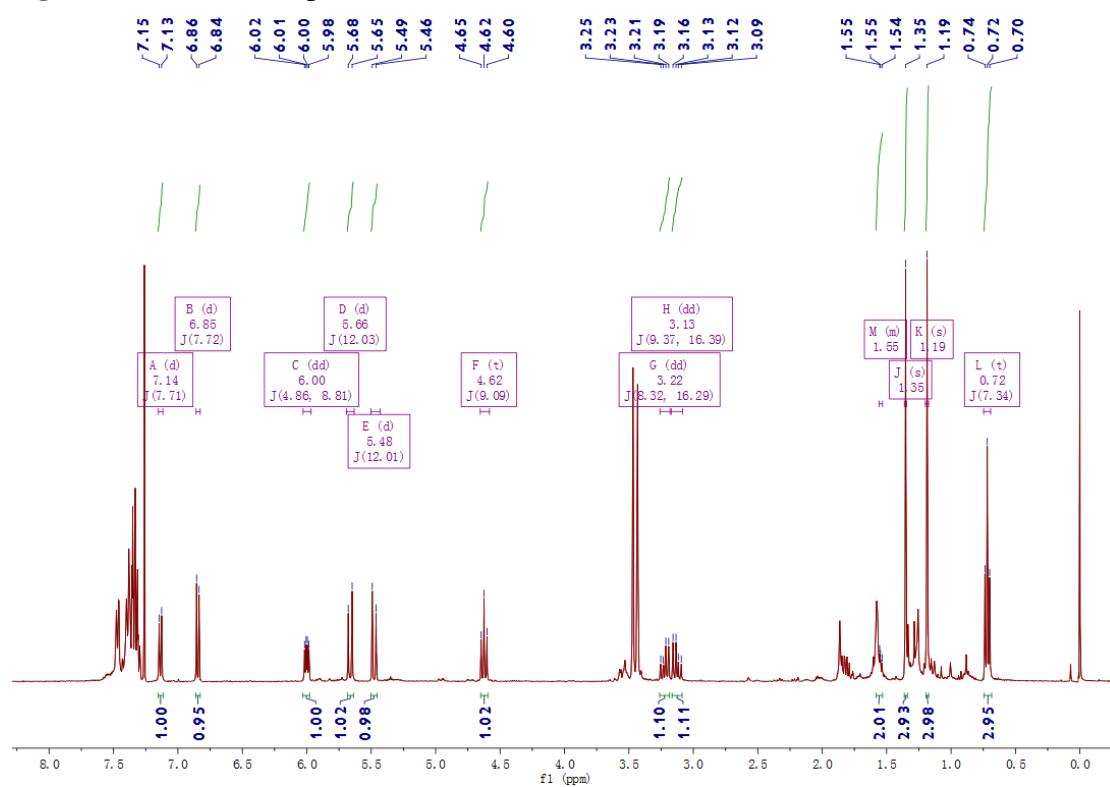

**The  $^1\text{H}$  and  $^{13}\text{C}$  NMR data and HRMS data of compounds 8-14.**

2-(Hydroxymethyl)-3-propylphenol (**8**): colorless oil;  $^1\text{H}$  NMR (400 MHz,  $\text{CDCl}_3$ ):  $\delta_{\text{H}}$  7.11(1H, t,  $J = 7.9$ , H-2), 6.73 (1H, d,  $J = 7.9$ , H-1), 6.71 (1H, d,  $J = 7.9$ , H-3), 4.90 (2H, s, H-10), 2.55 (2H, t,  $J = 7.7$ , H-7), 1.54 (2H, m, H-8), 0.94 (3H, t,  $J = 7.3$ , H-9);  $^{13}\text{C}$  NMR (101 MHz,  $\text{CDCl}_3$ ):  $\delta_{\text{C}}$  156.6 (C-6), 141.1 (C-4), 128.9 (C-2), 123.0 (C-5), 121.8 (C-3), 114.5 (C-1), 60.0 (C-10), 35.4 (C-7), 24.9 (C-8), 14.1 (C-9); HRESIMS  $m/z$  167.1076  $[\text{M}+\text{H}]^+$  (calcd for  $\text{C}_{10}\text{H}_{15}\text{O}_2$ , 167.1072).

Penicphenol (**9**): colorless oil;  $^1\text{H}$  NMR (400 MHz,  $\text{CD}_3\text{OD}$ )  $\delta_{\text{H}}$  7.08 (1H, t,  $J = 7.8$  Hz, H-2), 6.75 (1H, d,  $J = 7.8$  Hz, H-1), 6.74 (1H, d,  $J = 11.6$  Hz, H-7), 6.61 (1H, d,  $J = 7.8$  Hz, H-3), 5.90 (1H, dt,  $J = 11.6$ , 6.7 Hz, H-8), 4.68 (2H, s, H-10), 4.12 (2H, dd,  $J = 6.7$ , 1.4 Hz, H-9);  $^{13}\text{C}$  NMR (101 MHz,  $\text{CD}_3\text{OD}$ )  $\delta_{\text{C}}$  156.3 (C-6), 136.3 (C-4), 131.9 (C-8), 130.0 (C-7), 128.5 (C-2), 123.6 (C-5), 120.9 (C-3), 115.3 (C-1), 59.1 (C-9), 58.6 (C-10); HRESIMS  $m/z$  181.0852  $[\text{M}+\text{H}]^+$  (calcd for  $\text{C}_{10}\text{H}_{13}\text{O}_3$ , 181.0865).

Penicibenzoxepinol (**10**): colorless oil;  $^1\text{H}$  NMR (400 MHz,  $\text{CDCl}_3$ )  $\delta_{\text{H}}$  7.05 (1H, t,  $J = 7.8$  Hz, H-2), 6.82 (1H, d,  $J = 7.8$  Hz, H-1), 6.59 (1H, d,  $J = 7.8$  Hz, H-3), 6.47 (1H, dt,  $J = 12.4$ , 2.1 Hz, H-7), 5.86 (1H, dt,  $J = 12.4$ , 3.0 Hz, H-8), 4.85 (2H, s, H-10), 4.56 (2H, t,  $J = 2.6$  Hz, H-9);  $^{13}\text{C}$  NMR (101 MHz,  $\text{CDCl}_3$ )  $\delta_{\text{C}}$  153.4 (C-6), 138.1 (C-4), 133.2 (C-8), 128.7 (C-7), 127.7 (C-2), 126.3 (C-5), 122.3 (C-3), 113.8 (C-1), 72.8 (C-9), 65.0 (C-10); HRESIMS  $m/z$  163.0749  $[\text{M} + \text{H}]^+$  (calcd for  $\text{C}_{10}\text{H}_{11}\text{O}_2$ , 163.0759).

(-)-Brassicadiol (**11**): colorless oil;  $^1\text{H}$  NMR (400 MHz,  $\text{CDCl}_3$ )  $\delta_{\text{H}}$  6.98 (1H, d,  $J = 7.5$  Hz, H-4), 6.65 (1H, d,  $J = 7.5$  Hz, H-5), 4.70 (1H, d,  $J = 12.0$  Hz, H-9), 4.64 (1H, d,  $J = 12.0$  Hz, H-9), 4.58 (1H, t,  $J = 9.1$  Hz, H-2), 3.09 (2H, m, H-3), 2.60, (2H, m, H-6), 1.56 (2H, m, H-7), 1.32 (3H, s, H-13), 1.16 (3H, s, H-12), 0.95 (3H, t,  $J = 7.3$  Hz, H-10);  $^{13}\text{C}$  NMR (101 MHz,  $\text{CDCl}_3$ )  $\delta_{\text{C}}$  158.8 (C-9b), 141.0 (C-5a), 124.7 (C-3a), 124.2 (C-4), 121.8 (C-5), 120.2 (C-9a), 89.8 (C-2), 71.8 (C-11), 57.1 (C-9), 34.7 (C-6), 30.6 (C-3), 26.4 (C-13), 25.3 (C-7), 24.1 (C-12), 14.2 (C-10); HRESIMS  $m/z$  251.1627  $[\text{M} + \text{H}]^+$  (calcd for  $\text{C}_{15}\text{H}_{23}\text{O}_3$ , 251.1647).

(+)-Pseudodeflectusin (**12**): colorless oil;  $^1\text{H}$  NMR (400 MHz,  $\text{CDCl}_3$ )  $\delta_{\text{H}}$  7.61 (1H, d,  $J = 7.9$  Hz, H-4), 6.88 (1H, d,  $J = 7.9$  Hz, H-5), 6.28 (1H, s, H-9), 4.46 (1H, m,

H-7), 2.79 (1H, dd,  $J = 17.3, 3.6$  Hz, H-6), 2.71 (1H,  $J = 17.3, 10.7$  Hz, H-6), 2.36 (3H, s, H-13), 2.12 (3H, s, H-12), 1.40 (3H, d,  $J = 6.2$  Hz, H-10);  $^{13}\text{C}$  NMR (101 MHz,  $\text{CDCl}_3$ )  $\delta_{\text{C}}$  183.2 (C-3), 162.0 (C-9b), 145.2 (C-2), 143.5 (C-5a), 132.3 (C-11), 123.8 (C-4), 122.7 (C-5), 122.2 (C-3a), 119.5 (C-9a), 87.8 (C-9), 62.7 (C-7), 35.9 (C-6), 21.1 (C-10), 20.3 (C-12), 17.8 (C-13); HRESIMS  $m/z$  261.1136  $[\text{M} + \text{H}]^+$  (calcd for  $\text{C}_{16}\text{H}_{21}\text{O}_4$ , 261.1127).

(-)-Penicisochroman B (**13**): colorless oil;  $^1\text{H}$  NMR (400 MHz,  $\text{CDCl}_3$ )  $\delta_{\text{H}}$  7.50 (1H, d,  $J = 7.9$  Hz, H-4), 6.79 (1H, d,  $J = 7.9$  Hz, H-5), 5.67 (1H, s, H-9), 4.41 (1H, d,  $J = 4.0$  Hz, H-2), 4.25 (1H, m, H-7), 3.61 (3H, s,  $\text{OCH}_3$ -9), 2.74, (1H, dd,  $J = 17.3, 3.8$  Hz, H-6), 2.67 (1H,  $J = 17.3, 10.5$  Hz, H-6), 2.34 (1H, m, H-11), 1.39 (3H, d,  $J = 6.3$  Hz, H-10), 1.18 (3H, d,  $J = 6.9$  Hz, H-13), 0.87 (3H, d,  $J = 6.9$  Hz, H-12);  $^{13}\text{C}$  NMR (101 MHz,  $\text{CDCl}_3$ )  $\delta_{\text{C}}$  202.1 (C-3), 171.0 (C-9b), 145.5 (C-5a), 123.2 (C-4), 122.4 (C-5), 120.2 (C-3a), 120.0 (C-9a), 94.9 (C-9), 90.2 (C-2), 62.7 (C-7), 55.8, ( $\text{OCH}_3$ -9), 35.9 (C-6), 31.4 (C-11), 21.1 (C-10), 19.0 (C-12), 15.8 (C-13); HRESIMS  $m/z$  277.1438  $[\text{M} + \text{H}]^+$  (calcd for  $\text{C}_{16}\text{H}_{21}\text{O}_4$ , 277.1440).

Ustusorane A (**14**): colorless oil;  $^1\text{H}$  NMR (400 MHz,  $\text{CDCl}_3$ )  $\delta_{\text{H}}$  7.55 (1H, d,  $J = 7.8$  Hz, H-4), 6.95 (1H, d,  $J = 7.8$  Hz, H-5), 4.91 (1H, d,  $J = 12.0$  Hz, H-9), 4.72 (1H, dd,  $J = 12.0, 2.2$  Hz, H-9), 4.08 (1H, m, H-7), 2.95 (1H, dd,  $J = 13.7, 9.2$  Hz, H-6), 2.90 (1H, dt,  $J = 13.7, 3.0$  Hz, H-6), 2.35 (3H, s, H-13), 2.11 (3H, s, H-12), 1.37 (3H, d,  $J = 6.4$  Hz, H-10);  $^{13}\text{C}$  NMR (101 MHz,  $\text{CDCl}_3$ )  $\delta_{\text{C}}$  183.6 (C-3), 163.1 (C-9b), 147.8 (C-5a), 145.1 (C-2), 132.3 (C-11), 124.6 (C-5), 124.3 (C-9a), 123.6 (C-4), 121.8 (C-3a), 68.8 (C-7), 54.3 (C-8), 41.6, (C-6), 24.2 (C-10), 20.2 (C-12), 17.5 (C-13); HRESIMS  $m/z$  263.1298  $[\text{M} + \text{H}]^+$  (calcd for  $\text{C}_{15}\text{H}_{19}\text{O}_4$ , 263.1283).

### The rDNA sequencing data of *Aspergillus* sp. ZJ-68

ATACACGGGGGGGAGGTTAGGCCTGCCCCGGGGGCAGACCTGCACTCG  
GTAATGATCCTTCCGTAGGGGAACCTGCGGAAGGATCATTACCGAGTGCAG  
GTCTGCCCCCGGGCAGGCCTAACCTCCCACCCGTGAATACCTGACCAACGT  
TGCTTCGGCGGTGCGCCCCCCCCCGGGGGTAGCCGCCGGAGACCACACCGA  
ACCTCCTGTCTTTAGTGTTGTCTGAGCTTGATAGCAAACCTATTAAAACTTT  
CAACAATGGATCTCTTGGTTCCGGCATCGATGAAGAACGCAGCGAACTGCG  
ATAAGTAATGTGAATTGCAGAATTCAGTGAATCATCGAGTCTTTGAACGCA  
CATTGCGCCCCCTGGCATTCCGGGGGGGCATGCCTGTCCGAGCGTCATTGCT  
GCCCTTCAAGCCCGGCTTGTGTGTTGGGTCGTCGTCCCCCCCCGGGGGACG  
GGCCCGAAAGGCAGCGGCGGCACCGCGTCCGGTCCTCGAGCGTATGGGGC  
TTTGTCACCCGCTCGATTAGGGCCGGCCGGGCGCCAGCCGGCGTCTCCAAC  
CTTCTATTTTACCAGGTGACCTCGGATCAGGTAGGGATACCCGCTGAACCT  
AAGCATATCAATAAGGCGGGAGGAATCATCGTTACCCATA

**Figure S67.** Simple picture and microscopic picture of *Aspergillus* sp. ZJ-68

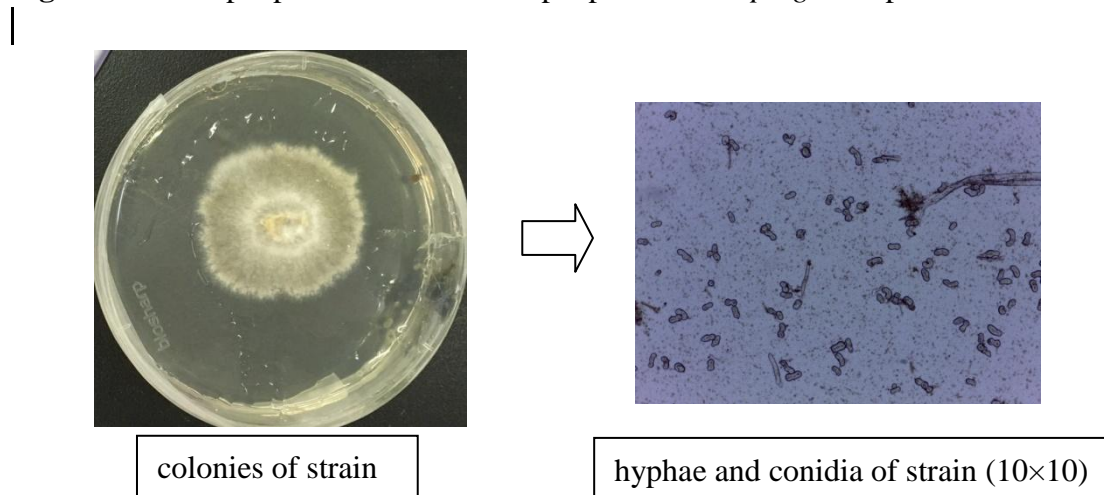

**Figure S68.** The chiral HPLC separation of ( $\pm$ )-penicisochroman A

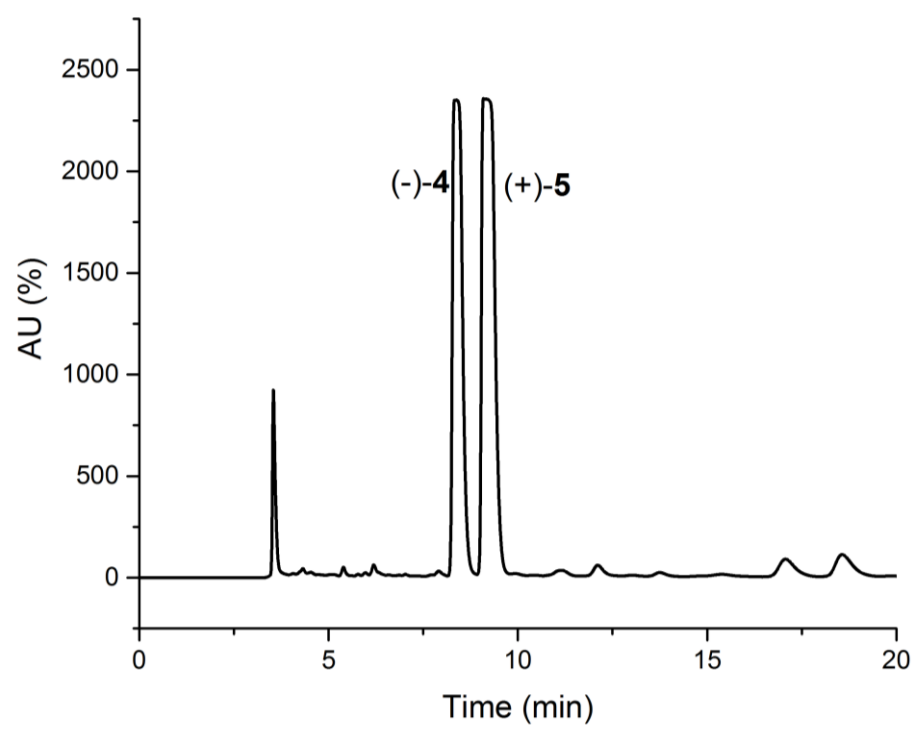

## ECD calculation details (Methods and Results)

### 1. Methods

Conformational searches were carried out by means of the Spartan'14 software using Molecular Merck force field (MMFF). All density functional theory (DFT) and time-dependent (TD)-DFT calculations were performed with Gaussian 09 program. Conformers within a 10 kcal/mol energy window were generated and optimized by DFT calculations at the B3LYP/6-31+G (d, p) level. Conformers with a Boltzmann distribution over 3% were chose for ECD calculations by TD-DFT method at the B3LYP/6-311+G (d, p) level. The polarizable continuum model for MeOH was used. The calculated ECD curves were generated using the SpecDis 3.0 (University of Würzburg) and Origin Pro 8.5 (Origin Lab, Ltd.) from dipole-length rotational strengths by applying Gaussian band shapes with sigma = 0.30 eV.

### 2. Results

#### 2.1. Gibbs free energies and Boltzmann-population of low-energy conformers of 2*R*,6*R*-1.

| Conformers of 2 <i>R</i> ,6 <i>R</i> -1 | In MeOH      |                    |
|-----------------------------------------|--------------|--------------------|
|                                         | $\Delta G^a$ | P (%) <sup>b</sup> |
| <b>1a</b>                               | 0.00         | 42.6               |
| <b>1b</b>                               | 0.16         | 32.5               |
| <b>1c</b>                               | 0.83         | 10.4               |
| <b>1d</b>                               | 1.01         | 7.7                |
| <b>1e</b>                               | 1.08         | 6.8                |

<sup>a</sup> $\Delta G$ , B3LYP/ 6-31+G (d, p), in kcal/mol. <sup>b</sup>Boltzmann-population.

#### 2.2. Gibbs free energies and Boltzmann-population of low-energy conformers of 2*S*-3.

| Conformers of 2 <i>S</i> -3 | In MeOH      |                    |
|-----------------------------|--------------|--------------------|
|                             | $\Delta G^a$ | P (%) <sup>b</sup> |
| <b>3a</b>                   | 0.00         | 66.7               |
| <b>3b</b>                   | 0.92         | 14.1               |
| <b>3c</b>                   | 1.22         | 8.5                |
| <b>3d</b>                   | 1.23         | 8.4                |

<sup>a</sup> $\Delta G$ , B3LYP/ 6-31+G (d, p), in kcal/mol. <sup>b</sup>Boltzmann-population.

2.3. Gibbs free energies and Boltzmann-population of low-energy conformers of 7R-4.

| Conformers of 7R-4 | In MeOH      |                    |
|--------------------|--------------|--------------------|
|                    | $\Delta G^a$ | P (%) <sup>b</sup> |
| <b>4a</b>          | 0.00         | 96.0               |
| <b>4b</b>          | 2.25         | 2.1                |
| <b>4c</b>          | 2.34         | 1.8                |

<sup>a</sup> $\Delta G$ , B3LYP/ 6-31+G (d, p), in kcal/mol. <sup>b</sup>Boltzmann-population.

2.4 Cartesian coordinates for the low-energy optimized conformers of 2R,6R-1 at B3LYP/6-31+G (d, p) level of theory in MeOH.

| Conformer <b>1a</b> |      | Standard Orientation<br>(Ångstroms) |           |           |           |
|---------------------|------|-------------------------------------|-----------|-----------|-----------|
| Center Number       | Atom | Type                                | X         | Y         | Z         |
| 1                   | 6    | 0                                   | -0.990000 | -1.120000 | 0.109000  |
| 2                   | 6    | 0                                   | -2.264000 | -0.632000 | 0.302000  |
| 3                   | 6    | 0                                   | -2.481000 | 0.729000  | 0.079000  |
| 4                   | 6    | 0                                   | -1.434000 | 1.606000  | -0.322000 |
| 5                   | 6    | 0                                   | -0.127000 | 1.083000  | -0.503000 |
| 6                   | 6    | 0                                   | 0.043000  | -0.283000 | -0.283000 |
| 7                   | 8    | 0                                   | 1.243000  | -0.947000 | -0.398000 |
| 8                   | 6    | 0                                   | 0.871000  | -2.358000 | -0.418000 |
| 9                   | 6    | 0                                   | -0.470000 | -2.490000 | 0.322000  |
| 10                  | 6    | 0                                   | 2.021000  | -3.194000 | 0.191000  |
| 11                  | 6    | 0                                   | 1.682000  | -4.686000 | 0.207000  |
| 12                  | 6    | 0                                   | 3.331000  | -2.969000 | -0.572000 |
| 13                  | 6    | 0                                   | -1.804000 | 3.070000  | -0.506000 |
| 14                  | 6    | 0                                   | 1.054000  | 1.904000  | -0.950000 |
| 15                  | 8    | 0                                   | 2.245000  | -2.791000 | 1.549000  |
| 16                  | 8    | 0                                   | 0.949000  | 2.235000  | -2.328000 |
| 17                  | 6    | 0                                   | -1.393000 | 3.977000  | 0.662000  |
| 18                  | 6    | 0                                   | -2.107000 | 3.654000  | 1.966000  |
| 19                  | 8    | 0                                   | -1.229000 | 3.560000  | -1.719000 |
| 20                  | 1    | 0                                   | -3.074000 | -1.279000 | 0.622000  |
| 21                  | 1    | 0                                   | -3.487000 | 1.117000  | 0.228000  |
| 22                  | 1    | 0                                   | 0.739000  | -2.633000 | -1.475000 |
| 23                  | 1    | 0                                   | -1.100000 | -3.266000 | -0.122000 |
| 24                  | 1    | 0                                   | -0.349000 | -2.675000 | 1.394000  |
| 25                  | 1    | 0                                   | 0.811000  | -4.892000 | 0.838000  |
| 26                  | 1    | 0                                   | 2.508000  | -5.268000 | 0.633000  |

|    |   |   |           |           |           |
|----|---|---|-----------|-----------|-----------|
| 27 | 1 | 0 | 1.479000  | -5.063000 | -0.801000 |
| 28 | 1 | 0 | 3.649000  | -1.921000 | -0.521000 |
| 29 | 1 | 0 | 3.236000  | -3.252000 | -1.626000 |
| 30 | 1 | 0 | 4.145000  | -3.554000 | -0.129000 |
| 31 | 1 | 0 | -2.889000 | 3.147000  | -0.647000 |
| 32 | 1 | 0 | 1.999000  | 1.370000  | -0.809000 |
| 33 | 1 | 0 | 1.140000  | 2.825000  | -0.368000 |
| 34 | 1 | 0 | 2.342000  | -1.819000 | 1.532000  |
| 35 | 1 | 0 | 0.069000  | 2.661000  | -2.416000 |
| 36 | 1 | 0 | -1.609000 | 5.019000  | 0.393000  |
| 37 | 1 | 0 | -0.311000 | 3.941000  | 0.828000  |
| 38 | 1 | 0 | -1.842000 | 4.390000  | 2.732000  |
| 39 | 1 | 0 | -1.825000 | 2.667000  | 2.345000  |
| 40 | 1 | 0 | -3.194000 | 3.679000  | 1.836000  |
| 41 | 1 | 0 | -1.578000 | 4.459000  | -1.853000 |

| Conformer <b>1b</b> |      | Standard Orientation<br>(Ångstroms) |           |           |           |
|---------------------|------|-------------------------------------|-----------|-----------|-----------|
| Center<br>Number    | Atom | Type                                | X         | Y         | Z         |
| 1                   | 6    | 0                                   | -0.669000 | -1.079000 | 0.567000  |
| 2                   | 6    | 0                                   | -1.722000 | -1.419000 | -0.254000 |
| 3                   | 6    | 0                                   | -1.946000 | -0.642000 | -1.394000 |
| 4                   | 6    | 0                                   | -1.126000 | 0.468000  | -1.719000 |
| 5                   | 6    | 0                                   | -0.082000 | 0.833000  | -0.826000 |
| 6                   | 6    | 0                                   | 0.126000  | 0.019000  | 0.284000  |
| 7                   | 8    | 0                                   | 1.104000  | 0.224000  | 1.229000  |
| 8                   | 6    | 0                                   | 1.124000  | -1.013000 | 2.004000  |
| 9                   | 6    | 0                                   | -0.254000 | -1.680000 | 1.854000  |
| 10                  | 6    | 0                                   | 1.520000  | -0.690000 | 3.465000  |
| 11                  | 6    | 0                                   | 1.565000  | -1.955000 | 4.325000  |
| 12                  | 6    | 0                                   | 2.874000  | 0.025000  | 3.524000  |
| 13                  | 6    | 0                                   | -1.402000 | 1.296000  | -2.968000 |
| 14                  | 6    | 0                                   | 0.789000  | 2.042000  | -1.035000 |
| 15                  | 8    | 0                                   | 0.550000  | 0.190000  | 4.048000  |
| 16                  | 8    | 0                                   | -0.030000 | 3.205000  | -1.140000 |
| 17                  | 6    | 0                                   | -2.093000 | 0.607000  | -4.155000 |
| 18                  | 6    | 0                                   | -1.256000 | -0.498000 | -4.782000 |
| 19                  | 8    | 0                                   | -2.212000 | 2.408000  | -2.584000 |
| 20                  | 1    | 0                                   | -2.374000 | -2.254000 | -0.019000 |
| 21                  | 1    | 0                                   | -2.791000 | -0.907000 | -2.025000 |
| 22                  | 1    | 0                                   | 1.895000  | -1.653000 | 1.550000  |

|    |   |   |           |           |           |
|----|---|---|-----------|-----------|-----------|
| 23 | 1 | 0 | -0.171000 | -2.770000 | 1.815000  |
| 24 | 1 | 0 | -0.956000 | -1.388000 | 2.641000  |
| 25 | 1 | 0 | 0.579000  | -2.429000 | 4.391000  |
| 26 | 1 | 0 | 1.852000  | -1.714000 | 5.355000  |
| 27 | 1 | 0 | 2.277000  | -2.685000 | 3.929000  |
| 28 | 1 | 0 | 2.843000  | 0.985000  | 2.997000  |
| 29 | 1 | 0 | 3.671000  | -0.587000 | 3.088000  |
| 30 | 1 | 0 | 3.145000  | 0.258000  | 4.561000  |
| 31 | 1 | 0 | -0.458000 | 1.698000  | -3.354000 |
| 32 | 1 | 0 | 1.382000  | 1.931000  | -1.948000 |
| 33 | 1 | 0 | 1.480000  | 2.199000  | -0.201000 |
| 34 | 1 | 0 | 0.417000  | 0.920000  | 3.412000  |
| 35 | 1 | 0 | 0.577000  | 3.965000  | -1.129000 |
| 36 | 1 | 0 | -2.298000 | 1.365000  | -4.923000 |
| 37 | 1 | 0 | -3.081000 | 0.224000  | -3.873000 |
| 38 | 1 | 0 | -1.769000 | -0.904000 | -5.659000 |
| 39 | 1 | 0 | -1.082000 | -1.322000 | -4.086000 |
| 40 | 1 | 0 | -0.284000 | -0.114000 | -5.109000 |
| 41 | 1 | 0 | -1.716000 | 2.843000  | -1.857000 |

| Conformer <b>1c</b> |      | Standard Orientation<br>(Ångstroms) |           |           |           |
|---------------------|------|-------------------------------------|-----------|-----------|-----------|
| Center<br>Number    | Atom | Type                                | X         | Y         | Z         |
| 1                   | 6    | 0                                   | -0.806000 | -0.731000 | 0.776000  |
| 2                   | 6    | 0                                   | -1.934000 | 0.039000  | 0.964000  |
| 3                   | 6    | 0                                   | -2.015000 | 1.264000  | 0.297000  |
| 4                   | 6    | 0                                   | -0.980000 | 1.724000  | -0.556000 |
| 5                   | 6    | 0                                   | 0.198000  | 0.938000  | -0.689000 |
| 6                   | 6    | 0                                   | 0.230000  | -0.288000 | -0.030000 |
| 7                   | 8    | 0                                   | 1.284000  | -1.169000 | -0.078000 |
| 8                   | 6    | 0                                   | 0.763000  | -2.390000 | 0.531000  |
| 9                   | 6    | 0                                   | -0.445000 | -2.022000 | 1.403000  |
| 10                  | 6    | 0                                   | 1.914000  | -3.122000 | 1.262000  |
| 11                  | 6    | 0                                   | 2.627000  | -2.250000 | 2.300000  |
| 12                  | 6    | 0                                   | 1.430000  | -4.424000 | 1.903000  |
| 13                  | 6    | 0                                   | -1.099000 | 3.068000  | -1.264000 |
| 14                  | 6    | 0                                   | 1.386000  | 1.376000  | -1.502000 |
| 15                  | 8    | 0                                   | 2.900000  | -3.486000 | 0.279000  |
| 16                  | 8    | 0                                   | 1.837000  | 2.647000  | -1.039000 |
| 17                  | 6    | 0                                   | -2.506000 | 3.599000  | -1.577000 |
| 18                  | 6    | 0                                   | -3.269000 | 2.737000  | -2.573000 |
| 19                  | 8    | 0                                   | -0.439000 | 4.045000  | -0.458000 |

|    |   |   |           |           |           |
|----|---|---|-----------|-----------|-----------|
| 20 | 1 | 0 | -2.735000 | -0.284000 | 1.621000  |
| 21 | 1 | 0 | -2.900000 | 1.872000  | 0.466000  |
| 22 | 1 | 0 | 0.430000  | -3.013000 | -0.313000 |
| 23 | 1 | 0 | -1.236000 | -2.773000 | 1.328000  |
| 24 | 1 | 0 | -0.186000 | -1.863000 | 2.453000  |
| 25 | 1 | 0 | 3.034000  | -1.340000 | 1.845000  |
| 26 | 1 | 0 | 3.485000  | -2.783000 | 2.727000  |
| 27 | 1 | 0 | 1.966000  | -1.961000 | 3.123000  |
| 28 | 1 | 0 | 0.957000  | -5.072000 | 1.156000  |
| 29 | 1 | 0 | 0.714000  | -4.244000 | 2.710000  |
| 30 | 1 | 0 | 2.273000  | -4.993000 | 2.313000  |
| 31 | 1 | 0 | -0.568000 | 3.022000  | -2.222000 |
| 32 | 1 | 0 | 1.117000  | 1.450000  | -2.561000 |
| 33 | 1 | 0 | 2.223000  | 0.677000  | -1.415000 |
| 34 | 1 | 0 | 3.112000  | -2.670000 | -0.212000 |
| 35 | 1 | 0 | 2.682000  | 2.816000  | -1.492000 |
| 36 | 1 | 0 | -2.409000 | 4.609000  | -1.997000 |
| 37 | 1 | 0 | -3.094000 | 3.734000  | -0.662000 |
| 38 | 1 | 0 | -4.233000 | 3.199000  | -2.806000 |
| 39 | 1 | 0 | -3.465000 | 1.736000  | -2.179000 |
| 40 | 1 | 0 | -2.710000 | 2.635000  | -3.508000 |
| 41 | 1 | 0 | 0.467000  | 3.691000  | -0.324000 |

| Conformer <b>1d</b> |      | Standard Orientation<br>(Ångstroms) |           |           |           |
|---------------------|------|-------------------------------------|-----------|-----------|-----------|
| Center<br>Number    | Atom | Type                                | X         | Y         | Z         |
| 1                   | 6    | 0                                   | -0.920000 | -0.779000 | 1.113000  |
| 2                   | 6    | 0                                   | -2.208000 | -0.292000 | 1.082000  |
| 3                   | 6    | 0                                   | -2.554000 | 0.573000  | 0.042000  |
| 4                   | 6    | 0                                   | -1.621000 | 0.960000  | -0.959000 |
| 5                   | 6    | 0                                   | -0.295000 | 0.462000  | -0.896000 |
| 6                   | 6    | 0                                   | 0.006000  | -0.410000 | 0.149000  |
| 7                   | 8    | 0                                   | 1.241000  | -0.977000 | 0.359000  |
| 8                   | 6    | 0                                   | 0.987000  | -2.042000 | 1.325000  |
| 9                   | 6    | 0                                   | -0.274000 | -1.655000 | 2.116000  |
| 10                  | 6    | 0                                   | 2.248000  | -2.249000 | 2.197000  |
| 11                  | 6    | 0                                   | 2.037000  | -3.354000 | 3.234000  |
| 12                  | 6    | 0                                   | 3.469000  | -2.579000 | 1.330000  |
| 13                  | 6    | 0                                   | -2.120000 | 1.945000  | -2.013000 |
| 14                  | 6    | 0                                   | 0.764000  | 0.789000  | -1.908000 |
| 15                  | 8    | 0                                   | 2.548000  | -1.042000 | 2.911000  |
| 16                  | 8    | 0                                   | 0.458000  | 0.093000  | -3.114000 |

|    |   |   |           |           |           |
|----|---|---|-----------|-----------|-----------|
| 17 | 6 | 0 | -1.778000 | 3.393000  | -1.633000 |
| 18 | 6 | 0 | -2.402000 | 4.405000  | -2.585000 |
| 19 | 8 | 0 | -1.656000 | 1.671000  | -3.330000 |
| 20 | 1 | 0 | -2.934000 | -0.563000 | 1.842000  |
| 21 | 1 | 0 | -3.571000 | 0.963000  | 0.014000  |
| 22 | 1 | 0 | 0.792000  | -2.954000 | 0.742000  |
| 23 | 1 | 0 | -0.872000 | -2.534000 | 2.373000  |
| 24 | 1 | 0 | -0.050000 | -1.078000 | 3.019000  |
| 25 | 1 | 0 | 1.240000  | -3.093000 | 3.939000  |
| 26 | 1 | 0 | 2.939000  | -3.496000 | 3.840000  |
| 27 | 1 | 0 | 1.785000  | -4.308000 | 2.760000  |
| 28 | 1 | 0 | 3.702000  | -1.761000 | 0.640000  |
| 29 | 1 | 0 | 3.312000  | -3.493000 | 0.748000  |
| 30 | 1 | 0 | 4.362000  | -2.714000 | 1.952000  |
| 31 | 1 | 0 | -3.212000 | 1.851000  | -2.075000 |
| 32 | 1 | 0 | 1.762000  | 0.485000  | -1.577000 |
| 33 | 1 | 0 | 0.803000  | 1.863000  | -2.108000 |
| 34 | 1 | 0 | 2.549000  | -0.323000 | 2.249000  |
| 35 | 1 | 0 | 1.185000  | 0.290000  | -3.730000 |
| 36 | 1 | 0 | -0.693000 | 3.544000  | -1.643000 |
| 37 | 1 | 0 | -2.123000 | 3.607000  | -0.614000 |
| 38 | 1 | 0 | -2.163000 | 5.423000  | -2.261000 |
| 39 | 1 | 0 | -3.492000 | 4.304000  | -2.605000 |
| 40 | 1 | 0 | -2.025000 | 4.280000  | -3.604000 |
| 41 | 1 | 0 | -1.226000 | 0.791000  | -3.324000 |

| Conformer <b>1e</b> |      | Standard Orientation<br>(Ångstroms) |           |           |           |
|---------------------|------|-------------------------------------|-----------|-----------|-----------|
| Center<br>Number    | Atom | Type                                | X         | Y         | Z         |
| 1                   | 6    | 0                                   | -1.182000 | -0.608000 | 0.918000  |
| 2                   | 6    | 0                                   | -2.426000 | -0.064000 | 0.701000  |
| 3                   | 6    | 0                                   | -2.606000 | 0.712000  | -0.446000 |
| 4                   | 6    | 0                                   | -1.551000 | 0.961000  | -1.370000 |
| 5                   | 6    | 0                                   | -0.279000 | 0.376000  | -1.135000 |
| 6                   | 6    | 0                                   | -0.144000 | -0.389000 | 0.025000  |
| 7                   | 8    | 0                                   | 1.030000  | -0.987000 | 0.429000  |
| 8                   | 6    | 0                                   | 0.615000  | -1.929000 | 1.465000  |
| 9                   | 6    | 0                                   | -0.696000 | -1.402000 | 2.069000  |
| 10                  | 6    | 0                                   | 1.765000  | -2.099000 | 2.486000  |
| 11                  | 6    | 0                                   | 1.385000  | -3.076000 | 3.601000  |
| 12                  | 6    | 0                                   | 3.049000  | -2.575000 | 1.797000  |
| 13                  | 6    | 0                                   | -1.900000 | 1.856000  | -2.555000 |

|    |   |   |           |           |           |
|----|---|---|-----------|-----------|-----------|
| 14 | 6 | 0 | 0.929000  | 0.553000  | -2.013000 |
| 15 | 8 | 0 | 2.057000  | -0.837000 | 3.102000  |
| 16 | 8 | 0 | 0.604000  | 0.321000  | -3.380000 |
| 17 | 6 | 0 | -1.085000 | 3.149000  | -2.695000 |
| 18 | 6 | 0 | -1.160000 | 4.049000  | -1.471000 |
| 19 | 8 | 0 | -1.835000 | 1.122000  | -3.775000 |
| 20 | 1 | 0 | -3.243000 | -0.221000 | 1.397000  |
| 21 | 1 | 0 | -3.592000 | 1.142000  | -0.621000 |
| 22 | 1 | 0 | 0.431000  | -2.889000 | 0.960000  |
| 23 | 1 | 0 | -1.368000 | -2.219000 | 2.346000  |
| 24 | 1 | 0 | -0.535000 | -0.744000 | 2.929000  |
| 25 | 1 | 0 | 0.534000  | -2.705000 | 4.184000  |
| 26 | 1 | 0 | 2.210000  | -3.194000 | 4.313000  |
| 27 | 1 | 0 | 1.130000  | -4.062000 | 3.201000  |
| 28 | 1 | 0 | 3.399000  | -1.847000 | 1.057000  |
| 29 | 1 | 0 | 2.902000  | -3.537000 | 1.295000  |
| 30 | 1 | 0 | 3.863000  | -2.684000 | 2.523000  |
| 31 | 1 | 0 | -2.950000 | 2.161000  | -2.469000 |
| 32 | 1 | 0 | 1.722000  | -0.156000 | -1.755000 |
| 33 | 1 | 0 | 1.337000  | 1.562000  | -1.897000 |
| 34 | 1 | 0 | 2.165000  | -0.193000 | 2.377000  |
| 35 | 1 | 0 | 1.449000  | 0.328000  | -3.863000 |
| 36 | 1 | 0 | -1.465000 | 3.703000  | -3.563000 |
| 37 | 1 | 0 | -0.039000 | 2.942000  | -2.937000 |
| 38 | 1 | 0 | -0.635000 | 4.989000  | -1.663000 |
| 39 | 1 | 0 | -0.694000 | 3.580000  | -0.599000 |
| 40 | 1 | 0 | -2.199000 | 4.287000  | -1.222000 |
| 41 | 1 | 0 | -0.990000 | 0.623000  | -3.748000 |

2.5 Cartesian coordinates for the low-energy optimized conformers of 2S-3 at B3LYP/6-31+G (d, p) level of theory in MeOH.

| Conformer <b>3a</b> |      | Standard Orientation<br>(Ångstroms) |           |           |           |
|---------------------|------|-------------------------------------|-----------|-----------|-----------|
| Center<br>Number    | Atom | Type                                | X         | Y         | Z         |
| 1                   | 6    | 0                                   | -0.319000 | -0.918000 | -1.375000 |
| 2                   | 6    | 0                                   | -0.224000 | -2.294000 | -1.329000 |
| 3                   | 6    | 0                                   | -0.255000 | -2.889000 | -0.066000 |
| 4                   | 6    | 0                                   | -0.380000 | -2.098000 | 1.095000  |
| 5                   | 6    | 0                                   | -0.475000 | -0.701000 | 1.007000  |
| 6                   | 6    | 0                                   | -0.435000 | -0.125000 | -0.251000 |
| 7                   | 8    | 0                                   | -0.474000 | 1.225000  | -0.488000 |

|    |   |   |           |           |           |
|----|---|---|-----------|-----------|-----------|
| 8  | 6 | 0 | -0.482000 | 1.379000  | -1.935000 |
| 9  | 6 | 0 | -0.289000 | -0.013000 | -2.493000 |
| 10 | 6 | 0 | 0.607000  | 2.359000  | -2.420000 |
| 11 | 6 | 0 | 0.379000  | 3.741000  | -1.794000 |
| 12 | 6 | 0 | 2.030000  | 1.893000  | -2.088000 |
| 13 | 8 | 0 | -0.113000 | -0.334000 | -3.654000 |
| 14 | 6 | 0 | -0.409000 | -2.697000 | 2.424000  |
| 15 | 6 | 0 | -0.720000 | -1.947000 | 3.494000  |
| 16 | 8 | 0 | -0.996000 | -0.596000 | 3.431000  |
| 17 | 6 | 0 | -0.533000 | 0.110000  | 2.268000  |
| 18 | 6 | 0 | -0.831000 | -2.519000 | 4.874000  |
| 19 | 8 | 0 | 0.513000  | 2.539000  | -3.840000 |
| 20 | 1 | 0 | -0.125000 | -2.883000 | -2.234000 |
| 21 | 1 | 0 | -0.182000 | -3.972000 | 0.013000  |
| 22 | 1 | 0 | -1.481000 | 1.721000  | -2.235000 |
| 23 | 1 | 0 | -0.620000 | 4.118000  | -2.042000 |
| 24 | 1 | 0 | 1.091000  | 4.472000  | -2.192000 |
| 25 | 1 | 0 | 0.480000  | 3.720000  | -0.704000 |
| 26 | 1 | 0 | 2.270000  | 0.951000  | -2.593000 |
| 27 | 1 | 0 | 2.175000  | 1.759000  | -1.011000 |
| 28 | 1 | 0 | 2.768000  | 2.621000  | -2.445000 |
| 29 | 1 | 0 | -0.215000 | -3.760000 | 2.517000  |
| 30 | 1 | 0 | -1.208000 | 0.962000  | 2.135000  |
| 31 | 1 | 0 | 0.467000  | 0.502000  | 2.491000  |
| 32 | 1 | 0 | -1.840000 | -2.361000 | 5.268000  |
| 33 | 1 | 0 | -0.627000 | -3.594000 | 4.893000  |
| 34 | 1 | 0 | -0.118000 | -2.028000 | 5.543000  |
| 35 | 1 | 0 | 0.573000  | 1.657000  | -4.264000 |

| Conformer <b>3b</b> |      | Standard Orientation<br>(Ångstroms) |           |           |           |
|---------------------|------|-------------------------------------|-----------|-----------|-----------|
| Center<br>Number    | Atom | Type                                | X         | Y         | Z         |
| 1                   | 6    | 0                                   | -0.357000 | -0.858000 | -1.284000 |
| 2                   | 6    | 0                                   | -0.262000 | -2.235000 | -1.233000 |
| 3                   | 6    | 0                                   | -0.282000 | -2.827000 | 0.031000  |
| 4                   | 6    | 0                                   | -0.399000 | -2.033000 | 1.190000  |
| 5                   | 6    | 0                                   | -0.498000 | -0.636000 | 1.099000  |
| 6                   | 6    | 0                                   | -0.467000 | -0.064000 | -0.161000 |
| 7                   | 8    | 0                                   | -0.514000 | 1.285000  | -0.402000 |
| 8                   | 6    | 0                                   | -0.501000 | 1.439000  | -1.861000 |
| 9                   | 6    | 0                                   | -0.345000 | 0.037000  | -2.410000 |
| 10                  | 6    | 0                                   | 0.620000  | 2.420000  | -2.258000 |

|    |   |   |           |           |           |
|----|---|---|-----------|-----------|-----------|
| 11 | 6 | 0 | 2.015000  | 1.948000  | -1.834000 |
| 12 | 6 | 0 | 0.599000  | 2.736000  | -3.754000 |
| 13 | 8 | 0 | -0.235000 | -0.320000 | -3.568000 |
| 14 | 6 | 0 | -0.419000 | -2.628000 | 2.522000  |
| 15 | 6 | 0 | -0.724000 | -1.876000 | 3.591000  |
| 16 | 8 | 0 | -1.002000 | -0.526000 | 3.527000  |
| 17 | 6 | 0 | -0.550000 | 0.177000  | 2.358000  |
| 18 | 6 | 0 | -0.825000 | -2.444000 | 4.973000  |
| 19 | 8 | 0 | 0.379000  | 3.669000  | -1.579000 |
| 20 | 1 | 0 | -0.172000 | -2.827000 | -2.138000 |
| 21 | 1 | 0 | -0.208000 | -3.910000 | 0.112000  |
| 22 | 1 | 0 | -1.489000 | 1.828000  | -2.135000 |
| 23 | 1 | 0 | 2.073000  | 1.800000  | -0.750000 |
| 24 | 1 | 0 | 2.768000  | 2.707000  | -2.076000 |
| 25 | 1 | 0 | 2.299000  | 1.015000  | -2.329000 |
| 26 | 1 | 0 | -0.393000 | 3.082000  | -4.065000 |
| 27 | 1 | 0 | 0.874000  | 1.871000  | -4.365000 |
| 28 | 1 | 0 | 1.295000  | 3.550000  | -3.989000 |
| 29 | 1 | 0 | -0.221000 | -3.690000 | 2.616000  |
| 30 | 1 | 0 | -1.229000 | 1.027000  | 2.227000  |
| 31 | 1 | 0 | 0.449000  | 0.574000  | 2.573000  |
| 32 | 1 | 0 | -1.831000 | -2.287000 | 5.374000  |
| 33 | 1 | 0 | -0.618000 | -3.519000 | 4.994000  |
| 34 | 1 | 0 | -0.108000 | -1.950000 | 5.637000  |
| 35 | 1 | 0 | 0.277000  | 3.464000  | -0.631000 |

| Conformer <b>3c</b> |      | Standard Orientation<br>(Ångstroms) |           |           |           |
|---------------------|------|-------------------------------------|-----------|-----------|-----------|
| Center<br>Number    | Atom | Type                                | X         | Y         | Z         |
| 1                   | 6    | 0                                   | -0.313000 | -0.971000 | -1.313000 |
| 2                   | 6    | 0                                   | -0.196000 | -2.346000 | -1.262000 |
| 3                   | 6    | 0                                   | -0.177000 | -2.937000 | 0.003000  |
| 4                   | 6    | 0                                   | -0.285000 | -2.143000 | 1.163000  |
| 5                   | 6    | 0                                   | -0.413000 | -0.749000 | 1.072000  |
| 6                   | 6    | 0                                   | -0.414000 | -0.178000 | -0.189000 |
| 7                   | 8    | 0                                   | -0.503000 | 1.169000  | -0.430000 |
| 8                   | 6    | 0                                   | -0.450000 | 1.330000  | -1.886000 |
| 9                   | 6    | 0                                   | -0.360000 | -0.078000 | -2.439000 |
| 10                  | 6    | 0                                   | 0.739000  | 2.243000  | -2.251000 |
| 11                  | 6    | 0                                   | 0.928000  | 2.387000  | -3.762000 |
| 12                  | 6    | 0                                   | 0.544000  | 3.636000  | -1.633000 |
| 13                  | 8    | 0                                   | -0.372000 | -0.441000 | -3.601000 |

|    |   |   |           |           |           |
|----|---|---|-----------|-----------|-----------|
| 14 | 6 | 0 | -0.268000 | -2.737000 | 2.495000  |
| 15 | 6 | 0 | -0.568000 | -1.989000 | 3.570000  |
| 16 | 8 | 0 | -0.875000 | -0.646000 | 3.510000  |
| 17 | 6 | 0 | -0.461000 | 0.065000  | 2.331000  |
| 18 | 6 | 0 | -0.631000 | -2.558000 | 4.954000  |
| 19 | 8 | 0 | 1.960000  | 1.714000  | -1.710000 |
| 20 | 1 | 0 | -0.118000 | -2.936000 | -2.169000 |
| 21 | 1 | 0 | -0.083000 | -4.018000 | 0.083000  |
| 22 | 1 | 0 | -1.407000 | 1.764000  | -2.199000 |
| 23 | 1 | 0 | 1.250000  | 1.446000  | -4.219000 |
| 24 | 1 | 0 | 1.721000  | 3.110000  | -3.987000 |
| 25 | 1 | 0 | 0.009000  | 2.724000  | -4.252000 |
| 26 | 1 | 0 | 0.484000  | 3.584000  | -0.540000 |
| 27 | 1 | 0 | -0.366000 | 4.117000  | -2.008000 |
| 28 | 1 | 0 | 1.397000  | 4.286000  | -1.859000 |
| 29 | 1 | 0 | -0.047000 | -3.795000 | 2.586000  |
| 30 | 1 | 0 | -1.162000 | 0.898000  | 2.211000  |
| 31 | 1 | 0 | 0.532000  | 0.486000  | 2.527000  |
| 32 | 1 | 0 | -1.632000 | -2.422000 | 5.373000  |
| 33 | 1 | 0 | -0.401000 | -3.629000 | 4.971000  |
| 34 | 1 | 0 | 0.089000  | -2.050000 | 5.603000  |
| 35 | 1 | 0 | 1.852000  | 1.662000  | -0.742000 |

| Conformer <b>3d</b> |      | Standard Orientation<br>(Ångstroms) |           |           |           |
|---------------------|------|-------------------------------------|-----------|-----------|-----------|
| Center<br>Number    | Atom | Type                                | X         | Y         | Z         |
| 1                   | 6    | 0                                   | -0.197000 | -0.999000 | -1.334000 |
| 2                   | 6    | 0                                   | -0.036000 | -2.369000 | -1.260000 |
| 3                   | 6    | 0                                   | -0.118000 | -2.951000 | 0.007000  |
| 4                   | 6    | 0                                   | -0.352000 | -2.153000 | 1.145000  |
| 5                   | 6    | 0                                   | -0.508000 | -0.763000 | 1.031000  |
| 6                   | 6    | 0                                   | -0.433000 | -0.204000 | -0.233000 |
| 7                   | 8    | 0                                   | -0.587000 | 1.132000  | -0.500000 |
| 8                   | 6    | 0                                   | -0.397000 | 1.287000  | -1.944000 |
| 9                   | 6    | 0                                   | -0.191000 | -0.118000 | -2.471000 |
| 10                  | 6    | 0                                   | 0.782000  | 2.250000  | -2.201000 |
| 11                  | 6    | 0                                   | 1.105000  | 2.398000  | -3.689000 |
| 12                  | 6    | 0                                   | 0.471000  | 3.634000  | -1.612000 |
| 13                  | 8    | 0                                   | -0.089000 | -0.490000 | -3.626000 |
| 14                  | 6    | 0                                   | -0.442000 | -2.737000 | 2.479000  |
| 15                  | 6    | 0                                   | -0.465000 | -1.942000 | 3.562000  |

|    |   |   |           |           |           |
|----|---|---|-----------|-----------|-----------|
| 16 | 8 | 0 | -0.439000 | -0.564000 | 3.502000  |
| 17 | 6 | 0 | -0.829000 | 0.039000  | 2.256000  |
| 18 | 6 | 0 | -0.487000 | -2.483000 | 4.958000  |
| 19 | 8 | 0 | 1.968000  | 1.773000  | -1.546000 |
| 20 | 1 | 0 | 0.143000  | -2.962000 | -2.150000 |
| 21 | 1 | 0 | 0.004000  | -4.028000 | 0.105000  |
| 22 | 1 | 0 | -1.337000 | 1.677000  | -2.354000 |
| 23 | 1 | 0 | 1.504000  | 1.469000  | -4.108000 |
| 24 | 1 | 0 | 1.887000  | 3.150000  | -3.843000 |
| 25 | 1 | 0 | 0.223000  | 2.696000  | -4.264000 |
| 26 | 1 | 0 | 0.313000  | 3.583000  | -0.529000 |
| 27 | 1 | 0 | -0.419000 | 4.075000  | -2.073000 |
| 28 | 1 | 0 | 1.314000  | 4.319000  | -1.763000 |
| 29 | 1 | 0 | -0.447000 | -3.818000 | 2.570000  |
| 30 | 1 | 0 | -1.909000 | 0.222000  | 2.297000  |
| 31 | 1 | 0 | -0.324000 | 1.010000  | 2.212000  |
| 32 | 1 | 0 | -1.384000 | -2.137000 | 5.481000  |
| 33 | 1 | 0 | -0.488000 | -3.578000 | 4.976000  |
| 34 | 1 | 0 | 0.392000  | -2.138000 | 5.511000  |
| 35 | 1 | 0 | 1.775000  | 1.719000  | -0.591000 |

2.6 Cartesian coordinates for the low-energy optimized conformers of **7R-4** at B3LYP/6-31+G (d, p) level of theory in MeOH.

| Conformer <b>4a</b> |      | Standard Orientation<br>(Ångstroms) |           |           |           |
|---------------------|------|-------------------------------------|-----------|-----------|-----------|
| Center Number       | Atom | Type                                | X         | Y         | Z         |
| 1                   | 6    | 0                                   | 0.155000  | 2.123000  | 0.656000  |
| 2                   | 6    | 0                                   | 0.334000  | 2.094000  | 2.024000  |
| 3                   | 6    | 0                                   | 0.209000  | 0.855000  | 2.655000  |
| 4                   | 6    | 0                                   | -0.084000 | -0.313000 | 1.911000  |
| 5                   | 6    | 0                                   | -0.282000 | -0.251000 | 0.519000  |
| 6                   | 6    | 0                                   | -0.143000 | 0.986000  | -0.086000 |
| 7                   | 8    | 0                                   | -0.272000 | 1.242000  | -1.430000 |
| 8                   | 6    | 0                                   | -0.054000 | 2.615000  | -1.599000 |
| 9                   | 6    | 0                                   | 0.229000  | 3.244000  | -0.270000 |
| 10                  | 6    | 0                                   | -0.036000 | 3.204000  | -2.815000 |
| 11                  | 6    | 0                                   | -0.339000 | 2.425000  | -4.070000 |
| 12                  | 6    | 0                                   | 0.213000  | 4.667000  | -3.065000 |
| 13                  | 8    | 0                                   | 0.418000  | 4.400000  | 0.023000  |
| 14                  | 6    | 0                                   | -0.249000 | -1.639000 | 2.616000  |

|    |   |   |           |           |           |
|----|---|---|-----------|-----------|-----------|
| 15 | 6 | 0 | -0.186000 | -2.846000 | 1.647000  |
| 16 | 8 | 0 | -1.018000 | -2.592000 | 0.510000  |
| 17 | 6 | 0 | -0.565000 | -1.488000 | -0.280000 |
| 18 | 6 | 0 | -0.771000 | -4.066000 | 2.375000  |
| 19 | 8 | 0 | 1.187000  | -3.070000 | 1.296000  |
| 20 | 6 | 0 | 1.427000  | -4.212000 | 0.486000  |
| 21 | 1 | 0 | 0.564000  | 2.997000  | 2.579000  |
| 22 | 1 | 0 | 0.342000  | 0.792000  | 3.734000  |
| 23 | 1 | 0 | -0.520000 | 1.362000  | -3.883000 |
| 24 | 1 | 0 | -1.233000 | 2.829000  | -4.558000 |
| 25 | 1 | 0 | 0.500000  | 2.497000  | -4.770000 |
| 26 | 1 | 0 | 0.435000  | 5.243000  | -2.167000 |
| 27 | 1 | 0 | 1.062000  | 4.791000  | -3.746000 |
| 28 | 1 | 0 | -0.668000 | 5.122000  | -3.531000 |
| 29 | 1 | 0 | 0.527000  | -1.741000 | 3.385000  |
| 30 | 1 | 0 | -1.229000 | -1.604000 | 3.109000  |
| 31 | 1 | 0 | 0.331000  | -1.786000 | -0.836000 |
| 32 | 1 | 0 | -1.357000 | -1.285000 | -1.008000 |
| 33 | 1 | 0 | -0.137000 | -4.371000 | 3.214000  |
| 34 | 1 | 0 | -1.782000 | -3.861000 | 2.744000  |
| 35 | 1 | 0 | -0.867000 | -4.924000 | 1.699000  |
| 36 | 1 | 0 | 2.452000  | -4.149000 | 0.111000  |
| 37 | 1 | 0 | 0.749000  | -4.251000 | -0.372000 |
| 38 | 1 | 0 | 1.344000  | -5.127000 | 1.078000  |

| Conformer <b>4b</b> |      | Standard Orientation<br>(Ångstroms) |           |           |           |
|---------------------|------|-------------------------------------|-----------|-----------|-----------|
| Center<br>Number    | Atom | Type                                | X         | Y         | Z         |
| 1                   | 6    | 0                                   | 0.057000  | 1.994000  | 0.455000  |
| 2                   | 6    | 0                                   | 0.237000  | 1.971000  | 1.823000  |
| 3                   | 6    | 0                                   | 0.097000  | 0.738000  | 2.464000  |
| 4                   | 6    | 0                                   | -0.209000 | -0.430000 | 1.726000  |
| 5                   | 6    | 0                                   | -0.409000 | -0.374000 | 0.332000  |
| 6                   | 6    | 0                                   | -0.256000 | 0.857000  | -0.280000 |
| 7                   | 8    | 0                                   | -0.386000 | 1.108000  | -1.626000 |
| 8                   | 6    | 0                                   | -0.152000 | 2.477000  | -1.802000 |
| 9                   | 6    | 0                                   | 0.143000  | 3.109000  | -0.478000 |
| 10                  | 6    | 0                                   | -0.131000 | 3.061000  | -3.022000 |
| 11                  | 6    | 0                                   | -0.446000 | 2.280000  | -4.272000 |
| 12                  | 6    | 0                                   | 0.135000  | 4.520000  | -3.280000 |
| 13                  | 8    | 0                                   | 0.352000  | 4.262000  | -0.191000 |
| 14                  | 6    | 0                                   | -0.390000 | -1.754000 | 2.434000  |

|    |   |   |           |           |           |
|----|---|---|-----------|-----------|-----------|
| 15 | 6 | 0 | -0.254000 | -2.949000 | 1.460000  |
| 16 | 8 | 0 | -1.140000 | -2.714000 | 0.350000  |
| 17 | 6 | 0 | -0.717000 | -1.613000 | -0.460000 |
| 18 | 6 | 0 | -0.777000 | -4.226000 | 2.128000  |
| 19 | 8 | 0 | 1.068000  | -3.183000 | 0.960000  |
| 20 | 6 | 0 | 2.111000  | -3.270000 | 1.916000  |
| 21 | 1 | 0 | 0.475000  | 2.876000  | 2.372000  |
| 22 | 1 | 0 | 0.226000  | 0.683000  | 3.543000  |
| 23 | 1 | 0 | -0.639000 | 1.220000  | -4.079000 |
| 24 | 1 | 0 | -1.336000 | 2.691000  | -4.759000 |
| 25 | 1 | 0 | 0.392000  | 2.338000  | -4.974000 |
| 26 | 1 | 0 | 0.364000  | 5.098000  | -2.384000 |
| 27 | 1 | 0 | 0.986000  | 4.630000  | -3.961000 |
| 28 | 1 | 0 | -0.741000 | 4.982000  | -3.748000 |
| 29 | 1 | 0 | 0.321000  | -1.834000 | 3.263000  |
| 30 | 1 | 0 | -1.402000 | -1.740000 | 2.859000  |
| 31 | 1 | 0 | 0.158000  | -1.913000 | -1.048000 |
| 32 | 1 | 0 | -1.535000 | -1.410000 | -1.160000 |
| 33 | 1 | 0 | -0.248000 | -4.450000 | 3.060000  |
| 34 | 1 | 0 | -1.847000 | -4.149000 | 2.349000  |
| 35 | 1 | 0 | -0.645000 | -5.086000 | 1.462000  |
| 36 | 1 | 0 | 3.017000  | -3.594000 | 1.396000  |
| 37 | 1 | 0 | 1.891000  | -4.003000 | 2.696000  |
| 38 | 1 | 0 | 2.316000  | -2.291000 | 2.357000  |

| Conformer <b>4c</b> |      | Standard Orientation<br>(Ångstroms) |           |           |           |
|---------------------|------|-------------------------------------|-----------|-----------|-----------|
| Center<br>Number    | Atom | Type                                | X         | Y         | Z         |
| 1                   | 6    | 0                                   | 0.114000  | 2.127000  | 0.669000  |
| 2                   | 6    | 0                                   | 0.322000  | 2.084000  | 2.033000  |
| 3                   | 6    | 0                                   | 0.545000  | 0.830000  | 2.604000  |
| 4                   | 6    | 0                                   | 0.549000  | -0.339000 | 1.806000  |
| 5                   | 6    | 0                                   | 0.355000  | -0.264000 | 0.414000  |
| 6                   | 6    | 0                                   | 0.127000  | 0.989000  | -0.127000 |
| 7                   | 8    | 0                                   | -0.109000 | 1.260000  | -1.454000 |
| 8                   | 6    | 0                                   | -0.282000 | 2.646000  | -1.554000 |
| 9                   | 6    | 0                                   | -0.149000 | 3.267000  | -0.198000 |
| 10                  | 6    | 0                                   | -0.458000 | 3.265000  | -2.734000 |
| 11                  | 6    | 0                                   | -0.566000 | 2.492000  | -4.024000 |
| 12                  | 6    | 0                                   | -0.627000 | 4.750000  | -2.911000 |
| 13                  | 8    | 0                                   | -0.283000 | 4.421000  | 0.161000  |
| 14                  | 6    | 0                                   | 0.825000  | -1.683000 | 2.433000  |

|    |   |   |           |           |           |
|----|---|---|-----------|-----------|-----------|
| 15 | 6 | 0 | 0.386000  | -2.869000 | 1.542000  |
| 16 | 8 | 0 | 0.871000  | -2.655000 | 0.213000  |
| 17 | 6 | 0 | 0.338000  | -1.500000 | -0.438000 |
| 18 | 6 | 0 | -1.138000 | -3.069000 | 1.588000  |
| 19 | 8 | 0 | 1.031000  | -4.022000 | 2.117000  |
| 20 | 6 | 0 | 0.936000  | -5.207000 | 1.340000  |
| 21 | 1 | 0 | 0.312000  | 2.990000  | 2.631000  |
| 22 | 1 | 0 | 0.721000  | 0.757000  | 3.676000  |
| 23 | 1 | 0 | -0.442000 | 1.413000  | -3.891000 |
| 24 | 1 | 0 | -1.549000 | 2.656000  | -4.480000 |
| 25 | 1 | 0 | 0.202000  | 2.826000  | -4.729000 |
| 26 | 1 | 0 | -0.546000 | 5.322000  | -1.987000 |
| 27 | 1 | 0 | 0.135000  | 5.134000  | -3.597000 |
| 28 | 1 | 0 | -1.612000 | 4.965000  | -3.339000 |
| 29 | 1 | 0 | 1.909000  | -1.743000 | 2.604000  |
| 30 | 1 | 0 | 0.346000  | -1.759000 | 3.417000  |
| 31 | 1 | 0 | 0.949000  | -1.339000 | -1.333000 |
| 32 | 1 | 0 | -0.684000 | -1.717000 | -0.769000 |
| 33 | 1 | 0 | -1.455000 | -3.448000 | 2.565000  |
| 34 | 1 | 0 | -1.688000 | -2.145000 | 1.385000  |
| 35 | 1 | 0 | -1.460000 | -3.791000 | 0.830000  |
| 36 | 1 | 0 | 1.500000  | -5.991000 | 1.853000  |
| 37 | 1 | 0 | 1.376000  | -5.069000 | 0.348000  |
| 38 | 1 | 0 | -0.101000 | -5.543000 | 1.254000  |
